# Supplementary material for: The olfactory receptor SNIF-1 mediates foraging for leucine-enriched diets in C. elegans
Source: eLife. 2026 Apr 24;13:RP101936. doi: 10.7554/eLife.101936 (PMC13108967; doi:10.7554/eLife.101936)
Supplement: Source data 1. [file elife-101936-data1.xlsx]

## Sheet: Figure 1
Figure 1B														Figure 1C														Figure 1D														Figure 1F
CEent1	JUb66	BIGb0170	JUb0393	MSPm1	JUb134	JUb44	MYb10	MYb71	JUb19	BIGb0172	MYb11	OP50		CEent1	JUb66	BIGb0170	JUb0393	MSPm1	JUb134	JUb44	MYb10	MYb71	JUb19	BIGb0172	MYb11	OP50		CEent1	JUb66	BIGb0170	JUb0393	MSPm1	JUb134	JUb44	MYb10	MYb71	JUb19	BIGb0172	MYb11	OP50		CEent1	JUb66	BIGb0170	BIGb0393	MSPm1	JUb19	JUb134	BIGb0172
0.969697	0.517241	0.380952	0.145833	-0.45161	-0.10811	0.103448	0	0.044444	0.095238	-0.12195	0.054054	0.1125		-0.26316	-0.57143	-0.21277	-0.90698	0.166667	-0.16418	-0.07692	-0.13043	0.105263	0.142857	0.217391	0.30303	-0.31429		0.25641	-0.58824	-0.19565	0.375	-0.04918	-0.1	0.636364	0.084746	0.358974	-0.04918	0.515789	0.222222	-0.12676		0.166667	0.352941	0.272727	-0.04255	-0.15385	-0.24528	-0.425	-0.19444
0.758065	0.794118	0.684211	0.675676	0.020408	0.290323	0.297297	0.076923	0.372549	0.411765	-0.05263	0.047619	0.032258		-0.27273	-0.52778	-0.25	-0.80645	0.151515	0.142857	0.354839	-0.15	0.783784	-0.24444	-0.09091	-0.01887	0.020833		0.372549	-0.07042	-0.22667	0.090909	-0.34091	0.476923	-0.11111	-0.04615	0.333333	-0.26316	0.175	0.253731	0.220339		0.454545	0.438356	0.4375	-0.07273	0.066667	-0.37255	-0.19355	-0.27273
0.80303	0.647059	0.619048	0.823529	-0.08	-0.03125	0.319149	0.058824	-0.33333	0.116279	-0.22581	0.382353	0.315789		-0.4	-0.51111	-0.44444	-0.36	0.28	-0.26154	0.285714	-0.20588	0.6	-0.64912	0.407407	-0.16667	0.212121		0.5	-0.13846	-0.71429	0.389831	0.069767	-0.03125	-0.09804	0.125	0.486486	-0.05263	0.087719	-0.13636	0.101449		0.352941	0.5	0.388889	-0.22857	0.205882	-0.375	-0.17391	-0.125
0.972222	0.728395	0.773585	0.384615	-0.08571	0.384615	0.391304	-0.17241	0.294118	-0.13514	0.1875	0.225806	-0.04348		-0.45	-0.03448	-0.81395	-1	0.15	-0.04	0.027027	-0.2	0.75	-0.52632	-0.07692	0.061224	0.181818		0.472222	-0.58333	-0.15625	0.652174	-0.27536	0.114754	0.1875	0.457627	0.791667	0.025641	-0.02778	0.26087	0.295775		0.264706	0.32	0.3	-0.09804	0.119048	-0.41304	-0.19512	-0.20513
0.816667	0.596154	0.709091	0.666667	0.159091	0.235294	0.473684	0.071429	0	0.538462	0.404255	0.3125	-0.10526		0	-0.5814	-0.31429	-0.93939	-0.31818	-0.09091	-0.59091	-0.03226	0.666667	-0.5625	-0.04762	0.319149	-0.35897		0.607143	-0.14286	-0.25424	0.353846	0.283019	-0.07317	-0.10769	-0.03846	0.2	-0.05556	-0.1746	-0.2	0.012821		0.228571	0.34375	0.480769	-0.08333	-0.02273	-0.24242	-0.30303	-0.17073
0.777778	0.927273	0.842105	0.42029	0.769231	0.43662	0.038462	0.22807	0.525424	-0.08197	0.233333	0.361111	0.166667		0.116279	-0.21667	0.021277	0.333333	0.076923	-0.4375	-0.53846	0.170213	-0.2	0	-0.05	0.30303	0.45098		0.122807	0.066667	0.3125	-0.09091	-0.75701	-0.21951	0.090909	-0.20896	-0.3913	-0.37037	-0.03704	-0.10811	-0.03846		0.566667	0.34375	0.384615	-0.18519	0.018182	-0.2	-0.24561	-0.32653
0.235294	0.8	0.666667	0.116667	0.361111	0.278689	0.444444	0.238095	0.044776	-0.2	0.070423	0.06383	0.060976		-0.18182	0.078431	-0.29787	-0.12766	0.22807	0.068966	0.37931	0.072727	-0.17143	0.045455	-0.18919	-0.01887	-0.04167		-0.20588	0.180328	0.346939	-0.33333	-0.33333	-0.30769	0.207547	0.015873	-0.08571	-0.41791	-0.44828	-0.33333	0.107143		0.325	0.350877	0.415094	-0.10526	-0.02564	-0.30645	-0.27143	-0.27119
0.901639	0.546667	0.52	0.508197	0.215686	0.352941	0.490196	0.255814	-0.13433	0.172414	0.538462	-0.12903	0.046512		-0.21277	0.12	0.09434	0.022222	-0.09091	-0.38889	-0.04255	-0.04545	0.166667	0.051282	0	-0.16667	0.017544		0.108696	-0.28571	-0.21311	-0.24324	-0.25301	0.170213	-0.01695	-0.44681	0.130435	-0.17647	-0.16	-0.06897	-0.09615		0.470588	0.421875	0.375	-0.25714	0.152542	-0.25	-0.37097	-0.24
0.791667	0.12963	0.684211	0.344828	-0.14754	0.4375	0.439024	0.288462	0.261905	-0.30909	0.454545	0.153846	-0.02381		-0.22727	0.113636	0.377358	0.027027	0.210526	0.259259	0.127273	0.212121	0.345455	-0.22222	0.5	0.061224	-0.15625		0.137255	-0.10145	0.238095	-0.12281	-0.36585	-0.10204	-0.13208	-0.25	-0.31429	-0.50943	0.25	-0.17647	-0.06122		0.488095	0.372093	0.191489	-0.03333	0.078431	-0.10345	-0.37879	-0.11667
0.925926	0.271186	0.387097	0.64557	-0.42308	0.4	-0.05128	0.333333	0.194444	0.358491	0.233333	0.235294	0.017544		0.105263	0.644444	0.818182	0.277778	0.061728	-0.28205	-0.04762	0.727273	0.6	-0.01639	0.102041	0.319149	0.255814		-0.04348	-0.61765	-0.06061	-0.31148	-0.44681	-0.45455	-0.17241	-0.42857	0.047619	-0.38667	0.128205	0.26087	-0.8		0.568966	0.339286	0.729167	0.097561	0.309091	-0.11628	-0.38462	-0.1875
0.958333	0.5	0.068966	-0.04878	0.59375	0.290323	-0.3913	-0.12	0	0.21875	0.019608	-0.18919	-0.28846		0	0.2	0.482759	0.333333	0.470588	0.25	-0.34211	0.232877	-0.06383	0.081081	-0.42857	0.16129	0		-0.20635	0.169231		-0.47059	-0.15068		-0.06122	0.311475	0.333333	0.391304			0.012987		0.488372	0.478873	0.316667	-0.10909	-0.14286	-0.42857	-0.28261	-0.14035
0.892857	0.535714	0.269231	0.375	0.647059	-0.02632	0.093333	0.150685	0.117647	0.033333	0.0625	0.1875	-0.15		0.05	0.185185	-0.26667	-0.04	0.288889	-0.42105	-0.02381	-0.06667	-0.19444	0.093023	-0.16667	-0.02381	0.263158		-0.23529	-0.35065		-0.5	-0.11111		-0.18367	0.155556	0.057143	0.5			0.043478		0.5	0.393939	0.203704	-0.08333	-0.02381	-0.31111	-0.4	-0.19118
1	0.603175	0.731343	0.107692	0.428571	0.347826	0.066667	0.285714	0	0.25	0.176471	-0.1	-0.25926		-0.49398	0.407407	-0.25714	-0.15254	0.358491	-0.10526	0.174603	0.054054	-0.02041	0.035714	0.045455	0.12	0.210526		-0.42857	-0.53571		-0.31034	0.071429		-0.05714	-0.04167	-0.06667	0.278689			0.192982		0.370968	0.311475	0.428571	-0.26531	-0.04839	-0.18841	-0.19565	-0.17333
0.854545	0.451613	0.215385	0.39726	0.692308	-0.15663	0.127273	0.392405	-0.12329	0.684211	0.169231	0.055556	0.117647		0.044776	0.196429	-0.26667	0.333333	0.079365	-0.07692	-0.13846	0.428571	-0.09804	-0.1746	0.344828	0.304348	0.277778		0.080645	-0.14894		-0.4	-0.16364		-0.39706	0.19403	-0.41463	0.464286			-0.10204		0.388889	0.4	0.353846	-0.07843	0.064516	-0.34043	-0.44776	-0.27083
0.631579	0.962963	0.4	-0.05714	0.214286	-0.02326	-0.51724	0.134328	0.287671	0.226667	-0.16667	-0.18182	-0.29412		-0.42857	0.216216	0.076923	-0.38636	0.074627	-0.33333	-0.28302	0.219512	-0.22449	-0.07143	-0.31507	-0.09434	-0.125		0.195122	-0.20833		-0.26531	0.301587		-0.13793	0.341463	0.020408	0.222222			-0.23256
0.888889	0.787879	0.672414	-0.1	0.647059			0.309524	0.074627	0.066667		0.081967	0.022727		0		-0.06667				0.1875				-0.25581
0.944444	0.865169	0.591837	0.294118	0.186441			0.37037	0.461538	0.138462		0.079545	-0.36667		-0.16667		-0.63636				-0.25				0.1
0.802817	0.786885	0.611111	0.6	0.236842			0.292308	-0.01493	0.018868		-0.06122	0.0625		0.086957		-0.65714				0.103448				-0.05556
0.131579	0.803922	0.685714	0.375	0.534884			-0.28205	0.650794	0.233333		-0.07018	-0.46296		-0.22449		-0.33333				-0.20833				0.219512
0.676471	0.942857	0.365591	-0.03226	0.226667			0.106383	0.25	0.073171		-0.25	0.121951		-0.02128		0.058824				-0.16667				0
0.755102	0.977011	0.692308									-0.01923	-0.26761
0.647059	-0.075	0.698113									-0.33333	0.028571
0.132075	-0.01163	-0.2449									-0.13846	0.09589
0.173913	0.391304	0.019608									0.015152	-0.03333
0.207547	-0.10714	0									0.06383	-0.05882
0.333333	0.37037	0.2									0.307692	0.150685
0.041667	0.285714	0.2									0.142857	-0.1
0.13253	0.767442	0.06383									0.15625	0.295238
0.258065	0.846154	0.142857									-0.01695	0.168831
0.322581	0.448276	-0.05882									0.164179	0.103448
-0.06897	0.707317	0.169811									0.12	-0.13793
0.037037	-0.13158	0.019608									0.463415	-0.10811
0.181818	-0.03333	-0.39286									0.076923
-0.01667	-0.30769	0.213115									-0.02439
-0.10526	0.258065	0.272727									0.3
0.181818	-0.23636	0.409091									0.111111
		-0.44
[truncated: 4 more columns]

## Sheet: Figure 1 figure supplements
Figure 1-figure supplement 1A														Figure 1-figure supplement 1B														Figure 1-figure supplement 1C														Figure 1-figure supplement 1D
CEent1	JUb66	BIGb0170	JUb0393	MSPm1	JUb134	JUb44	MYb10	MYb71	JUb19	BIGb0172	MYb11	OP50		CEent1	JUb66	BIGb0170	JUb0393	MSPm1	JUb134	JUb44	MYb10	MYb71	JUb19	BIGb0172	MYb11	OP50		CEent1	JUb66	BIGb0170	BIGb0393	MSPm1	JUb134	JUb44	MYb10	MYb71	JUb19	BIGb0172	MYb11	OP50		CEent1	JUb66	BIGb0170	BIGb0393	MSPm1	JUb134	JUb44	MYb10
-0.1	0.090909	0.113924	-0.0483871	-0.58333	0.351351	-0.24528	-0.29231	0.4	0.2	0	0.354839	0.32		-0.2037	0.245902	-0.26667	-0.47826	-0.17308	0.169811	-0.11475	-0.37778	-0.33333	-0.2381	0.145833	-0.29412	-0.18519		-0.52	-0.2963	-0.65217	-0.72222	0.828571	0.084746	0.093023	-0.03226	-0.42857	0.064516	-0.33333	-0.2459	0.16129		0.125	-0.4186	0.153846	-0.41176	-0.14286	-0.48387	0.418605	-0.22222
0.122807	-0.28571	0.023256	-0.192308	-0.27632	-0.15254	-0.09091	-0.14286	0.111111	0.073171	-0.08696	0.322581	0.090909		-0.15625	0	-0.19444	-0.21053	0.034483	0.035714	-0.29268	-0.15942	0	-0.36986	-0.2	0.241379	-0.08621		-0.17073	0.115385	-0.40541	-0.58065	0.102041	0.384615	0.028571	-0.24074	-0.34694	-0.23684	-0.25	-0.02703	0.117647		0.147059	0.033333	-0.21053	-0.69231	0.304348	-0.35294	0.5	-0.42857
0.016393	-0.38028	0.025	-0.661538	-0.09412	0.365854	-0.28358	0		0.297297	0.028986	0.181818	-0.4375		-0.47692	0.238095	-0.16438	-0.41026	-0.12121	0.16	-0.55	-0.2619	-0.16667	-0.52381	0.101449	0.178571	0.034483		-0.4375	0.055556	0.176471	-0.17949	-0.27027	0.580645	-0.15556	0.052632	-0.33333	-0.23636	-0.2549	0.533333	0.263158		-0.10638	0.046512	-0.32653	-0.34375	0.375	-0.54717	0.181818	-0.14706
0.098901	-0.15556	0.152542	-0.234375	0.086207	0.085714	-0.01754	-0.3			0	-0.01786	0.333333		-0.37931	-0.01493	-0.06897	-0.27632	-0.12245	-0.37143	0.145833	0.319149	-0.49367	-0.38028	-0.30435	-0.24658	-0.08571		0.014925	0.069767	0.567568	-0.4359	-0.45946	0.302326	-0.41935	0.32	0.265306	-0.25253	0.032258	0.125	0.047619		-0.20755	-0.0625	-0.5	-0.27273	-0.17949	-0.43396	-0.45455	-0.53704
			-0.361702		0.047619	-0.19231	-0.22807			0	-0.04348	0.241379		-0.18519	-0.02941	0.494253	-0.6129	-0.61905	-0.40909	-0.36508	-0.71429	-0.39683	-0.48193	0.296296	-0.15942	0.078431		-0.18182	0.086957	0.5625	-0.23404	-0.10526	-0.22222	0.317073	0.266667	0.225806	-0.2459	-0.29032	0.28125	0.030303		0.242424	-0.30435	-0.22222	-0.48148	-0.03922	-0.0303	-0.58333	-0.29032
-0.54386	0.058824		0.287671	-0.34375	-0.075		-0.36842	-0.16129	-0.17143	0.058824	-0.52239	0.392857		-0.35385	-0.15942	0.084746	0.020408	-0.10345	-0.31818	0.1	0	-0.40741	-0.36232	-0.07463	-0.30645	-0.21739		-0.47059	0.25	0.058824	-0.60784	-0.15385	0.583333	0.188406	-0.5	-0.17073	-0.36364	-0.52632	0.157895	0.171429		0.083333	0.055556	-0.14286	0.272727	0.235294	-0.42857	-0.39474	0.222222
0.405405	-0.13725		0.103448	-0.18841	-0.62162		0.12	0.5	0.205882	0.183673	0.16	0.153846		-0.4375	-0.06897	0.111111	-0.26829	-0.2	-0.28571	-0.07246	0.215686	-0.58442	-0.17857	-0.28395	-0.27536	-0.21277		-0.67568	-0.10811	0.35	0.023256	-0.36842	0.745455	0.275862	0.574074	-0.36364	-0.40909	-0.35714	-0.27273	-0.35294		0.264706	0.651163	0.481481	-0.40541	0.263158	-0.5	0.03125	-0.2623
0.138462	-0.14545		-0.47541	0.21875	-0.25		0.066667	-0.17857	-0.30435	0.333333	-0.02041	0.190476		-0.06452	-0.44118	0.074074	-0.22581	-0.40845	-0.07042	-0.84375	-0.39535	-0.17241	-0.05263	0.054545	0.44186	-0.30233		-0.41935	-0.21622	0.176471	-0.07143	-0.41935	0.333333	0.208333	-0.42105	-0.15789	-0.23404	-0.05	-0.34783	-0.3125		-0.42029	-0.03846	-0.32203	0.191176	-0.52941	0.225806	-0.2093	0.125
0.363636	-0.09804		0.492958	-0.09091			0.066667	0	0.037975	0.012987	-0.10204	-0.07895		-0.46667	0.208333		0.122807	-0.06452	-0.16923	-0.48649	-0.14286	0.121212	-0.04	-0.63934	-0.04688	-0.16667		-0.39216	-0.33333	0.580645	0.043478	-0.03226	-0.02326	-0.05618	0.070423	-0.19149	-0.35484	0.428571	-0.66667	0.173913		-0.44444	0.658537	0.511111	-0.28571	-0.07317	-0.27027	-0.07895	0.428571
0.038462	-0.65		0.276596	-0.01449			0.0625	0.575758	-0.30612	-0.51163	-0.21311	-0.17333		-0.42105	-0.26027		-0.4433	0	-0.15152		0.653846	-0.46939	-0.25424	-0.46939	0.153846	0.31746		-0.2	-0.33333	0.166667	-0.25373	-0.34043	0.316456	-0.77049	-0.05882	-0.22222	-0.08108	-0.5	-0.29167	-0.35		-0.2766	-0.3125	0.595238	-0.02941	0.65625	-0.36508	-0.67568	-0.02941
0.123288	0.042254	-0.14458	-0.0609756	-0.14851		0.085714		0.338028	-0.05405	0.195122	-0.02778	-0.41096		-0.10769	0.22807		0.081081	-0.33962			-0.27586	0.513514	0.045455	-0.53191	-0.06667	0.107692
0.116883	-0.50617	-0.23913	0	-0.25333		-0.01493		0.323944	-0.40625	-0.175	-0.05882	-0.32432		-0.02222	-0.54054		0.142857	-0.2			-0.2043	0.355932	-0.11864	-0.06452	-0.03704	-0.15789
0.541667	-0.10843	-0.07843	-0.3	0.041667		-0.32		0.452055	-0.10714	-0.2459	-0.35897	-0.31765		-0.47368	0.171429		0.103448				-0.13725	-0.19048	0.306122	-0.25581	0.133333	-0.125
-0.50538	0	0.416667	-0.0322581	-0.26027		0.119403		0.246753	-0.18421	-0.32075	0.119048	0.134328		-0.67742	-0.34921		-0.2				-0.28302		-0.21875	-0.22727	-0.16364	-0.31429
0.176471	-0.08889	-0.08772	-0.134615	0.25		-0.30303		0.352113	-0.36508	-0.18421	-0.10588	-0.33333		-0.5									-0.47368	-0.05085		0.384615
[truncated: 48 more columns]

## Sheet: Figure 2
Figure 2A			Figure 2B			Figure 2C								Figure 2D			Figure 2F
X	Y		X	Y			LEU +			LEU -				+ LEU	- LEU		CEent1
0.20153	82093.2		0.20153	82540.3			CEent1	JUb66	BIGb0170	CEent1	JUb66	BIGb0170		8e-06	1.32e-06		1.70841
0.20445	47232.2		0.20445	67879.3		Isoamyl alcohol	89.3709	90.7132	81.7298	57.9333	42.6967	66.8667		4.96e-06	1.2e-06		1.39317
0.20737	0		0.20737	0		Acetoin	1.24722	6.41126	2.50846	29.9592	36.63	0		1.03e-05	1.28e-06		2.3555
0.21027	0		0.21027	0		Isovalerate	0	0	0	0	0	19.5533					1.62171
0.21318	0		0.21318	0		Butyl acetate	0	0	0	0	0	8.15
0.2161	0		0.2161	0		Isobutanol	0	0	0	6.10571	6.64333	0
0.219	0		0.219	0		Phenylethyl alcohol	0	0	0	0.704685	7.53333	0
0.22192	0		0.22192	0		Methyl isovalerate	0	0	0	0	0	5.42667
0.22483	0		0.22483	0		Carbonic acid, methyl pentyl ester	0	0	0	0	4.46	0
0.22773	0		0.22773	0		2,3-Butanediol	0	0	0	1.9632	1.30667	0
0.23065	0		0.23065	0		Isoamyl acetate	6.82883	1.73366	3.83754	0.818212	0.463333	0
0.23357	0		0.23357	0		10,13-Octadecadiynoic acid, methyl ester	0	0	0	0	0.136667	0
0.23647	0		0.23647	0		Isoamyl propionate	0	0	0	0	0.126667	0
0.23938	0		0.23938	0		Isovaleradehyde	1.67094	0.228008	0.00745	0	0	0
0.2423	0		0.2423	0		2-Nonanone	0.882162	0.913898	11.9167	0	0	0
0.2452	163.351		0.2452	0
0.24812	187.117		0.24812	0
0.25103	161.565		0.25103	182.781
0.25393	313.319		0.25393	1379.78
0.25685	2120.59		0.25685	3954.71
0.25977	6006.62		0.25977	10151.5
0.26267	14356.9		0.26267	18675
0.26558	23006.8		0.26558	33740.2
0.2685	31448.4		0.2685	49667.8
0.2714	41244.9		0.2714	59869.7
0.27432	51575.9		0.27432	68221.8
0.27723	58584.4		0.27723	76700.1
0.28013	64531.2		0.28013	84315.5
0.28305	74027		0.28305	93859.8
0.28597	77922		0.28597	96757.8
0.28888	80836.8		0.28888	100609
0.29178	84536.6		0.29178	107357
0.2947	88806.2		0.2947	108105
0.29762	92803.6		0.29762	108576
0.30053	95569.7		0.30053	101040
0.30343	100239		0.30343	102615
0.30635	102685		0.30635	109242
0.30927	101115		0.30927	110712
0.31218	100381		0.31218	116253
0.31508	100988		0.31508	114331
0.318	100461		0.318	122650
0.32092	103939		0.32092	122186
0.32383	107645		0.32383	118570
0.32673	108865		0.32675	116336
0.32965	113277		0.32965	118567
0.33257	121672		0.33257	124100
0.33548	119662		0.33548	125109
0.33838	118359		0.3384	121234
0.3413	118665		0.3413	122386
0.34422	125254		0.34422	128163
0.34713	124845		0.34713	124239
0.35003	128654		0.35005	125597
0.35295	121827		0.35295	132120
0.35587	123922		0.35587	131310
0.35878	129811		0.35878	131596
0.36168	136726		0.3617	130142
0.3646	135050		0.3646	133636
0.36752	136892		0.36752	136073
0.37043	136718		0.37043	137890
0.37335	132822		0.37335	141080
0.37625	132863		0.37625	141000
0.37917	131564		0.37917	142782
0.38208	138461		0.38208	144515
0.385	144570		0.385	140080
0.3879	132175		0.38792	130153
0.39082	128009		0.39082	133784
0.39373	130802		0.39373	135125
0.39665	138393		0.39665	135584
0.39955	138217		0.39957	132066
0.40247	132643		0.40247	131307
0.40538	126207		0.40538	134555
0.4083	131543		0.4083	133686
0.4112	122195		0.41122	125427
0.41412	127496		0.41412	130224
0.41703	127651		0.41703	128484
0.41995	121553		0.41995	128245
0.42285	119746		0.42287	131884
0.42577	123296		0.42578	127754
0.42868	126510		0.42868	127052
0.4316	126484		0.4316	125943
0.43452	125763		0.43452	129152
0.43742	118285		0.43743	125198
0.44033	120240		0.44033	127943
0.44325	117931		0.44325	118098
0.44617	120243		0.44617	117812
0.44907	120013		0.44908	114987
0.45198	119732		0.45198	113959
0.4549	109350		0.4549	117915
0.45782	113661		0.45782	113742
0.46072	113987		0.46073	109612
0.46363	112473		0.46363	109851
0.46655	110973		0.46655	116566
0.46947	106144		0.46947	116782
0.47237	101431		0.47238	115757
0.47528	104395		0.4753	108056
0.4782	105942		0.4782	118433
0.48112	105383		0.48112	116681
0.48402	104155		0.48403	120054
0.48693	104480		0.48695	112057
0.48985	103509		0.48985	103416
0.49277	99887.5		0.49277	99931.8
0.49567	101337		0.49568	97039.7
0.49858	103550		0.4986	106618
0.5015	96343		0.5015	105419
0.50442	96167.6		0.50442	103544
0.50733	94285.5		0.50733	103834
0.51023	99641.9		0.51025	107044
0.51315	100176		0.51315	105129
0.51607	100623		0.51607	105733
0.51898	96704.2		0.51898	95718.7
0.52188	96083.9		0.5219	95798.4
0.5248	95614.2		0.5248	95421.9
0.52772	94970.1		0.52772	93580.6
0.53063	92033.2		0.53063	94496.6
0.53353	94052.2		0.53355	101828
0.53645	94976		0.53645	104956
0.53937	94276.1		0.53937	102020
0.54228	99399.9		0.54228	102908
0.54518	96280.7		0.5452	102073
0.5481	91237.5		0.54812	97808.4
0.55102	91389.1		0.55102	93373.1
0.55393	92374.1		0.55393	100346
0.55683	91816.7		0.55685	99871.4
0.55975	91703.1		0.55977	100662
0.56267	94569.5		0.56267	100196
0.56558	91211.8		0.56558	106486
0.56848	92641.9		0.5685	101364
0.5714	98011.5		0.57142	97826.5
0.57432	100497		0.57432	97564.4
0.57723	96281.6		0.57723	95797.8
0.58013	90096.6		0.58015	95944.9
0.58305	104028		0.58307	92281
0.58597	92679.1		0.58597	94482
0.58888	90088.8		0.58888	97894.3
0.59178	94484.9		0.5918	94784.4
0.5947	94554.7		0.59472	91009.5
0.59762	91129.1		0.59762	92237.3
0.60053	89717.4		0.60053	93467.6
0.60345	91662.9		0.60345	108170
0.60635	101962		0.60637	94933.4
0.60927	102176		0.60927	92898.1
0.61218	87331.4		0.61218	92858.1
0.6151	89053.3		0.6151	93630.6
0.618	90425.8		0.61802	95961
0.62092	87974.1		0.62092	98061.1
0.62383	92780.7		0.62383	96352.7
0.62675	91606.1		0.62675	90413.9
0.62965	94479.1		0.62967	89610.5
0.63257	99769.8		0.63258	85056.9
0.63548	96550.9		0.63548	87643.5
0.6384	94736.2		0.6384	82308.1
0.6413	87135.6		0.64132	82393.7
0.64422	86870.8		0.64423	91329.8
0.64713	88793.2		0.64713	95404.8
0.65005	92846.8		0.65005	94309.4
0.65295	91455.6		0.65297	90744.5
0.65587	89824.5		0.65588	93017.9
0.65878	89817.6		0.65878	96083.9
0.6617	90993.3		0.6617	98589.7
0.6646	84614.1		0.66462	95940.9
0.66752	91391.7		0.66753	90920.5
0.67043	92326.4		0.67043	82862.8
0.67335	82200.9		0.67335	86393.8
0.67625	86165.5		0.67627	85274
0.67917	90459.9		0.67918	85357.1
0.68208	94511.1		0.68208	90958.9
0.685	92398.6		0.685	93594.4
0.68792	85973.3		0.68792	95431.6
0.69082	82530.5		0.69083	96474
0.69373	82164.2		0.69373	95556
0.69665	81893		0.69665	89036.1
0.69957	81336		0.69957	81812.8
0.70247	83354.1		0.70248	84829
0.70538	82633.6		0.70538	86150.3
0.7083	79810.9		0.7083	85197.9
0.71122	79356.3		0.71122	84039.1
0.71412	90572.6		0.71413	82835.5
0.71703	88606.8		0.71705	89598.9
0.71995	87726.3		0.71995	91588.8
0.72287	81286.9		0.72287	91950
0.72577	81016.8		0.72578	83032.3
0.72868	77467		0.7287	81433.2
0.7316	76496.1		0.7316	86221.6
0.73452	83360.1		0.73452	95122.8
0.73742	85821		0.73743	96520.6
0.74033	86590.1		0.74035	93656.8
0.74325	87251		0.74325	93363
0.74617	88980.4		0.74617	85063.5
0.74907	88303.8		0.74908	81555.8
0.75198	82928		0.752	89597.4
0.7549	79954.8		0.7549	84746.8
0.75782	76278.6		0.75782	84951.5
0.76072	81784.1		0.76073	83278.8
0.76363	89306.3		0.76365	85325.5
0.76655	92010.2		0.76655	98358.8
0.76947	87999.4		0.76947	95744.5
0.77237	81753.6		0.77238	89397.1
0.77528	85496.2		0.7753	87010.1
0.7782	82015.4		0.7782	88028.6
0.78112	86596.3		0.78112	81443.7
0.78402	85566.6		0.78403	84482.2
0.78693	86533.1		0.78695	83689.1
0.78985	83023.5		0.78985	79984.8
0.79277	83362.3		0.79277	85455.2
0.79568	83499.8		0.79568	89027
0.79858	81241.1		0.7986	90124.1
0.8015	82168.3		0.8015	87695.2
0.80442	81208.5		0.80442	89188
0.80733	82837.8		0.80733	90495.1
0.81023	78112.9		0.81025	86976.7
0.81315	77800.6		0.81317	81774.3
0.81607	78683.4		0.81607	84310.8
0.81898	84770.4		0.81898	85174.2
0.82188	84835.9		0.8219	87167.5
0.8248	87082.6		0.82482	84761.4
0.82772	83322.5		0.82772	85429.4
0.83063	77863.6		0.83063	84914.7
0.83353	79706		0.83355	84528
0.83645	81906.6		0.83647	88012.7
0.83937	74199.1		0.83937	83910.4
0.84228	78388.3		0.84228	82841.5
0.84518	74677.1		0.8452	82076.8
0.8481	81136.6		0.84812	84216.4
0.85102	79707.1		0.85102	84126.4
0.85393	80800.6		0.85393	79996.9
0.85683	84187.8		0.85685	79404.1
0.85975	84307.2		0.85977	79189.8
0.86267	81350.6		0.86267	80835.2
0.86558	79308.6		0.86558	78662.4
0.86848	82420.4		0.8685	78279.8
0.8714	82990.4		0.87142	85430.6
0.87432	79731.9		0.87432	84174.2
0.87723	81618.6		0.87723	85259.2
0.88013	81838.9		0.88015	84511.6
0.88305	91131		0.88307	82234.4
0.88597	84065.3		0.88597	85422.3
0.88888	84642.6		0.88888	84345.2
0.89178	80029.7		0.8918	89038.4
0.8947	81670.8		0.89472	84103.1
0.89762	80598.7		0.89762	85149.4
0.90053	77130.4		0.90053	83684.8
0.90345	75150		0.90345	85697.4
0.90635	78341.6		0.90637	86538.6
0.90927	78071.7		0.90927	89815.6
0.91218	80145		0.91218	87982.8
0.9151	78108		0.9151	81322.3
0.918	81222.5		0.91802	76280.2
0.92092	83490.7		0.92092	77499.4
0.92383	80474.9		0.92383	77919.4
0.92675	77160.8		0.92675	80346.9
0.92965	75741.5		0.92967	83728.5
0.93257	75434.4		0.93257	83441.1
0.93548	76635.6		0.93548	86050.5
0.9384	79987.9		0.9384	85991.1
0.9413	81192.4		0.94132	86250.2
0.94422	89628.3		0.94422	87091.1
0.94713	81903.4		0.94713	84403.3
0.95005	81416.5		0.95005	87731.4
0.95295	81525.1		0.95297	86865.7
0.95587	75396.3		0.95588	82037
0.95878	75983.7		0.95878	81634.8
0.9617	76344.9		0.9617	82888.6
0.9646	75602.8		0.96462	82900
0.96752	74654.4		0.96753	83537.3
0.97043	78061.8		0.97043	88714.7
0.97335	81458.3		0.97335	85381.9
0.97625	79959.6		0.97627	83117.8
0.97917	82376.2		0.97918	81534.9
0.98208	79757.6		0.98208	88055.5
0.985	75442.2		0.985	89812.9
0.9879	74152		0.98792	85675.6
0.99082	75487		0.99083	83071.2
0.99373	79899.9		0.99373	79166.1
0.99665	79777.4		0.99665	81041.7
0.99955	76787.5		0.99957	83323.4
1.00247	77198.1		1.00248	81390.6
1.00538	80136.8		1.00538	88274.1
1.0083	80984.8		1.0083	85832.1
1.0112	80199.3		1.01122	84897.2
1.01412	77057.5		1.01413	79099
1.01703	73778		1.01703	78727.9
1.01995	77847.6		1.01995	80883.4
1.02285	83500		1.02287	85215.6
1.02577	81078.6		1.02578	82301.8
1.02868	78694.6		1.02868	80922.4
1.0316	74855.2		1.0316	82367.8
1.0345	75247.5		1.03452	83244.6
1.03742	74343		1.03743	86347
1.04033	75193.5		1.04033	86061.7
1.04325	74152.7		1.04325	82354.8
1.04615	73924.1		1.04617	83185.2
1.04907	75677.5		1.04908	83797.3
1.05198	77690.9		1.05198	85295.8
1.0549	81505.2		1.0549	82307.7
1.0578	76087.5		1.05782	86685.1
1.06072	77102.8		1.06073	86217.4
1.06363	83152.5		1.06365	85217
1.06655	79937		1.06655	86310.5
1.06945	77723.5		1.06947	82080.2
1.07237	76209.6		1.07238	80965.3
1.07528	75449.6		1.0753	80941.3
1.0782	75793.6		1.0782	82525.2
1.0811	78388.1		1.08112	85447.9
1.08402	77759		1.08403	80337.8
1.08693	80476.2		1.08695	81104.3
1.08985	74550.7		1.08985	81509.1
1.09275	75313.1		1.09277	82516.9
1.09567	75290.9		1.09568	81101.7
1.09858	73907.4		1.0986	85646.4
1.1015	76470.9		1.1015	80219.2
1.1044	77608.3		1.10442	79834.8
1.10732	81765		1.10733	79927.2
1.11023	85883.6		1.11025	79441
1.11315	85356.3		1.11315	81960.2
1.11605	80016.9		1.11607	80066.2
1.11897	86379.7		1.11898	78080
1.12188	104123		1.1219	77655.2
1.1248	125990		1.1248	82395.8
1.1277	173848		1.12772	103390
1.13062	219615		1.13063	130290
1.13353	253240		1.13355	171677
1.13645	266658		1.13645	222093
1.13935	263772		1.13937	268137
1.14227	240847		1.14228	291181
1.14518	210683		1.1452	286272
1.1481	181467		1.1481	266187
1.151	158641		1.15102	222200
1.15392	144652		1.15393	179274
1.15683	142299		1.15685	151306
1.15975	152298		1.15975	145566
1.16265	168186		1.16267	139716
1.16557	168256		1.16558	147851
1.16848	174238		1.1685	147098
1.1714	190258		1.1714	161036
1.1743	196613		1.17432	165939
1.17722	209520		1.17723	174172
1.18013	218220		1.18015	184323
1.18305	217019		1.18305	201453
1.18595	217053		1.18597	203407
1.18887	227913		1.18888	209074
1.19178	233640		1.1918	231871
1.1947	237982		1.1947	233600
1.19762	235898		1.19762	239126
1.20052	239888		1.20053	235015
1.20343	240619		1.20345	223873
1.20635	242963		1.20635	239846
1.20927	231674		1.20927	245366
1.21217	222633		1.21218	244684
1.21508	214495		1.2151	243471
1.218	209872		1.218	230680
1.22092	205160		1.22092	223914
1.22382	206239		1.22383	235538
1.22673	209020		1.22675	227541
1.22965	215657		1.22967	230742
1.23257	213784		1.23257	211706
1.23548	209719		1.23548	214046
1.23838	210641		1.2384	210003
1.2413	212347		1.24132	213890
1.24422	229304		1.24422	211433
1.24713	294021		1.24713	221277
1.25003	427696		1.25005	253362
1.25295	629465		1.25297	371698
1.25587	828172		1.25587	647145
1.25878	964498		1.25878	1160674
1.26168	1024747		1.2617	1666354
1.2646	1021367		1.26462	2118460
1.26752	963424		1.26752	2294278
1.27043	866101		1.27043	2250653
1.27333	781773		1.27335	2041278
1.27625	712787		1.27627	1835496
1.27917	650046		1.27918	1617166
1.28208	577916		1.28208	1435694
1.28498	532179		1.285	1271233
1.2879	491258		1.28792	1139562
1.29082	464280		1.29083	1019155
1.29373	435621		1.29373	916115
1.29663	421131		1.29665	836510
1.29955	397712		1.29957	774405
1.30247	385574		1.30248	720705
1.30538	382700		1.30538	678838
1.3083	411650		1.3083	644152
1.3112	475581		1.31122	621873
1.31412	544411		1.31413	601199
1.31703	603857		1.31703	597550
1.31995	617836		1.31995	621082
1.32285	611727		1.32287	633661
1.32577	596232		1.32578	637731
1.32868	564668		1.3287	630555
1.3316	537900		1.3316	629150
1.3345	502715		1.33452	610089
1.33742	463000		1.33743	575140
1.34033	424050		1.34035	540728
1.34325	405046		1.34325	504130
1.34615	398815		1.34617	479702
1.34907	377927		1.34908	469325
1.35198	369492		1.352	452483
1.3549	355339		1.3549	430766
1.35782	345603		1.35782	414762
1.36072	337290		1.36073	409987
1.36363	332170		1.36365	393663
1.36655	327653		1.36655	379712
1.36947	323263		1.36947	345827
1.37237	311216		1.37238	334201
1.37528	298556		1.3753	334111
1.3782	282514		1.3782	307780
1.38112	282349		1.38112	301495
1.38402	277412		1.38403	300697
1.38693	277311		1.38695	290896
1.38985	264435		1.38987	277919
1.39277	253319		1.39277	264550
1.39567	251523		1.39568	261452
1.39858	260479		1.3986	266309
1.4015	268798		1.40152	265447
1.40442	262710		1.40442	262635
1.40732	258617		1.40733	256311
1.41023	257058		1.41025	251507
1.41315	264914		1.41317	253431
1.41607	256493		1.41607	282279
1.41898	252912		1.41898	331380
1.42188	251484		1.4219	349442
1.4248	255390		1.42482	374022
1.42772	253558		1.42772	394366
1.43063	249005		1.43063	381223
1.43353	245961		1.43355	356733
1.43645	249850		1.43647	332932
1.43937	253430		1.43937	302562
1.44228	246218		1.44228	283596
1.44518	243219		1.4452	263682
1.4481	238240		1.44812	250354
1.45102	247168		1.45103	247965
1.45393	247990		1.45393	245862
1.45683	246390		1.45685	236602
1.45975	251787		1.45977	226277
1.46267	245127		1.46268	217350
1.46558	243877		1.46558	207222
1.46848	237036		1.4685	208760
1.4714	237984		1.47142	201905
1.47432	243637		1.47433	191958
1.47723	236569		1.47723	192135
1.48015	231012		1.48015	177789
1.48305	236675		1.48307	176422
1.48597	260245		1.48598	175242
1.48888	274778		1.48888	184210
1.4918	290650		1.4918	219523
1.4947	304005		1.49472	283331
1.49762	309786		1.49763	363945
1.50053	310241		1.50053	459042
1.50345	306572		1.50345	513552
1.50635	291166		1.50637	523798
1.50927	280992		1.50928	513526
1.51218	280141		1.51218	473216
1.5151	279421		1.5151	446346
1.518	277157		1.51802	410419
1.52092	278258		1.52093	383552
1.52383	280747		1.52385	362328
1.52675	278959		1.52675	345678
1.52965	274327		1.52967	328249
1.53257	252910		1.53258	315484
1.53548	251594		1.5355	288721
1.5384	250767		1.5384	264011
1.5413	245282		1.54132	258658
1.54422	233986		1.54423	248920
1.54713	233929		1.54715	240471
1.55005	239768		1.55005	233083
1.55297	243192		1.55297	235398
1.55587	241190		1.55588	224696
1.55878	236349		1.5588	224475
1.5617	239010		1.5617	214269
1.56462	235405		1.56462	226863
1.56752	247764		1.56753	220478
1.57043	234641		1.57045	199102
1.57335	234733		1.57335	201794
1.57627	238073		1.57627	198738
1.57917	243869		1.57918	189500
1.58208	248722		1.5821	184985
1.585	246469		1.585	189067
1.58792	254924		1.58792	188151
1.59082	265318		1.59083	184664
1.59373	269219		1.59375	174329
1.59665	271777		1.59667	192147
1.59957	274048		1.59957	175067
1.60247	270285		1.60248	184366
1.60538	268190		1.6054	203414
1.6083	276511		1.60832	232955
1.61122	274674		1.61122	262611
1.61412	269774		1.61413	282216
1.61703	272668		1.61705	287912
1.61995	273127		1.61997	274247
1.62287	283371		1.62287	265562
1.62578	286626		1.62578	266471
1.62868	284947		1.6287	269457
1.6316	292753		1.63162	267132
1.63452	291061		1.63452	265576
1.63743	314064		1.63743	274420
1.64033	335254		1.64035	269797
1.64325	358055		1.64327	284801
1.64617	381730		1.64617	308188
1.64908	378118		1.64908	327398
1.65198	368829		1.652	348729
1.6549	345766		1.65492	355507
1.65782	326867		1.65782	348630
1.66073	314782		1.66073	334317
1.66363	308548		1.66365	313576
1.66655	298589		1.66657	291681
1.66947	289010		1.66948	282337
1.67238	280618		1.67238	280343
1.67528	270594		1.6753	276134
1.6782	271171		1.67822	260583
1.68112	263304		1.68113	257866
1.68403	258654		1.68403	253391
1.68693	263024		1.68695	252473
1.68985	259395		1.68987	246353
1.69277	264594		1.69278	238626
1.69568	258748		1.69568	225840
1.6986	252761		1.6986	223688
1.7015	245091		1.70152	221975
1.70442	241163		1.70443	212658
1.70733	244605		1.70733	208458
1.71025	250363		1.71025	219282
1.71315	258530		1.71317	198917
1.71607	256386		1.71608	196671
1.71898	256166		1.71898	191514
1.7219	252186		1.7219	191201
1.7248	246948		1.72482	195569
1.72772	247058		1.72773	197414
1.73063	252556		1.73063	199330
1.73355	263892		1.73355	193000
1.73645	289585		1.73647	190550
1.73937	342546		1.73938	212835
1.74228	447044		1.7423	237510
1.7452	694472		1.7452	280641
1.7481	1113439		1.74812	305554
1.75102	1700922		1.75103	333313
1.75393	2269817		1.75395	358694
1.75685	2779723		1.75685	380056
1.75975	3004331		1.75977	404123
1.76267	2951255		1.76268	406080
1.76558	2777911		1.7656	406690
1.7685	2536997		1.7685	400823
1.77142	2317927		1.77142	389369
1.77432	2103237		1.77433	363323
1.77723	1926368		1.77725	347574
1.78015	1766229		1.78015	321651
1.78307	1608197		1.78307	296597
1.78597	1462703		1.78598	280514
1.78888	1358770		1.7889	274496
1.7918	1283232		1.7918	270942
1.79472	1198101		1.79472	290445
1.79762	1129536		1.79763	681160
1.80053	1078590		1.80055	2356135
1.80345	1039667		1.80345	5289396
1.80637	1015733		1.80637	8357391
1.80927	1005466		1.80928	10200000
1.81218	1007774		1.8122	10700000
1.8151	978467		1.8151	10500000
1.81802	936136		1.81802	9772183
1.82092	900666		1.82093	8825578
1.82383	874729		1.82385	7923713
1.82675	837018		1.82677	7194335
1.82967	804654		1.82967	6519659
1.83257	782128		1.83258	5988366
1.83548	757688		1.8355	5486537
1.8384	718861		1.83842	5084695
1.84132	689878		1.84132	4778831
1.84423	678923		1.84423	4474333
1.84713	651074		1.84715	4198805
1.85005	637290		1.85007	3934709
1.85297	603263		1.85298	3746181
1.85588	581963		1.85588	3625571
1.85878	558637		1.8588	3453259
1.8617	553525		1.86172	3230933
1.86462	531730		1.86463	3073356
1.86753	519918		1.86753	2979415
1.87043	507643		1.87045	2902414
1.87335	500448		1.87337	2798154
1.87627	484682		1.87628	2710556
1.87918	480013		1.87918	2625327
1.88208	469046		1.8821	2546460
1.885	461020		1.88502	2443563
1.88792	444028		1.88793	2351197
1.89083	438416		1.89083	2280512
1.89373	430222		1.89375	2231586
1.89665	419536		1.89667	2181479
1.89957	425762		1.89958	2127820
1.90248	407362		1.90248	2055788
1.90538	410894		1.9054	2036176
1.9083	384789		1.90832	1992581
1.91122	382185		1.91123	1940090
1.91413	367449		1.91415	1866999
1.91703	365722		1.91705	1825730
1.91995	360514		1.91997	1806939
1.92287	364384		1.92288	1755369
1.92578	364554		1.9258	1709271
1.9287	358976		1.9287	1666051
1.9316	351386		1.93162	1647491
1.93452	335689		1.93453	1573592
1.93743	338536		1.93745	1534560
1.94035	335388		1.94035	1518960
1.94325	336740		1.94327	1502747
1.94617	315336		1.94618	1503541
1.94908	315474		1.9491	1468524
1.952	314392		1.952	1434396
1.9549	318870		1.95492	1411123
1.95782	317361		1.95783	1376744
1.96073	316007		1.96075	1331943
1.96365	314964		1.96367	1294433
1.96655	313444		1.96657	1281352
1.96947	301038		1.96948	1281480
1.97238	296488		1.9724	1260935
1.9753	303655		1.97532	1247274
1.9782	354082		1.97822	1217320
1.98112	538240		1.98113	1193969
1.98403	1129240		1.98405	1180507
1.98695	2216583		1.98697	1143726
1.98985	3431425		1.98987	1137663
1.99277	4344314		1.99278	1110438
1.99568	4743019		1.9957	1091579
1.9986	4689351		1.99862	1029432
2.00152	4411649		2.00152	946450
2.00442	4022739		2.00443	845388
2.00733	3641800		2.00735	744510
2.01025	3293389		2.01027	643674
2.01317	3019667		2.01317	571558
2.01607	2777172		2.01608	502597
2.01898	2552635		2.019	464682
2.0219	2368966		2.02192	425462
2.02482	2223866		2.02482	402887
2.02772	2089906		2.02773	369320
2.03063	1955573		2.03065	365532
2.03355	1833768		2.03357	345814
2.03647	1743086		2.03648	335091
2.03937	1668479		2.03938	325784
2.04228	1624326		2.0423	341022
2.0452	1560202		2.04522	334423
2.04812	1494198		2.04813	327130
2.05102	1430233		2.05103	321570
2.05393	1379006		2.05395	344524
2.05685	1337691		2.05687	519048
2.05977	1319691		2.05978	1062926
2.06267	1290927		2.06268	1913331
2.06558	1272150		2.0656	2769842
2.0685	1253787		2.06852	3296420
2.07142	1246335		2.07143	3443113
2.07433	1201537		2.07433	3324429
2.07723	1186908		2.07725	3134918
2.08015	1170434		2.08017	2925940
2.08307	1137841		2.08308	2699151
2.08598	1096857		2.08598	2465520
2.08888	1064650		2.0889	2250156
2.0918	1036781		2.09182	2080102
2.09472	1013333		2.09473	1944065
2.09763	990755		2.09765	1818167
2.10053	960911		2.10055	1699786
2.10345	923477		2.10347	1608814
2.10637	900961		2.10638	1532117
2.10928	876776		2.1093	1460213
2.11218	858584		2.1122	1388395
2.1151	841802		2.11512	1332078
2.11802	825603		2.11803	1268121
2.12093	810301		2.12095	1194642
2.12383	787624		2.12385	1156239
2.12675	761593		2.12677	1098525
2.12967	725377		2.12968	1069661
2.13258	694920		2.1326	1019773
2.13548	680514		2.1355	989334
2.1384	679747		2.13842	970460
2.14132	672402		2.14133	959822
2.14423	663217		2.14425	943951
2.14715	630352		2.14715	936853
2.15005	608683		2.15007	911260
2.15297	592786		2.15298	875645
2.15588	587952		2.1559	844130
2.1588	581051		2.15882	816380
2.1617	553550		2.16172	793265
2.16462	545694		2.16463	770309
2.16753	541155		2.16755	763953
2.17045	551974		2.17047	747903
2.17335	533439		2.17337	741523
2.17627	520355		2.17628	730179
2.17918	510076		2.1792	719373
2.1821	498221		2.18212	728628
2.185	485538		2.18502	708878
2.18792	482035		2.18793	684441
2.19083	478443		2.19085	674229
2.19375	462506		2.19377	672957
2.19665	457008		2.19667	669553
2.19957	449640		2.19958	660002
2.20248	445703		2.2025	655979
2.2054	437073		2.20542	636875
2.2083	418770		2.20832	626682
2.21122	421932		2.21123	605113
2.21413	418765		2.21415	600647
2.21705	412558		2.21707	589226
2.21997	402085		2.21998	577382
2.22287	399752		2.22288	580218
2.22578	389244		2.2258	576734
2.2287	386544		2.22872	555872
2.23162	397003		2.23163	549604
2.23452	385787		2.23453	545869
2.23743	380231		2.23745	553013
2.24035	363093		2.24037	527582
2.24327	358747		2.24328	508287
2.24617	361047		2.24618	491555
2.24908	354132		2.2491	484342
2.252	348345		2.25202	444667
2.25492	341802		2.25493	391404
2.25782	339325		2.25783	347254
2.26073	342295		2.26075	322061
2.26365	344451		2.26367	305365
2.26657	342741		2.26658	281569
2.26947	332034		2.26948	262268
2.27238	327819		2.2724	256526
2.2753	320497		2.27532	260798
2.27822	326525		2.27823	304168
2.28112	325115		2.28113	326411
2.28403	317901		2.28405	483501
2.28695	317217		2.28697	918835
2.28987	310677		2.28988	1691197
2.29278	314013		2.29278	2529949
2.29568	303200		2.2957	3006982
2.2986	301643		2.29862	2976064
2.30152	299543		2.30153	2579692
2.30443	294157		2.30445	2044876
2.30733	294410		2.30735	1660854
2.31025	293461		2.31027	1359579
2.31317	284499		2.31318	1133955
2.31608	282098		2.3161	975420
2.31898	284696		2.319	845709
2.3219	283497		2.32192	822866
2.32482	278015		2.32483	749528
2.32773	272613		2.32775	669697
2.33063	267665		2.33065	620312
2.33355	274726		2.33357	584360
2.33647	272144		2.33648	573277
2.33938	269064		2.3394	550296
2.34228	267060		2.3423	521192
2.3452	264638		2.34522	498255
2.34812	265350		2.34813	468375
2.35103	262922		2.35105	460925
2.35393	264740		2.35395	443447
2.35685	260636		2.35687	434954
2.35977	255900		2.35978	405171
2.36268	276049		2.3627	398511
2.36558	264129		2.3656	391535
2.3685	263858		2.36852	383516
2.37142	271480		2.37143	370302
2.37433	269744		2.37435	363094
2.37725	273541		2.37727	363700
2.38015	268483		2.38017	359110
2.38307	264141		2.38308	358050
2.38598	245177		2.386	351362
2.3889	241634		2.38892	349200
2.3918	238257		2.39182	345469
2.39472	244994		2.39473	327196
2.39763	235679		2.39765	318563
2.40055	240350		2.40057	317337
2.40345	232081		2.40347	323863
2.40637	242769		2.40638	334276
2.40928	237366		2.4093	329869
2.4122	236787		2.41222	332984
2.4151	236736		2.41512	332818
2.41802	235969		2.41803	324816
2.42093	237866		2.42095	312746
2.42385	236590		2.42387	314541
2.42675	221797		2.42677	316469
2.42967	223484		2.42968	318247
2.43258	227744		2.4326	305587
2.4355	232134		2.43552	309012
2.4384	228040		2.43842	301801
2.44132	220808		2.44133	295498
2.44423	224821		2.44425	282280
2.44715	215668		2.44717	290636
2.45005	219717		2.45008	279902
2.45297	218767		2.45298	277437
2.45588	238696		2.4559	276019
2.4588	223574		2.45882	270283
2.46172	210635		2.46173	261226
2.46462	209797		2.46463	263869
2.46753	216271		2.46755	255517
2.47045	219264		2.47047	248252
2.47337	243473		2.47338	243999
2.47627	536056		2.47628	260128
2.47918	1452387		2.4792	1132544
2.4821	2770876		2.48212	4545430
2.48502	3943589		2.48503	10100000
2.48792	4593801		2.48793	16000000
2.49083	4794319		2.49085	20200000
2.49375	4763674		2.49377	22900000
2.49667	4627488		2.49668	24500000
2.49957	4427170		2.49958	24700000
2.50248	4292717		2.5025	23700000
2.5054	4111321		2.50542	21900000
2.50832	3940048		2.50833	20000000
2.51122	3764293		2.51125	18200000
2.51413	3628912		2.51415	16700000
2.51705	3467964		2.51707	15700000
2.51997	3317868		2.51998	14700000
2.52288	3185381		2.5229	13800000
2.52578	3071048		2.5258	13100000
2.5287	2934441		2.52872	12400000
2.53162	2839534		2.53163	11900000
2.53453	2732353		2.53455	11400000
2.53743	2629272		2.53747	11000000
2.54035	2534897		2.54037	10500000
2.54327	2435914		2.54328	10100000
2.54618	2382042		2.5462	9757254
2.54908	2339083		2.54912	9490108
2.552	2308978		2.55202	9227361
2.55492	2239599		2.55493	8895984
2.55783	2167699		2.55785	8584917
2.56073	2119226		2.56077	8348016
2.56365	2082863		2.56368	8171331
2.56657	2038876		2.56658	7966912
2.56948	1976464		2.5695	7721784
2.57238	1904902		2.57242	7523583
2.5753	1850128		2.57533	7362973
2.57822	1801174		2.57823	7194384
2.58113	1787226		2.58115	6981977
2.58405	1757332		2.58407	6805872
2.58695	1730171		2.58698	6598039
2.58987	1703957		2.58988	6504701
2.59278	1661786		2.5928	6391469
2.5957	1641391		2.59572	6276082
2.5986	1616668		2.59863	6105820
2.60152	1581354		2.60155	5971752
2.60443	1554735		2.60445	5868514
2.60735	1490544		2.60737	5769517
2.61025	1448134		2.61028	5643097
2.61317	1401321		2.6132	5407323
2.61608	1335633		2.6161	5324413
2.619	1291185		2.61902	5330216
2.6219	1256408		2.62193	5223561
2.62482	1233938		2.62485	5174145
2.62773	1214053		2.62777	5084409
2.63065	1201920		2.63067	4983016
2.63357	1178259		2.63358	4861262
2.63647	1151096		2.6365	4818688
2.63938	1147786		2.63942	4761544
2.6423	1164078		2.64232	4678321
2.64522	1146211		2.64523	4545739
2.64812	1132662		2.64815	4486976
2.65103	1112329		2.65107	4398275
2.65395	1111043		2.65398	4255168
2.65687	1093036		2.65688	4042771
2.65977	1091055		2.6598	3762252
2.66268	1072011		2.66272	3421298
2.6656	1072877		2.66563	3017452
2.66852	1061338		2.66853	2652556
2.67142	1055411		2.67145	2277212
2.67433	1063835		2.67437	1934238
2.67725	1067509		2.67728	1592203
2.68017	1099575		2.68018	1415049
2.68307	1149408		2.6831	1216967
2.68598	1208609		2.68602	1058023
2.6889	1260280		2.68893	958514
2.69182	1313049		2.69183	859870
2.69473	1344250		2.69475	794266
2.69763	1320196		2.69767	717483
2.70055	1278187		2.70058	676105
2.70347	1235595		2.7035	642498
2.70638	1137340		2.7064	606059
2.70928	1050131		2.70932	546139
2.7122	1002534		2.71223	547741
2.71512	958113		2.71515	525890
2.71803	924615		2.71805	512143
2.72093	893661		2.72097	492698
2.72385	898202		2.72388	488792
2.72677	901224		2.7268	470891
2.72968	889434		2.7297	466987
2.73258	876812		2.73262	455593
2.7355	857963		2.73553	452621
2.73842	842478		2.73845	446046
2.74133	840698		2.74137	428102
2.74423	840723		2.74427	418066
2.74715	837896		2.74718	407603
2.75007	831241		2.7501	402914
2.75298	821674		2.75302	395849
2.7559	819428		2.75592	382734
2.7588	815389		2.75883	378813
2.76172	798202		2.76175	382312
2.76463	780632		2.76467	381235
2.76755	773550		2.76757	367309
2.77045	756550		2.77048	366880
2.77337	759888		2.7734	364754
2.77628	763392		2.77632	360742
2.7792	782380		2.77922	367221
2.7821	1085816		2.78213	356607
2.78502	2509065		2.78505	360229
2.78793	5729047		2.78797	372883
2.79085	10600000		2.79087	598915
2.79375	16100000		2.79378	1826598
2.79667	21200000		2.7967	4920470
2.79958	26000000		2.79962	9850369
2.8025	30300000		2.80253	15600000
2.8054	34300000		2.80543	21000000
2.80832	37900000		2.80835	25700000
2.81123	41300000		2.81127	29700000
2.81415	44400000		2.81418	33000000
2.81707	47200000		2.81708	35600000
2.81997	49800000		2.82	37600000
2.82288	52300000		2.82292	38600000
2.8258	54600000		2.82583	38100000
2.82872	56700000		2.82873	35900000
2.83162	58500000		2.83165	32700000
2.83453	60200000		2.83457	29300000
2.83745	61500000		2.83748	26100000
2.84037	63000000		2.8404	23700000
2.84327	64600000		2.8433	21800000
2.84618	65900000		2.84622	20600000
2.8491	67200000		2.84913	19600000
2.85202	68400000		2.85205	19200000
2.85493	69400000		2.85495	19100000
2.85783	70600000		2.85787	19200000
2.86075	71600000		2.86078	19300000
2.86367	72600000		2.8637	19100000
2.86658	73300000		2.86662	18600000
2.86948	74100000		2.86952	17900000
2.8724	74900000		2.87243	17100000
2.87532	75700000		2.87535	16200000
2.87823	76500000		2.87827	15300000
2.88113	77300000		2.88117	14500000
2.88405	78200000		2.88408	13800000
2.88697	79100000		2.887	13400000
2.88988	80000000		2.88992	12900000
2.89278	80700000		2.89283	12500000
2.8957	81200000		2.89573	12100000
2.89862	81800000		2.89865	11700000
2.90153	82400000		2.90157	11300000
2.90443	82300000		2.90448	11000000
2.90735	74900000		2.90738	10700000
2.91027	61700000		2.9103	10400000
2.91318	48700000		2.91322	10100000
2.9161	42900000		2.91613	9917268
2.919	41500000		2.91905	9586056
2.92192	40400000		2.92195	9390895
2.92483	39500000		2.92487	9197690
2.92775	38700000		2.92778	9111490
2.93065	38000000		2.9307	8942810
2.93357	37400000		2.9336	8752514
2.93648	36800000		2.93652	8528284
2.9394	36100000		2.93943	8359982
2.9423	35400000		2.94235	8181014
2.94522	34700000		2.94525	8045087
2.94813	34000000		2.94817	7883433
2.95105	33500000		2.95108	7747673
2.95397	33100000		2.954	7560546
2.95687	32600000		2.95692	7330608
2.95978	32100000		2.95982	6962197
2.9627	31600000		2.96273	6507086
2.96562	31300000		2.96565	5947108
2.96852	30800000		2.96857	5329295
2.97143	30300000		2.97147	4630549
2.97435	29800000		2.97438	3998890
2.97727	29300000		2.9773	3432519
2.98018	29000000		2.98022	2969885
2.98308	28700000		2.98312	2578001
2.986	28400000		2.98603	2254904
2.98892	28100000		2.98895	2004089
2.99183	27700000		2.99187	1801210
2.99473	27300000		2.99478	1685177
2.99765	26800000		2.99768	1558842
3.00057	26400000		3.0006	1501394
3.00348	26000000		3.00352	1416811
3.00638	25800000		3.00643	1370671
3.0093	25500000		3.00933	1309774
3.01222	25200000		3.01225	1287216
3.01513	24900000		3.01517	1259394
3.01805	24700000		3.01808	1221232
3.02095	24300000		3.02098	1169187
3.02387	24000000		3.0239	1096561
3.02678	23600000		3.02682	1031033
3.0297	23400000		3.02973	954464
3.0326	23200000		3.03263	926414
3.03552	22900000		3.03555	893492
3.03843	22600000		3.03847	855099
3.04135	22300000		3.04138	790938
3.04427	22000000		3.0443	758333
3.04717	21700000		3.0472	719901
3.05008	21500000		3.05012	717246
3.053	21200000		3.05303	697578
3.05592	21100000		3.05595	681582
3.05882	20900000		3.05885	680617
3.06173	20600000		3.06177	664758
3.06465	20300000		3.06468	648390
3.06757	19900000		3.0676	646032
3.07047	19600000		3.0705	644320
3.07338	19300000		3.07342	646820
3.0763	19100000		3.07633	636722
3.07922	18900000		3.07925	626013
3.08213	18700000		3.08215	597517
3.08503	18400000		3.08507	603175
3.08795	18100000		3.08798	598841
3.09087	17700000		3.0909	612383
3.09378	17300000		3.0938	596523
3.09668	17100000		3.09672	576761
3.0996	16900000		3.09963	582785
3.10252	16600000		3.10255	574521
3.10543	16400000		3.10545	557803
3.10833	16000000		3.10837	545968
3.11125	15700000		3.11128	537496
3.11417	15400000		3.1142	553316
3.11708	15100000		3.11712	556873
3.12	14800000		3.12002	566887
3.1229	14600000		3.12293	563854
3.12582	14400000		3.12585	568960
3.12873	14000000		3.12877	574840
3.13165	13700000		3.13167	576436
3.13455	13400000		3.13458	570819
3.13747	13100000		3.1375	561919
3.14038	12900000		3.14042	569698
3.1433	12700000		3.14332	580090
3.1462	12600000		3.14623	590643
3.14912	12400000		3.14915	595964
3.15203	12400000		3.15207	598598
3.15495	12300000		3.15497	597651
3.15787	12100000		3.15788	596657
3.16077	12000000		3.1608	596870
3.16368	11800000		3.16372	604454
3.1666	11800000		3.16662	596628
3.16952	11900000		3.16953	594594
3.17242	11900000		3.17245	606686
3.17533	12000000		3.17537	611005
3.17825	12000000		3.17827	612018
3.18117	12100000		3.18118	621858
3.18407	12200000		3.1841	619551
3.18698	12200000		3.18702	625673
3.1899	12400000		3.18993	638484
3.19282	12500000		3.19283	648674
3.19573	12600000		3.19575	648462
3.19863	12700000		3.19867	630789
3.20155	12800000		3.20158	635357
3.20447	12900000		3.20448	642587
3.20738	12900000		3.2074	663460
3.21028	12900000		3.21032	664754
3.2132	12700000		3.21323	664196
3.21612	12700000		3.21613	676137
3.21903	12600000		3.21905	688768
3.22193	12500000		3.22197	689132
3.22485	12400000		3.22488	687457
3.22777	12200000		3.22778	679610
3.23068	12200000		3.2307	690519
3.23358	12200000		3.23362	680664
3.2365	12200000		3.23653	636021
3.23942	12100000		3.23943	592949
3.24233	11900000		3.24235	562261
3.24525	11900000		3.24527	550337
3.24815	11900000		3.24818	537791
3.25107	11900000		3.2511	524112
3.25398	11900000		3.254	537797
3.2569	12000000		3.25692	541816
3.2598	12000000		3.25983	574173
3.26272	12100000		3.26275	628516
3.26563	12200000		3.26565	709583
3.26855	12200000		3.26857	781560
3.27145	12200000		3.27148	837516
3.27437	12100000		3.2744	855380
3.27728	11900000		3.2773	862136
3.2802	11800000		3.28022	838811
3.28312	11600000		3.28313	805450
3.28602	11500000		3.28605	777054
3.28893	11400000		3.28895	754683
3.29185	11200000		3.29187	704793
3.29477	11100000		3.29478	671850
3.29767	11000000		3.2977	649976
3.30058	10800000		3.3006	630003
3.3035	10800000		3.30352	607790
3.30642	10800000		3.30643	601758
3.30932	10700000		3.30935	575432
3.31223	10600000		3.31225	546062
3.31515	10600000		3.31517	516972
3.31807	10500000		3.31808	503215
3.32098	10400000		3.321	499532
3.32388	10400000		3.32392	493522
3.3268	10200000		3.32682	463275
3.32972	10200000		3.32973	450189
3.33263	10100000		3.33265	448252
3.33553	10000000		3.33557	457915
3.33845	9971420		3.33847	462189
3.34137	9860681		3.34138	456915
3.34428	9742030		3.3443	447619
3.34718	9747393		3.34722	423386
3.3501	9712247		3.35012	425767
3.35302	9669725		3.35303	420887
3.35593	9632940		3.35595	424882
3.35883	9563919		3.35887	411770
3.36175	9461684		3.36177	394574
3.36467	9374053		3.36468	388996
3.36758	9318644		3.3676	380517
3.3705	9313645		3.37052	406729
3.3734	9251942		3.37342	385991
3.37632	9173841		3.37633	392874
3.37923	9141459		3.37925	393134
3.38215	9107551		3.38217	385835
3.38505	9015094		3.38507	378357
3.38797	8875820		3.38798	367388
3.39088	8839389		3.3909	368871
3.3938	8823949		3.39382	369231
3.3967	8817105		3.39673	365198
3.39962	8807500		3.39963	366352
3.40253	8737773		3.40255	370410
3.40545	8631364		3.40547	371942
3.40835	8510851		3.40838	379975
3.41127	8436129		3.41128	394740
3.41418	8350639		3.4142	397903
3.4171	8312727		3.41712	418054
3.42002	8292448		3.42003	428241
3.42292	8272803		3.42293	436242
3.42583	8199660		3.42585	433401
3.42875	8114566		3.42877	421668
3.43167	8014432		3.43168	396622
3.43457	8005273		3.43458	380252
3.43748	8042005		3.4375	369755
3.4404	8035169		3.44042	372671
3.44332	7958143		3.44333	367187
3.44622	7864326		3.44623	358622
3.44913	7798670		3.44915	362961
3.45205	7782145		3.45207	361716
3.45497	7761824		3.45498	357326
3.45787	7697146		3.45788	347340
3.46078	7610652		3.4608	333966
3.4637	7574913		3.46372	332467
3.46662	7560016		3.46663	328219
3.46952	7548911		3.46955	324073
3.47243	7460820		3.47245	315534
3.47535	7403760		3.47537	312896
3.47827	7309821		3.47828	307544
3.48118	7300125		3.4812	312765
3.48408	7234324		3.4841	308020
3.487	7200513		3.48702	300028
3.48992	7173989		3.48993	288686
3.49283	7144940		3.49285	286636
3.49573	7084271		3.49575	291372
3.49865	7003442		3.49867	289997
3.50157	6973186		3.50158	294366
3.50448	6960100		3.5045	295737
3.50738	6967772		3.5074	285819
3.5103	6935022		3.51032	278124
3.51322	6867220		3.51323	269837
3.51613	6856008		3.51615	274517
3.51903	6797450		3.51905	282223
3.52195	6816260		3.52197	270226
3.52487	6749396		3.52488	275383
3.52778	6642918		3.5278	277027
3.53068	6473817		3.5307	270600
3.5336	6406526		3.53362	270758
3.53652	6321587		3.53653	271010
3.53943	6229145		3.53945	267882
3.54235	6126199		3.54235	276877
3.54525	5992401		3.54527	270472
3.54817	5884088		3.54818	275744
3.55108	5759830		3.5511	280865
3.554	5659370		3.55402	281515
3.5569	5592333		3.55692	280063
3.55982	5520456		3.55983	275250
3.56273	5419287		3.56275	245668
3.56565	5307766		3.56567	229423
3.56855	5169682		3.56857	229867
3.57147	5092029		3.57148	225158
3.57438	5073073		3.5744	220076
3.5773	5042692		3.57732	219058
3.5802	4951826		3.58022	211517
3.58312	4893817		3.58313	200174
3.58603	4829841		3.58605	207745
3.58895	4808190		3.58897	208265
3.59185	4764903		3.59187	205390
3.59477	4698280		3.59478	207043
3.59768	4657520		3.5977	203049
3.6006	4621238		3.60062	210230
3.60352	4603198		3.60352	209300
3.60642	4584250		3.60643	205102
3.60933	4568757		3.60935	203406
3.61225	4540835		3.61227	221994
3.61517	4513367		3.61517	233357
3.61807	4490893		3.61808	218246
3.62098	4468442		3.621	223586
3.6239	4425942		3.62392	232654
3.62682	4401369		3.62683	244355
3.62972	4370287		3.62973	241313
3.63263	4397719		3.63265	258713
3.63555	4408342		3.63557	247315
3.63847	4385041		3.63848	264313
3.64137	4348606		3.64138	269800
3.64428	4304690		3.6443	267817
3.6472	4329695		3.64722	277392
3.65012	4282277		3.65013	284392
3.65302	4284984		3.65303	289030
3.65593	4326393		3.65595	286285
3.65885	4348965		3.65887	302730
3.66177	4340287		3.66178	292971
3.66467	4308016		3.66468	276241
3.66758	4279616		3.6676	257286
3.6705	4226738		3.67052	234805
3.67342	4212778		3.67343	309235
3.67633	4181478		3.67633	682342
3.67923	4154977		3.67925	1217844
3.68215	4108234		3.68217	1730462
3.68507	4059421		3.68508	1992405
3.68798	4018119		3.68798	2025361
3.69088	3956040		3.6909	1943957
3.6938	3943616		3.69382	1789901
3.69672	3928773		3.69673	1653238
3.69963	3931100		3.69965	1522106
3.70253	3912065		3.70255	1439924
3.70545	3895441		3.70547	1355530
3.70837	3891224		3.70838	1291859
3.71128	3809502		3.7113	1252165
3.71418	3777403		3.7142	1224064
3.7171	3740462		3.71712	1183527
3.72002	3748194		3.72003	1139637
3.72293	3739042		3.72295	1111765
3.72583	3707188		3.72585	1063576
3.72875	3667582		3.72877	1030515
3.73167	3636779		3.73168	984677
3.73458	3639114		3.7346	954545
3.7375	3637789		3.7375	927645
3.7404	3614092		3.74042	901553
3.74332	3571473		3.74333	879997
3.74623	3524778		3.74625	856893
3.74915	3519716		3.74917	838989
3.75205	3528448		3.75207	810795
3.75497	3549241		3.75498	803360
3.75788	3559739		3.7579	785260
3.7608	3544340		3.76082	773748
3.7637	3495170		3.76372	750366
3.76662	3435814		3.76663	738080
3.76953	3428247		3.76955	724788
3.77245	3440688		3.77247	711445
3.77535	3454405		3.77537	681770
3.77827	3419287		3.77828	668830
3.78118	3389504		3.7812	653728
3.7841	3378585		3.78412	647036
3.787	3390082		3.78703	651534
3.78992	3341771		3.78993	635493
3.79283	3327737		3.79285	624468
3.79575	3313456		3.79577	596398
3.79865	3307494		3.79868	597150
3.80157	3271189		3.80158	576928
3.80448	3216657		3.8045	563422
3.8074	3222568		3.80742	545134
3.8103	3232678		3.81033	546870
3.81322	3235153		3.81323	529457
3.81613	3222007		3.81615	516207
3.81905	3217481		3.81907	502261
3.82197	3220374		3.82198	469200
3.82487	3232329		3.82488	460044
3.82778	3203091		3.8278	439328
3.8307	3167812		3.83072	420140
3.83362	3151334		3.83363	386838
3.83652	3163593		3.83653	366888
3.83943	3157773		3.83945	356968
3.84235	3154587		3.84237	332403
3.84527	3134307		3.84528	321431
3.84817	3140662		3.8482	318148
3.85108	3144957		3.8511	312703
3.854	3135968		3.85402	305883
3.85692	3122064		3.85693	291322
3.85982	3118051		3.85985	287272
3.86273	3096159		3.86275	283543
3.86565	3099825		3.86567	285710
3.86857	3101808		3.86858	284730
3.87147	3114870		3.8715	280746
3.87438	3105270		3.8744	282075
3.8773	3105987		3.87732	278070
3.88022	3074904		3.88023	287496
3.88312	3068316		3.88315	291083
3.88603	3061024		3.88605	287541
3.88895	3028822		3.88897	295220
3.89187	3020127		3.89188	301149
3.89478	3018963		3.8948	314921
3.89768	2987579		3.8977	292474
3.9006	2964853		3.90062	289681
3.90352	2973445		3.90353	286417
3.90643	2984062		3.90645	278234
3.90933	2989084		3.90935	264605
3.91225	2994694		3.91227	249491
3.91517	2978286		3.91518	235629
3.91808	2954930		3.9181	236004
3.92098	2930923		3.92102	234477
3.9239	2907832		3.92392	235379
3.92682	2903332		3.92683	232255
3.92973	2901648		3.92975	221938
3.93263	2906827		3.93267	218324
3.93555	2878175		3.93557	220178
3.93847	2850619		3.93848	208788
3.94138	2829244		3.9414	210043
3.94428	2827884		3.94432	200416
3.9472	2831599		3.94722	204465
3.95012	2830075		3.95013	208144
3.95303	2792228		3.95305	199456
3.95593	2796623		3.95597	197175
3.95885	2759047		3.95887	195840
3.96177	2800565		3.96178	197628
3.96468	2777193		3.9647	197499
3.9676	2771900		3.96762	194148
3.9705	2763807		3.97052	189923
3.97342	2734886		3.97343	180308
3.97633	2757825		3.97635	180041
3.97925	2773827		3.97927	179108
3.98215	2763815		3.98218	178268
3.98507	2755341		3.98508	178364
3.98798	2747831		3.988	169444
3.9909	2739106		3.99092	171529
3.9938	2750516		3.99383	177531
3.99672	2734772		3.99673	175923
3.99963	2743919		3.99965	169694
4.00255	2738118		4.00257	173698
4.00545	2713037		4.00548	169941
4.00837	2714673		4.00838	178349
4.01128	2729610		4.0113	183515
4.0142	2750352		4.01422	190139
4.0171	2754478		4.01713	196807
4.02002	2714053		4.02003	207427
4.02293	2672284		4.02295	216093
4.02585	2658714		4.02587	222857
4.02875	2682140		4.02878	227269
4.03167	2684796		4.03168	224653
4.03458	2692938		4.0346	221250
4.0375	2711234		4.03752	212056
4.04042	2704382		4.04043	216182
4.04332	2670828		4.04333	229826
4.04623	2639953		4.04625	225827
4.04915	2637509		4.04917	205045
4.05207	2641318		4.05208	200754
4.05497	2624884		4.055	198684
4.05788	2627106		4.0579	187549
4.0608	2589437		4.06082	193546
4.06372	2541401		4.06373	194355
4.06662	2607931		4.06665	190702
4.06953	2615327		4.06955	184958
4.07245	2596891		4.07247	183544
4.07537	2573684		4.07538	182181
4.07827	2562867		4.0783	183127
4.08118	2597662		4.0812	179648
4.0841	2587208		4.08412	172507
4.08702	2600519		4.08703	168030
4.08992	2586933		4.08995	164898
4.09283	2581140		4.09285	165356
4.09575	2575995		4.09577	172749
4.09867	2557450		4.09868	170164
4.10158	2532690		4.1016	177763
4.10448	2526001		4.1045	178358
4.1074	2518326		4.10742	171384
4.11032	2524939		4.11033	172852
4.11323	2495622		4.11325	170058
4.11613	2494237		4.11615	162124
4.11905	2495140		4.11907	160700
4.12197	2492694		4.12198	163718
4.12488	2507161		4.1249	168514
4.12778	2531553		4.12782	168637
4.1307	2545257		4.13072	163900
4.13362	2555749		4.13363	155750
4.13653	2548016		4.13655	165976
4.13943	2543017		4.13947	169431
4.14235	2537849		4.14237	190914
4.14527	2530957		4.14528	210354
4.14818	2537627		4.1482	237580
4.1511	2511749		4.15112	266302
4.154	2474175		4.15402	306866
4.15692	2464157		4.15693	338059
4.15983	2502679		4.15985	348279
4.16275	2494286		4.16277	354054
4.16565	2464888		4.16567	346622
4.16857	2460839		4.16858	343108
4.17148	2457699		4.1715	342060
4.1744	2444619		4.17442	318137
4.1773	2427949		4.17732	305081
4.18022	2406396		4.18023	289512
4.18313	2409928		4.18315	268847
4.18605	2419874		4.18607	254542
4.18895	2416099		4.18897	261213
4.19187	2436763		4.19188	256265
4.19478	2425025		4.1948	247684
4.1977	2417076		4.19772	236050
4.2006	2423450		4.20062	223824
4.20352	2447438		4.20353	221254
4.20643	2429486		4.20645	213706
4.20935	2408558		4.20937	215677
4.21225	2402298		4.21228	206081
4.21517	2389460		4.21518	201187
4.21808	2385671		4.2181	205847
4.221	2378139		4.22102	198952
4.22392	2382440		4.22393	202468
4.22682	2368298		4.22683	199790
4.22973	2366814		4.22975	193030
4.23265	2363646		4.23267	201751
4.23557	2346227		4.23558	191624
4.23847	2348999		4.23848	193031
4.24138	2340621		4.2414	188060
4.2443	2321254		4.24432	183379
4.24722	2345539		4.24723	181571
4.25012	2339783		4.25013	177246
4.25303	2328923		4.25305	172417
4.25595	2321653		4.25597	177141
4.25887	2322434		4.25888	173320
4.26177	2341468		4.26178	178455
4.26468	2357006		4.2647	186182
4.2676	2367390		4.26762	186961
4.27052	2386668		4.27053	185645
4.27342	2427181		4.27343	195704
4.27633	2460820		4.27635	205607
4.27925	2508759		4.27927	237779
4.28217	2528752		4.28218	265024
4.28507	2558359		4.2851	296666
4.28798	2570016		4.288	324729
4.2909	2598602		4.29092	366597
4.29382	2581545		4.29383	383147
4.29672	2554793		4.29675	422388
4.29963	2549460		4.29965	440492
4.30255	2546651		4.30257	446136
4.30547	2532759		4.30548	455963
4.30838	2502308		4.3084	456638
4.31128	2472146		4.3113	435747
4.3142	2447558		4.31422	441921
4.31712	2450208		4.31713	435763
4.32003	2458109		4.32005	431929
4.32293	2440882		4.32295	433728
4.32585	2422126		4.32587	426526
4.32877	2406060		4.32878	424578
4.33168	2395821		4.3317	426913
4.33458	2378711		4.3346	415529
4.3375	2358709		4.33752	417719
4.34042	2344320		4.34043	423829
4.34333	2351514		4.34335	412431
4.34623	2335501		4.34627	420734
4.34915	2322217		4.34917	414513
4.35207	2328379		4.35208	411271
4.35498	2346882		4.355	409539
4.35788	2319392		4.35792	397645
4.3608	2306451		4.36082	382722
4.36372	2281516		4.36373	393741
4.36663	2269213		4.36665	399463
4.36953	2273371		4.36957	383833
4.37245	2275657		4.37247	385777
4.37537	2277180		4.37538	382037
4.37828	2297565		4.3783	375035
4.3812	2281667		4.38122	367541
4.3841	2299778		4.38413	359745
4.38702	2277033		4.38703	365083
4.38993	2291928		4.38995	363051
4.39285	2273493		4.39287	342494
4.39575	2254031		4.39578	316548
4.39867	2241747		4.39868	300402
4.40158	2213364		4.4016	282669
4.4045	2217029		4.40452	257225
4.4074	2209026		4.40743	224184
4.41032	2210111		4.41033	199354
4.41323	2195875		4.41325	179717
4.41615	2195799		4.41617	162950
4.41905	2189666		4.41908	152833
4.42197	2202320		4.422	138564
4.42488	2171289		4.4249	128924
4.4278	2166500		4.42782	138782
4.4307	2151617		4.43073	129003
4.43362	2168837		4.43365	129465
4.43653	2187455		4.43655	125819
4.43945	2192303		4.43947	130748
4.44235	2190169		4.44238	131258
4.44527	2172883		4.4453	128708
4.44818	2138561		4.4482	129925
4.4511	2131258		4.45112	132564
4.45402	2084377		4.45403	130165
4.45692	2142774		4.45695	131446
4.45983	2141598		4.45985	132095
4.46275	2145319		4.46277	138398
4.46567	2138152		4.46568	136567
4.46857	2130571		4.4686	143861
4.47148	2135777		4.4715	142964
4.4744	2113446		4.47442	151553
4.47732	2109189		4.47733	163337
4.48022	2121252		4.48025	166741
4.48313	2112171		4.48317	159472
4.48605	2089854		4.48607	158723
4.48897	2088206		4.48898	157122
4.49187	2074364		4.4919	162583
4.49478	2072495		4.49482	164806
4.4977	2068074		4.49772	161477
4.50062	2043157		4.50063	162072
4.50352	2040006		4.50355	181191
4.50643	2042876		4.50647	169751
4.50935	2072522		4.50937	162850
4.51227	2064694		4.51228	165746
4.51518	2049466		4.5152	170454
4.51808	2024277		4.51812	172666
4.521	2019334		4.52102	169182
4.52392	2005318		4.52393	171086
4.52683	2020980		4.52685	175130
4.52973	2027478		4.52977	172713
4.53265	2010073		4.53267	170810
4.53557	1992081		4.53558	164494
4.53848	1981633		4.5385	160497
4.54138	1987068		4.54142	159840
4.5443	1972220		4.54433	164702
4.54722	1974555		4.54723	162777
4.55013	1979988		4.55015	168809
4.55303	1993536		4.55307	170727
4.55595	1974910		4.55598	175842
4.55887	1956966		4.55888	171864
4.56178	1952781		4.5618	173010
4.56468	1948243		4.56472	161893
4.5676	1952153		4.56763	155243
4.57052	1954707		4.57053	157129
4.57343	1940475		4.57345	150224
4.57633	1946052		4.57637	159526
4.57925	1932641		4.57928	151570
4.58217	1946052		4.58218	158740
4.58508	1946027		4.5851	150954
4.588	1937003		4.58802	155867
4.5909	1928833		4.59093	143039
4.59382	1899244		4.59383	139758
4.59673	1875916		4.59675	132646
4.59965	1869520		4.59967	132023
4.60255	1888948		4.60258	130603
4.60547	1882615		4.60548	131139
4.60838	1875717		4.6084	125353
4.6113	1860424		4.61132	123601
4.6142	1870464		4.61423	121903
4.61712	1859318		4.61715	123928
4.62003	1846555		4.62005	126247
4.62295	1833832		4.62297	125048
4.62585	1827096		4.62588	129089
4.62877	1820261		4.6288	132943
4.63168	1815295		4.6317	138112
4.6346	1813483		4.63462	139280
4.6375	1816218		4.63753	133430
4.64042	1811403		4.64045	129490
4.64333	1825430		4.64335	130720
4.64625	1829819		4.64627	130115
4.64915	1826194		4.64918	128780
4.65207	1830120		4.6521	134109
4.65498	1807547		4.655	134022
4.6579	1794056		4.65792	136940
4.66082	1770215		4.66083	135278
4.66372	1767977		4.66375	130007
4.66663	1746632		4.66665	129640
4.66955	1752045		4.66957	126395
4.67247	1732021		4.67248	131590
4.67537	1762267		4.6754	124380
4.67828	1747321		4.6783	125167
4.6812	1728608		4.68122	130903
4.68412	1713382		4.68413	119820
4.68702	1707285		4.68705	118354
4.68993	1692652		4.68997	115785
4.69285	1684000		4.69287	118667
4.69577	1675239		4.69578	119070
4.69867	1681578		4.6987	120722
4.70158	1669522		4.70162	118460
4.7045	1670319		4.70452	115986
4.70742	1659573		4.70743	118491
4.71032	1662868		4.71035	120210
4.71323	1672109		4.71327	129614
4.71615	1678318		4.71617	130788
4.71907	1669834		4.71908	123671
4.72197	1621231		4.722	116310
4.72488	1611607		4.72492	121238
4.7278	1607124		4.72782	116438
4.73072	1622053		4.73073	117826
4.73363	1612066		4.73365	120092
4.73653	1592014		4.73657	125172
4.73945	1588210		4.73947	120733
4.74237	1567997		4.74238	115515
4.74528	1544887		4.7453	113341
4.74818	1548128		4.74822	115770
4.7511	1532140		4.75112	125023
4.75402	1539341		4.75403	126512
4.75693	1543689		4.75695	120220
4.75983	1543963		4.75987	132686
4.76275	1537744		4.76278	122764
4.76567	1532786		4.76568	127282
4.76858	1520269		4.7686	129297
4.77148	1503954		4.77152	132385
4.7744	1494203		4.77443	129616
4.77732	1487545		4.77733	124876
4.78023	1482690		4.78025	123153
4.78313	1485288		4.78317	128950
4.78605	1468471		4.78608	134365
4.78897	1480831		4.78898	125402
4.79188	1474275		4.7919	127840
4.79478	1455311		4.79482	124293
4.7977	1443028		4.79773	123746
4.80062	1427017		4.80063	122867
4.80353	1403878		4.80355	123659
4.80643	1382418		4.80647	121098
4.80935	1386161		4.80938	122808
4.81227	1376251		4.81228	124877
4.81518	1379706		4.8152	118083
4.8181	1377794		4.81812	115990
4.821	1369779		4.82103	112571
4.82392	1360036		4.82393	117299
4.82683	1341325		4.82685	114934
4.82975	1350951		4.82977	123146
4.83265	1344365		4.83268	122921
4.83557	1334788		4.8356	114782
4.83848	1310109		4.8385	113306
4.8414	1292195		4.84142	111570
4.8443	1300949		4.84433	113284
4.84722	1291617		4.84725	120719
4.85013	1283993		4.85015	125215
4.85305	1287858		4.85307	133459
4.85595	1295995		4.85598	114079
4.85887	1257772		4.8589	117403
4.86178	1162105		4.8618	115930
4.8647	1051329		4.86472	117595
4.8676	970930		4.86763	113222
4.87052	950183		4.87055	123128
4.87343	938045		4.87345	120601
4.87635	923527		4.87637	110573
4.87925	890444		4.87928	108284
4.88217	888145		4.8822	110038
4.88508	895769		4.8851	110297
4.888	878936		4.88802	108054
4.89092	856300		4.89093	107475
4.89382	844194		4.89385	120540
4.89673	866669		4.89675	105755
4.89965	854765		4.89967	103958
4.90257	846965		4.90258	100440
4.90547	839704		4.9055	103536
4.90838	828993		4.90842	106401
4.9113	829968		4.91132	105845
4.91422	804856		4.91423	107052
4.91712	795600		4.91715	108085
4.92003	795215		4.92007	108812
4.92295	796503		4.92297	105632
4.92587	796912		4.92588	114807
4.92877	794670		4.9288	110968
4.93168	774260		4.93172	104908
4.9346	778723		4.93462	109608
4.93752	778949		4.93753	110964
4.94042	775832		4.94045	107189
4.94333	761995		4.94337	101326
4.94625	765691		4.94627	103268
4.94917	752852		4.94918	108925
4.95207	735522		4.9521	112369
4.95498	739824		4.95502	110450
4.9579	724499		4.95792	108523
4.96082	727042		4.96083	108427
4.96373	717831		4.96375	114166
4.96663	728796		4.96667	114214
4.96955	721100		4.96957	116086
4.97247	727783		4.97248	116241
4.97538	730271		4.9754	120510
4.97828	729205		4.97832	124060
4.9812	726449		4.98123	124066
4.98412	713530		4.98413	118568
4.98703	717466		4.98705	118624
4.98993	715768		4.98997	118358
4.99285	723293		4.99288	115193
4.99577	693309		4.99578	118825
4.99868	691169		4.9987	121776
5.00158	681546		5.00162	123493
5.0045	675855		5.00453	123122
5.00742	660449		5.00743	114561
5.01033	656858		5.01035	116231
5.01323	642476		5.01327	119086
5.01615	631377		5.01618	120279
5.01907	633280		5.01908	116124
5.02198	617740		5.022	115610
5.02488	599391		5.02492	115149
5.0278	601295		5.02783	120040
5.03072	605276		5.03073	118664
5.03363	598546		5.03365	121060
5.03655	601664		5.03657	135550
5.03945	600427		5.03948	147316
5.04237	594094		5.04238	156043
5.04528	585529		5.0453	156026
5.0482	575990		5.04822	161706
5.0511	567475		5.05113	166457
5.05402	562095		5.05403	166092
5.05693	560100		5.05695	171470
5.05985	549855		5.05987	165398
5.06275	542718		5.06278	159791
5.06567	546300		5.0657	159709
5.06858	541068		5.0686	152164
5.0715	538582		5.07152	144066
5.0744	547865		5.07443	149980
5.07732	543642		5.07735	155811
5.08023	555902		5.08025	153866
5.08315	563422		5.08317	152076
5.08605	588411		5.08608	159918
5.08897	615658		5.089	167763
5.09188	663650		5.0919	174363
5.0948	718769		5.09482	190064
5.0977	789710		5.09773	217201
5.10062	845942		5.10065	255267
5.10353	873468		5.10355	303591
5.10645	896103		5.10647	343094
5.10935	891181		5.10938	392236
5.11227	901173		5.1123	441907
5.11518	881921		5.1152	491491
5.1181	856492		5.11812	493111
5.121	819424		5.12103	484123
5.12392	780824		5.12395	477500
5.12683	755223		5.12685	477841
5.12975	731486		5.12977	451611
5.13267	702068		5.13268	425038
5.13557	681574		5.1356	417828
5.13848	650229		5.1385	391004
5.1414	646906		5.14142	363283
5.14432	625672		5.14433	347881
5.14722	613843		5.14725	335694
5.15013	600655		5.15015	329899
5.15305	581827		5.15307	327957
5.15597	581598		5.15598	308256
5.15887	576209		5.1589	290310
5.16178	577721		5.16182	278455
5.1647	575475		5.16472	264984
5.16762	569078		5.16763	264529
5.17052	555359		5.17055	264332
5.17343	544412		5.17347	273471
5.17635	531447		5.17637	248924
5.17927	521738		5.17928	246397
5.18217	517315		5.1822	239695
5.18508	509904		5.18512	245387
5.188	494257		5.18802	233388
5.19092	497329		5.19093	239845
5.19382	501474		5.19385	231659
5.19673	498361		5.19677	221287
5.19965	494342		5.19967	212200
5.20257	475835		5.20258	207429
5.20547	472976		5.2055	193109
5.20838	473912		5.20842	182232
5.2113	465181		5.21132	175111
5.21422	469414		5.21423	165698
5.21713	475267		5.21715	155895
5.22003	465610		5.22007	142164
5.22295	452121		5.22297	133538
5.22587	443908		5.22588	137860
5.22878	447404		5.2288	127674
5.23168	461636		5.23172	127677
5.2346	446440		5.23463	122790
5.23752	445781		5.23753	124964
5.24043	450771		5.24045	125358
5.24333	444981		5.24337	122558
5.24625	438672		5.24628	118116
5.24917	440149		5.24918	120302
5.25208	428912		5.2521	115485
5.25498	436252		5.25502	113173
5.2579	424874		5.25793	115801
5.26082	431737		5.26083	116820
5.26373	437481		5.26375	110806
5.26663	456518		5.26667	115955
5.26955	475199		5.26958	117506
5.27247	504476		5.27248	123597
5.27538	544528		5.2754	131452
5.27828	579981		5.27832	141141
5.2812	613495		5.28123	154530
5.28412	643152		5.28413	171421
5.28703	662377		5.28705	185644
5.28993	680965		5.28997	199114
5.29285	684417		5.29288	223315
5.29577	740546		5.29578	245084
5.29868	696378		5.2987	248859
5.30158	688967		5.30162	253607
5.3045	666451		5.30453	264073
5.30742	650308		5.30743	262403
5.31033	641640		5.31035	261014
5.31323	631301		5.31327	257328
5.31615	623705		5.31618	252377
5.31907	603677		5.3191	244354
5.32198	569051		5.322	230630
5.3249	553703		5.32492	226643
5.3278	535396		5.32783	215694
5.33072	509401		5.33075	206187
5.33363	501408		5.33365	212087
5.33655	503270		5.33657	205891
5.33945	495279		5.33948	196981
5.34237	480187		5.3424	192564
5.34528	474327		5.3453	191730
5.3482	481931		5.34822	182144
5.3511	463430		5.35113	179143
5.35402	465058		5.35405	191718
5.35693	461402		5.35695	195469
5.35985	461362		5.35987	209315
5.36275	456178		5.36278	205377
5.36567	443476		5.3657	213969
5.36858	438313		5.3686	209515
5.3715	435845		5.37152	198089
5.3744	433292		5.37443	196908
5.37732	424933		5.37735	194664
5.38023	425493		5.38025	196812
5.38315	424660		5.38317	191036
5.38605	425363		5.38608	178877
5.38897	424921		5.389	176969
5.39188	424919		5.3919	180868
5.3948	437541		5.39482	169710
5.3977	422266		5.39773	172076
5.40062	405991		5.40065	168943
5.40353	404240		5.40355	164072
5.40645	403979		5.40647	164146
5.40937	411205		5.40938	166008
5.41227	408956		5.4123	167852
5.41518	401822		5.41522	169177
5.4181	390057		5.41812	167152
5.42102	385007		5.42103	163978
5.42392	391837		5.42395	165852
5.42683	391268		5.42687	155150
5.42975	396300		5.42977	158693
5.43267	398622		5.43268	159168
5.43557	392547		5.4356	150664
5.43848	392129		5.43852	140744
5.4414	392816		5.44142	144659
5.44432	380326		5.44433	149007
5.44722	387577		5.44725	140257
5.45013	384733		5.45017	137417
5.45305	374524		5.45307	140888
5.45597	363278		5.45598	135203
5.45887	365049		5.4589	136532
5.46178	366421		5.46182	128713
5.4647	389194		5.46472	123059
5.46762	391081		5.46763	122339
5.47052	384494		5.47055	121052
5.47343	368646		5.47347	120623
5.47635	361907		5.47637	121094
5.47927	361884		5.47928	125125
5.48217	364367		5.4822	123646
5.48508	411151		5.48512	131930
5.488	536203		5.48803	130213
5.49092	824868		5.49093	125586
5.49382	1409364		5.49385	123209
5.49673	2365574		5.49677	122653
5.49965	3746466		5.49968	122846
5.50257	5373268		5.50258	119086
5.50547	7042512		5.5055	119957
5.50838	8443388		5.50842	124142
5.5113	9513023		5.51133	131738
5.51422	10100000		5.51423	148012
5.51712	10300000		5.51715	183996
5.52003	10100000		5.52007	259343
5.52295	9636281		5.52298	377078
5.52587	8982931		5.52588	537530
5.52878	8233680		5.5288	721616
5.53168	7563472		5.53172	911801
5.5346	6969918		5.53463	1076008
5.53752	6439761		5.53753	1223383
5.54043	6029860		5.54045	1309438
5.54333	5669399		5.54337	1339902
5.54625	5341099		5.54628	1316906
5.54917	5057733		5.54918	1248954
5.55208	4815796		5.5521	1193250
5.55498	4562168		5.55502	1116023
5.5579	4314109		5.55793	1054353
5.56082	4136760		5.56083	990358
5.56373	3950633		5.56375	943539
5.56663	3775743		5.56667	889710
5.56955	3590345		5.56958	849665
5.57247	3471589		5.5725	810672
5.57538	3353421		5.5754	784429
5.57828	3277993		5.57832	747350
5.5812	3137677		5.58123	699851
5.58412	3028138		5.58415	664992
5.58703	2919535		5.58705	656191
5.58993	2857854		5.58997	657038
5.59285	2748922		5.59288	633714
5.59577	2673251		5.5958	606262
5.59868	2608723		5.5987	601017
5.60158	2551701		5.60162	575148
5.6045	2465077		5.60453	556765
5.60742	2420528		5.60745	512805
5.61033	2363629		5.61035	489287
5.61323	2319627		5.61327	474728
5.61615	2280139		5.61618	451052
5.61907	2242988		5.6191	425475
5.62198	2202289		5.622	392170
5.6249	2155684		5.62492	358501
5.6278	2090111		5.62783	326478
5.63072	2038892		5.63075	292306
5.63363	2009132		5.63367	256876
5.63655	1939207		5.63657	233040
5.63945	1925246		5.63948	212150
5.64237	1868635		5.6424	195851
5.64528	1844481		5.64532	182519
5.6482	1770177		5.64822	176989
5.6511	1740471		5.65113	169279
5.65402	1732362		5.65405	155102
5.65693	1743770		5.65697	150429
5.65985	1702610		5.65987	151622
5.66275	1647056		5.66278	148905
5.66567	1617783		5.6657	149561
5.66858	1604645		5.66862	142698
5.6715	1599250		5.67152	141900
5.6744	1543455		5.67443	136498
5.67732	1528133		5.67735	133276
5.68023	1502350		5.68027	137927
5.68315	1550902		5.68317	140427
5.68605	1505395		5.68608	139752
5.68897	1453856		5.689	134643
5.69188	1415139		5.69192	130709
5.6948	1385210		5.69482	129489
5.6977	1397788		5.69773	125850
5.70062	1404211		5.70065	121912
5.70353	1384444		5.70357	119037
5.70645	1348782		5.70648	121691
5.70935	1334265		5.70938	123408
5.71227	1311043		5.7123	126099
5.71518	1296504		5.71522	124796
5.7181	1278257		5.71813	123717
5.721	1258285		5.72103	129941
5.72392	1255976		5.72395	126920
5.72683	1258846		5.72687	126563
5.72975	1243926		5.72978	124175
5.73265	1241654		5.73268	120663
5.73557	1217149		5.7356	114038
5.73848	1200106		5.73852	113829
5.7414	1186999		5.74143	112881
5.74432	1177851		5.74433	113432
5.74722	1164607		5.74725	116862
5.75013	1147977		5.75017	118347
5.75305	1140539		5.75308	121815
5.75597	1139972		5.75598	116972
5.75887	1132152		5.7589	122806
5.76178	1131486		5.76182	120897
5.7647	1115380		5.76473	121147
5.76762	1114557		5.76763	125028
5.77052	1125850		5.77055	117479
5.77343	1143085		5.77347	128030
5.77635	1170581		5.77638	133187
5.77927	1271736		5.77928	140223
5.78217	1389879		5.7822	165156
5.78508	1618572		5.78512	214430
5.788	1888454		5.78803	289722
5.79092	2207088		5.79095	422247
5.79382	2566812		5.79385	613073
5.79673	2900526		5.79677	857535
5.79965	3226653		5.79968	1165078
5.80257	3494326		5.8026	1574857
5.80547	3682027		5.8055	2004059
5.80838	3721714		5.80842	2460502
5.8113	3701715		5.81133	2891509
5.81422	3586946		5.81425	3285226
5.81712	3445159		5.81715	3587826
5.82003	3262467		5.82007	3749113
5.82295	3130798		5.82298	3798455
5.82587	2975490		5.8259	3713638
5.82877	2816616		5.8288	3568964
5.83168	2659462		5.83172	3384075
5.8346	2556809		5.83463	3196863
5.83752	2482521		5.83755	2994250
5.84043	2423612		5.84045	2837843
5.84333	2355673		5.84337	2697273
5.84625	2292122		5.84628	2542062
5.84917	2248816		5.8492	2387180
5.85208	2204434		5.8521	2284951
5.85498	2144244		5.85502	2174045
5.8579	2094773		5.85793	2087182
5.86082	2067452		5.86085	2012947
5.86373	2040704		5.86377	1977579
5.86663	2000838		5.86667	1926496
5.86955	1944420		5.86958	1858727
5.87247	1874380		5.8725	1785770
5.87538	1818870		5.87542	1696125
5.87828	1758535		5.87832	1622245
5.8812	1712181		5.88123	1536823
5.88412	1705738		5.88415	1441923
5.88703	1661167		5.88707	1335943
5.88993	1622514		5.88997	1233044
5.89285	1590094		5.89288	1103786
5.89577	1587076		5.8958	994649
5.89868	1533963		5.89872	874616
5.90158	1490761		5.90162	745150
5.9045	1447891		5.90453	641537
5.90742	1422767		5.90745	564363
5.91033	1390420		5.91037	498646
5.91325	1359885		5.91327	434223
5.91615	1322812		5.91618	389298
5.91907	1267375		5.9191	358256
5.92198	1235832		5.92202	347770
5.9249	1179044		5.92492	312953
5.9278	1132705		5.92783	289023
5.93072	1091670		5.93075	277199
5.93363	1049981		5.93367	269922
5.93655	1017086		5.93657	262830
5.93945	972887		5.93948	262291
5.94237	954069		5.9424	249827
5.94528	920464		5.94532	237578
5.9482	898393		5.94823	231264
5.9511	869623		5.95113	231127
5.95402	865075		5.95405	230543
5.95693	876806		5.95697	222167
5.95985	836536		5.95988	204849
5.96275	837904		5.96278	207469
5.96567	825542		5.9657	199357
5.96858	808982		5.96862	206589
5.9715	815144		5.97153	199237
5.9744	798096		5.97443	193229
5.97732	789868		5.97735	190747
5.98023	760584		5.98027	189085
5.98315	736714		5.98318	180244
5.98605	728724		5.98608	183731
5.98897	721077		5.989	177902
5.99188	720827		5.99192	180577
5.9948	707425		5.99483	184841
5.9977	706464		5.99773	180978
6.00062	707762		6.00065	186121
6.00353	706180		6.00357	181507
6.00645	697600		6.00648	182245
6.00935	686820		6.00938	181425
6.01227	668063		6.0123	180114
6.01518	662188		6.01522	175988
6.0181	655581		6.01813	185400
[truncated: 8,578 more rows]

## Sheet: Figure 2 figure supplements
Figure 2-figure supplement 1A				Figure 2-figure supplement 1B				Figure 2-figure supplement 1C				Figure 2-figure supplement 1D				Figure 2-figure supplement 1E				Figure 2-figure supplement 1F				Figure 2-figure supplement 1G				Figure 2-figure supplement 1I
X	Y			X	Y			X	Y			X	Y			Moles	Area			+ LEU	- LEU			+ LEU	- LEU			WT
0.20153	150558			0.20153	115646			0.20153	82320.5			0.20153	116753			3.6e-05	916000000			5.28e-06	1.2e-06			1.36858e-06	1.12e-06			0.515152
0.20445	88337.2			0.20445	67342.9			0.20445	47724.2			0.20445	67683.8			1.8e-05	607000000			6.53e-06	1.24e-06			1.49173e-06	1.11e-06			0.741935
0.20737	0			0.20737	0			0.20737	0			0.20737	0			8.99e-06	439000000			5.98e-06	1.2e-06			1.42049e-06	1.14e-06			0.466667
0.21027	0			0.21027	0			0.21027	0			0.21027	0			4.5e-06	350000000											0.333333
0.21318	0			0.21318	0			0.21318	0			0.21318	0			2.25e-06	294000000											0.319149
0.2161	0			0.2161	0			0.2161	0			0.2161	0															0.435897
0.219	0			0.219	0			0.219	0			0.219	0															0.434783
0.22192	0			0.22192	0			0.22192	0			0.22192	0															0.481481
0.22483	0			0.22483	0			0.22483	0			0.22483	0															0.333333
0.22773	0			0.22773	0			0.22773	0			0.22773	0															0.085714
0.23065	0			0.23065	0			0.23065	0			0.23065	0															0.282051
0.23357	0			0.23357	0			0.23357	0			0.23357	0															0.096774
0.23647	0			0.23647	0			0.23647	0			0.23647	0															-0.06897
0.23938	0			0.23938	0			0.23938	0			0.23938	0															0.272727
0.2423	0			0.2423	228.485			0.2423	0			0.2423	0															0.657143
0.2452	0			0.2452	261.754			0.2452	0			0.2452	0															0.102041
0.24812	0			0.24812	228.958			0.24812	0			0.24812	242.776
0.25103	403.018			0.25103	905.282			0.25103	702.489			0.25103	276.82
0.25393	2776.39			0.25393	1774.22			0.25393	1017.12			0.25393	1077.76
0.25685	5121.52			0.25685	6881.51			0.25685	3679.47			0.25685	3295.62
0.25977	11694.9			0.25977	17589.2			0.25977	7144.64			0.25977	7959.33
0.26267	21399.6			0.26267	36800.9			0.26267	12848.3			0.26267	15992
0.26558	37095			0.26558	68674			0.26558	19426.5			0.26558	26371
0.2685	49305.3			0.2685	101724			0.2685	30092.8			0.2685	37431.8
0.2714	69202.3			0.2714	136607			0.2714	42900.5			0.2714	46349.3
0.27432	85582.3			0.27432	154273			0.27432	53758.9			0.27432	51660.9
0.27723	95257.2			0.27723	174221			0.27723	64076.4			0.27723	57133
0.28013	95040.2			0.28015	201435			0.28013	66120.6			0.28013	60181.8
0.28305	107430			0.28305	230148			0.28305	75036.3			0.28305	69113.7
0.28597	118609			0.28597	252226			0.28597	76379.6			0.28597	72099.6
0.28888	122529			0.28888	254507			0.28888	86548.1			0.28888	80227.7
0.29178	124415			0.2918	274680			0.29178	86322.6			0.29178	85084.3
0.2947	128825			0.2947	291702			0.2947	89285.2			0.2947	85412.6
0.29762	136750			0.29762	311251			0.29762	92129.6			0.29762	86789.9
0.30053	141001			0.30053	316417			0.30053	94322.1			0.30053	79545.2
0.30345	147301			0.30345	324447			0.30343	99667.2			0.30343	83964.1
0.30635	151783			0.30637	333362			0.30635	97980.1			0.30635	86044.7
0.30927	150049			0.30927	338026			0.30927	100577			0.30927	90298.1
0.31218	156951			0.31218	338123			0.31218	101976			0.31218	92414.6
0.3151	158584			0.3151	360668			0.31508	103096			0.31508	91807.6
0.318	158010			0.31802	382483			0.318	105548			0.318	95920.3
0.32092	160340			0.32093	406888			0.32092	106335			0.32092	100053
0.32383	164950			0.32383	398529			0.32383	104936			0.32383	97751.2
0.32675	170166			0.32675	417361			0.32673	105577			0.32673	95053.5
0.32965	169256			0.32967	440087			0.32965	104442			0.32965	94077.2
0.33257	169503			0.33258	476199			0.33257	108245			0.33257	98320.5
0.33548	166852			0.3355	455207			0.33548	102967			0.33548	95570.7
0.3384	167121			0.3384	484290			0.33838	109620			0.33838	95184.8
0.34132	172780			0.34132	495355			0.3413	112855			0.3413	97638.6
0.34422	185421			0.34423	532968			0.34422	110708			0.34422	100699
0.34713	180107			0.34715	503987			0.34713	108380			0.34713	100304
0.35005	172598			0.35007	517273			0.35003	106787			0.35003	99710.9
0.35297	173969			0.35297	533450			0.35295	111791			0.35295	100091
0.35587	175050			0.35588	535223			0.35587	111192			0.35587	99266.9
0.35878	180103			0.3588	559566			0.35878	108422			0.35878	95428.8
0.3617	180347			0.36172	603171			0.3617	108341			0.3617	96638.4
0.36462	182768			0.36463	597070			0.3646	110400			0.3646	94962.6
0.36753	176817			0.36753	609593			0.36752	110601			0.36752	96661.9
0.37043	178693			0.37045	609861			0.37043	107596			0.37043	101432
0.37335	184865			0.37337	594111			0.37335	103056			0.37335	103965
0.37627	187341			0.37628	586024			0.37625	104420			0.37625	99417
0.37918	186716			0.3792	596648			0.37917	106646			0.37917	91232.5
0.38208	185469			0.3821	613946			0.38208	108927			0.38208	90983.8
0.385	179156			0.38502	566306			0.385	108222			0.385	91748.7
0.38792	176908			0.38793	604197			0.3879	108950			0.3879	92602
0.39083	171842			0.39085	604372			0.39082	108328			0.39082	96706
0.39375	174232			0.39377	591135			0.39373	109417			0.39373	97318.9
0.39665	176553			0.39667	573848			0.39665	109865			0.39665	93345.7
0.39957	174558			0.39958	584752			0.39955	111127			0.39955	95373.4
0.40248	172731			0.4025	563262			0.40247	107077			0.40247	94413.3
0.4054	171418			0.40542	568217			0.40538	112768			0.40538	94737.5
0.4083	170732			0.40833	552092			0.4083	113891			0.4083	94125.7
0.41122	166484			0.41125	542716			0.4112	105539			0.4112	101443
0.41413	177183			0.41415	542542			0.41412	109874			0.41412	99550
0.41705	172897			0.41707	560046			0.41703	104497			0.41703	96542.1
0.41995	170210			0.41998	528339			0.41995	106412			0.41995	94244.9
0.42287	162266			0.4229	529680			0.42287	96912.7			0.42287	89982.5
0.42578	159152			0.42582	529399			0.42577	103594			0.42577	94404.2
0.4287	160224			0.42872	532077			0.42868	108257			0.42868	97543.6
0.43162	168242			0.43163	530559			0.4316	105283			0.4316	92959.4
0.43452	164492			0.43455	532850			0.43452	100389			0.43452	86593.1
0.43743	159794			0.43747	522342			0.43742	100362			0.43742	89274.7
0.44035	160251			0.44038	505800			0.44033	99926.3			0.44033	90573.1
0.44327	160887			0.44328	488333			0.44325	98738.5			0.44325	93436.6
0.44617	158418			0.4462	488764			0.44617	102469			0.44617	91623.1
0.44908	155100			0.44912	482482			0.44907	99289			0.44907	88730.2
0.452	153126			0.45203	480511			0.45198	97086.1			0.45198	82002.3
0.45492	156805			0.45495	463733			0.4549	93922.3			0.4549	82289.2
0.45782	153780			0.45785	458852			0.45782	95635.1			0.45782	84713.4
0.46073	147532			0.46077	453308			0.46072	100384			0.46072	88798.2
0.46365	146725			0.46368	447421			0.46363	102297			0.46363	84798.8
0.46657	153944			0.4666	444042			0.46655	102185			0.46655	88638.5
0.46948	157580			0.46952	482980			0.46947	100349			0.46947	91770.1
0.47238	156612			0.47242	475139			0.47237	100012			0.47237	94675.9
0.4753	146326			0.47533	436749			0.47528	98980.8			0.47528	92268.5
0.47822	148942			0.47825	428310			0.4782	104838			0.4782	88838.8
0.48113	141612			0.48117	428877			0.48112	97128.2			0.48112	90080.3
0.48403	147075			0.48408	427890			0.48403	98757.4			0.48402	93548.8
0.48695	138145			0.48698	417900			0.48693	101756			0.48693	85382
0.48987	140436			0.4899	428006			0.48985	107961			0.48985	84390.5
0.49278	143454			0.49282	441770			0.49277	103226			0.49277	85243.7
0.4957	144232			0.49573	390497			0.49568	98250.2			0.49567	85855.3
0.4986	138129			0.49865	379512			0.49858	97136.7			0.49858	86086.9
0.50152	134042			0.50155	379289			0.5015	96313.1			0.5015	84748
0.50443	135595			0.50447	390954			0.50442	98363.8			0.50442	83395.3
0.50735	137547			0.50738	386032			0.50733	99249.3			0.50733	85403.9
0.51025	140196			0.5103	404885			0.51023	104298			0.51023	85353.7
0.51317	142684			0.51322	375149			0.51315	101253			0.51315	84182
0.51608	141959			0.51613	410262			0.51607	96019.3			0.51607	82418.2
0.519	133140			0.51903	379253			0.51898	88953.8			0.51898	85931.2
0.5219	137981			0.52195	369197			0.52188	86727.4			0.52188	87491.8
0.52482	139943			0.52487	346669			0.5248	86056.9			0.5248	84515.6
0.52773	135266			0.52778	341878			0.52772	90037			0.52772	88590.1
0.53065	139731			0.5307	340189			0.53063	91030.7			0.53063	94809.9
0.53355	138399			0.5336	322716			0.53353	95982.6			0.53353	86074.3
0.53647	132196			0.53652	327456			0.53645	94914.4			0.53645	84365.2
0.53938	126637			0.53943	362029			0.53937	91040.8			0.53937	84264.1
0.5423	126134			0.54235	342926			0.54228	91289.9			0.54228	85163.9
0.54522	129687			0.54527	338122			0.54518	97547.4			0.54518	84096.9
0.54812	137648			0.54817	326685			0.5481	98560.3			0.5481	84889.1
0.55103	129507			0.55108	329418			0.55102	93055.5			0.55102	84933.9
0.55395	129340			0.554	362789			0.55393	91329			0.55393	85051.9
0.55687	123963			0.55692	335411			0.55683	88177.3			0.55683	85103.4
0.55977	127153			0.55983	321817			0.55975	88288.2			0.55975	90788.6
0.56268	132563			0.56273	332107			0.56267	89637.5			0.56267	90568.1
0.5656	131708			0.56565	326112			0.56558	90910.6			0.56558	85700.9
0.56852	130411			0.56857	320943			0.5685	90131.1			0.56848	83588.4
0.57142	135442			0.57148	314468			0.5714	93002.6			0.5714	84392.6
0.57433	127402			0.5744	326276			0.57432	94511			0.57432	83669.1
0.57725	127143			0.5773	320321			0.57723	92721.9			0.57723	86364
0.58017	127269			0.58022	307837			0.58015	94328.4			0.58015	85673.1
0.58308	125187			0.58313	309051			0.58305	90219.9			0.58305	90545.8
0.58598	126779			0.58605	310529			0.58597	91849.5			0.58597	89161.3
0.5889	131903			0.58897	330811			0.58888	90157.6			0.58888	91236.9
0.59182	129020			0.59187	317186			0.5918	88177.3			0.5918	87304.6
0.59473	122771			0.59478	323771			0.5947	84349.9			0.5947	84113.7
0.59763	122850			0.5977	305392			0.59762	87332.7			0.59762	83889.6
0.60055	125855			0.60062	320547			0.60053	88533.3			0.60053	79649.8
0.60347	128524			0.60353	328715			0.60345	89290			0.60345	82783.5
0.60638	117983			0.60643	336697			0.60635	89066.6			0.60635	87228
0.60928	121170			0.60935	307047			0.60927	89370.8			0.60927	94376
0.6122	123813			0.61227	322116			0.61218	97099.7			0.61218	90970
0.61512	124256			0.61518	319165			0.6151	93548.2			0.6151	86745.4
0.61803	121790			0.6181	316118			0.618	93400			0.618	84992.5
0.62093	121837			0.621	315263			0.62092	88734.8			0.62092	85947.2
0.62385	119342			0.62392	295109			0.62383	91691			0.62383	85731.7
0.62677	122045			0.62683	291365			0.62675	89385.4			0.62675	88872.8
0.62968	124858			0.62975	306475			0.62965	90146.2			0.62965	89612.7
0.6326	120680			0.63267	306010			0.63257	91525.6			0.63257	89775.9
0.6355	121381			0.63557	280894			0.63548	91406.4			0.63548	88903.6
0.63842	119137			0.63848	282707			0.6384	94989.5			0.6384	82402.8
0.64133	119586			0.6414	299670			0.64132	92011.1			0.6413	81104.6
0.64425	117436			0.64432	298711			0.64422	89599.2			0.64422	81375.4
0.64715	122796			0.64723	286731			0.64713	86742.3			0.64713	83085.7
0.65007	125460			0.65013	273368			0.65005	91372.7			0.65005	82243.7
0.65298	121371			0.65305	276330			0.65297	96473.3			0.65295	92775.2
0.6559	121070			0.65597	296018			0.65587	91204.7			0.65587	85590.6
0.6588	124128			0.65888	296813			0.65878	92458.3			0.65878	86092.2
0.66172	119486			0.6618	302623			0.6617	88453.8			0.6617	83244
0.66463	114266			0.6647	291676			0.66462	93686.2			0.6646	82713
0.66755	113032			0.66762	280100			0.66752	94116.8			0.66752	87824.3
0.67045	122433			0.67053	286856			0.67043	94547.6			0.67043	91283.3
0.67337	115074			0.67345	282168			0.67335	88227.8			0.67335	89046
0.67628	109818			0.67637	269142			0.67627	82459.8			0.67627	86841.7
0.6792	116416			0.67927	277370			0.67917	81580.1			0.67917	86456.2
0.6821	117438			0.68218	293569			0.68208	88985.2			0.68208	87824.6
0.68502	115277			0.6851	280215			0.685	97131			0.685	87277.4
0.68793	112095			0.68802	268313			0.68792	94448.1			0.68792	87675.1
0.69085	121064			0.69092	274345			0.69082	90488.4			0.69082	83064.8
0.69377	123512			0.69383	272612			0.69373	88309.7			0.69373	85183.4
0.69667	117865			0.69675	267782			0.69665	84740.8			0.69665	83949.6
0.69958	114899			0.69967	262077			0.69957	87702.2			0.69957	81895.9
0.7025	114901			0.70258	274836			0.70247	84218.1			0.70247	83401.6
0.70542	120932			0.70548	274523			0.70538	89229.2			0.70538	86982.1
0.70832	119997			0.7084	282586			0.7083	88683			0.7083	83448.6
0.71123	118155			0.71132	280191			0.71122	88580.9			0.71122	87600.2
0.71415	120292			0.71423	274491			0.71412	87419.4			0.71412	87882.7
0.71707	115964			0.71715	277612			0.71703	89663.4			0.71703	86945.6
0.71997	119046			0.72005	271569			0.71995	89727.8			0.71995	81752.6
0.72288	120627			0.72297	277964			0.72287	89827.9			0.72287	78663.1
0.7258	114974			0.72588	294524			0.72578	87550.3			0.72577	80541.1
0.72872	111491			0.7288	295746			0.72868	91721.2			0.72868	84315.3
0.73162	117468			0.73172	282094			0.7316	92761.1			0.7316	90134.7
0.73453	116524			0.73462	284453			0.73452	95202.9			0.73452	83561.9
0.73745	114653			0.73753	284774			0.73743	95138.5			0.73742	81164
0.74037	116990			0.74045	278536			0.74033	96334.3			0.74033	76840.8
0.74328	123282			0.74337	275403			0.74325	94691.5			0.74325	80978.7
0.74618	124834			0.74628	282455			0.74617	89722.2			0.74617	81953.8
0.7491	125532			0.74918	256182			0.74908	85956.9			0.74908	76769.6
0.75202	114767			0.7521	263236			0.75198	89214.7			0.75198	75621
0.75493	114981			0.75502	265420			0.7549	90648.5			0.7549	75734.7
0.75783	110475			0.75793	262490			0.75782	91036.3			0.75782	78884.7
0.76075	119383			0.76085	249167			0.76073	91268.8			0.76073	79196.5
0.76367	118955			0.76375	262832			0.76363	88562.1			0.76363	80044.9
0.76658	113880			0.76667	270230			0.76655	85749.7			0.76655	80119.2
0.76948	106767			0.76958	274113			0.76947	85149.8			0.76947	78914.6
0.7724	113778			0.7725	275317			0.77238	86939.3			0.77238	80791.4
0.77532	118105			0.77542	273606			0.77528	89164.2			0.77528	86380.1
0.77823	120850			0.77832	276951			0.7782	90121.5			0.7782	83362
0.78113	117628			0.78123	269284			0.78112	89392.9			0.78112	78450
0.78405	114015			0.78415	261550			0.78403	93987			0.78403	82658.3
0.78697	114505			0.78707	253098			0.78693	92436.2			0.78693	86204.1
0.78988	115810			0.78997	260994			0.78985	87064.4			0.78985	79426.2
0.7928	115539			0.79288	273329			0.79277	86352			0.79277	77066.3
0.7957	124638			0.7958	274156			0.79568	86815.8			0.79568	80947.3
0.79862	121851			0.79872	274940			0.7986	86964.5			0.79858	79187.2
0.80153	120334			0.80163	261988			0.8015	86762.6			0.8015	73075.8
0.80445	116369			0.80455	256634			0.80442	89427.7			0.80442	76599
0.80735	110577			0.80745	253219			0.80733	89161.2			0.80733	78530.7
0.81027	112577			0.81037	253611			0.81025	89457.2			0.81023	84070.7
0.81318	109205			0.81328	258765			0.81315	93966.9			0.81315	83409.5
0.8161	107686			0.8162	274341			0.81607	85285.9			0.81607	85051.7
0.819	107677			0.8191	274660			0.81898	93313.7			0.81898	86712.7
0.82192	109044			0.82202	279123			0.8219	86507.6			0.82188	83456.9
0.82483	118048			0.82493	285771			0.8248	88811.6			0.8248	78635.9
0.82775	118350			0.82785	278930			0.82772	87334.7			0.82772	78027.3
0.83065	120347			0.83077	286915			0.83063	93295.8			0.83063	72163.9
0.83357	112482			0.83367	287999			0.83355	89876.7			0.83353	75510.2
0.83648	107386			0.83658	289511			0.83645	88528			0.83645	78423.7
0.8394	106857			0.8395	266165			0.83937	84429			0.83937	76543.3
0.8423	111633			0.84242	262237			0.84228	83977.5			0.84228	75342.7
0.84522	112234			0.84533	264265			0.8452	85027.5			0.84518	80998.1
0.84813	107901			0.84823	273841			0.8481	92012.8			0.8481	82301.1
0.85105	111956			0.85115	263623			0.85102	83749.8			0.85102	78185.1
0.85397	115659			0.85407	253993			0.85393	84920			0.85393	70788
0.85687	111731			0.85698	255837			0.85685	82319.9			0.85683	75568.9
0.85978	113009			0.8599	262683			0.85975	83493			0.85975	81825.6
0.8627	109972			0.8628	260939			0.86267	82946.6			0.86267	83170.3
0.86562	108908			0.86572	264296			0.86558	88784.4			0.86558	78916
0.86852	108379			0.86863	249193			0.8685	85450.4			0.86848	75954.3
0.87143	110316			0.87155	258721			0.87142	92981.6			0.8714	80412.1
0.87435	113623			0.87447	279614			0.87432	86848.5			0.87432	80365.1
0.87727	107689			0.87737	281034			0.87723	87872.2			0.87723	76850.1
0.88017	107725			0.88028	273890			0.88015	82580.2			0.88013	77420.8
0.88308	108417			0.8832	261931			0.88307	84784.8			0.88305	81203.2
0.886	114361			0.88612	262089			0.88597	86114.5			0.88597	90598.1
0.88892	111032			0.88903	266377			0.88888	83830.8			0.88888	93198.3
0.89182	111211			0.89193	259608			0.8918	81833.2			0.8918	88153.2
0.89473	110677			0.89485	268983			0.89472	82584.6			0.8947	84395.4
0.89765	106942			0.89777	283195			0.89762	87122.2			0.89762	80824.3
0.90057	110054			0.90068	271749			0.90053	83879.8			0.90053	82263.1
0.90347	109803			0.9036	265390			0.90345	87633.8			0.90345	82782.2
0.90638	109996			0.9065	251644			0.90637	88354.6			0.90635	86081.6
0.9093	103709			0.90942	265587			0.90927	91880			0.90927	79993.7
0.91222	103738			0.91233	261712			0.91218	88282.6			0.91218	76717.9
0.91512	103346			0.91525	253544			0.9151	90851.7			0.9151	77910.4
0.91803	108209			0.91815	261199			0.91802	87436.8			0.918	78414.6
0.92095	106132			0.92107	256149			0.92092	81461.2			0.92092	84972.7
0.92387	109398			0.92398	262351			0.92383	82142.3			0.92383	86908.2
0.92678	112499			0.9269	265302			0.92675	88197.5			0.92675	87780.9
0.92968	113274			0.92982	269878			0.92967	90920.5			0.92965	85179.8
0.9326	111386			0.93272	271356			0.93257	90436.5			0.93257	91186.4
0.93552	112914			0.93563	267618			0.93548	91374.8			0.93548	80346.2
0.93843	109237			0.93855	265356			0.9384	86417.5			0.9384	80822.6
0.94133	113063			0.94147	260528			0.94132	85375.3			0.9413	80837.2
0.94425	112153			0.94438	266361			0.94422	83929.7			0.94422	82473.4
0.94717	109350			0.94728	273104			0.94713	87845			0.94713	83515
0.95008	109845			0.9502	265360			0.95005	90642.3			0.95005	87425.1
0.95298	111664			0.95312	250899			0.95297	90442.8			0.95295	85634.9
0.9559	105017			0.95603	263567			0.95588	88159.6			0.95587	83276.2
0.95882	108252			0.95895	256985			0.95878	90067.6			0.95878	83111.5
0.96173	102806			0.96185	248732			0.9617	80452.4			0.9617	84996.6
0.96463	104158			0.96477	260860			0.96462	81360.1			0.9646	78859
0.96755	108668			0.96768	254360			0.96753	80764.7			0.96752	77887.9
0.97047	111931			0.9706	243014			0.97043	85178.6			0.97043	82194.4
0.97338	109483			0.97352	248401			0.97335	86267.1			0.97335	83539.9
0.97628	108056			0.97642	265841			0.97627	85906.9			0.97627	80224.2
0.9792	108855			0.97933	270692			0.97918	84576.3			0.97917	77563
0.98212	109331			0.98225	249428			0.98208	83507			0.98208	82295
0.98503	108420			0.98517	250027			0.985	82116.8			0.985	79578.6
0.98793	106154			0.98808	254283			0.98792	91858.2			0.98792	85086.4
0.99085	102469			0.99098	261274			0.99083	93095.8			0.99082	82290.5
0.99377	109903			0.9939	257413			0.99373	91162.4			0.99373	77139.5
0.99668	109386			0.99682	250019			0.99665	84851.9			0.99665	79537.1
0.9996	108237			0.99973	260958			0.99957	81135.4			0.99957	84271.2
1.0025	105260			1.00265	271550			1.00248	81735.7			1.00247	84249.5
1.00542	104073			1.00555	268196			1.00538	83258.2			1.00538	81002.4
1.00833	107255			1.00847	252203			1.0083	87081.5			1.0083	79672
1.01125	108231			1.01138	257809			1.01122	84420.6			1.01122	80251.1
1.01415	110687			1.0143	246878			1.01413	83364.5			1.01412	80819.9
1.01707	111328			1.0172	248700			1.01703	86767.2			1.01703	79522.3
1.01998	103470			1.02012	251270			1.01995	91531.4			1.01995	81269.2
1.0229	100874			1.02303	266486			1.02287	89285.6			1.02287	79668.4
1.0258	98600.9			1.02595	259842			1.02578	91357.3			1.02577	78798.9
1.02872	105913			1.02887	251825			1.02868	92568			1.02868	81457.5
1.03163	106377			1.03177	255998			1.0316	91194.9			1.0316	86674
1.03455	107644			1.03468	258411			1.03452	84914.5			1.03452	85639.8
1.03745	112749			1.0376	257359			1.03743	85017.4			1.03742	81870.9
1.04037	113849			1.04052	264857			1.04033	85366.8			1.04033	79726
1.04328	109063			1.04343	261294			1.04325	86325.3			1.04325	80683.1
1.0462	112823			1.04633	262138			1.04617	87792.8			1.04617	78803.6
1.0491	109802			1.04925	249393			1.04908	86147.1			1.04907	77294.1
1.05202	103348			1.05217	249646			1.052	86572.6			1.05198	80716
1.05493	106122			1.05508	258434			1.0549	86294.3			1.0549	82469.9
1.05785	105941			1.058	249314			1.05782	85942.5			1.05782	85405.6
1.06075	113657			1.0609	258280			1.06073	84880.7			1.06072	86243.2
1.06367	111665			1.06382	243750			1.06365	83236.3			1.06363	81034.2
1.06658	109860			1.06673	249171			1.06655	83750.8			1.06655	79298.4
1.0695	110455			1.06965	254618			1.06947	86965.5			1.06947	83752.6
1.07242	106895			1.07257	256908			1.07238	81893.9			1.07238	82359.5
1.07532	101389			1.07547	258001			1.0753	88527.5			1.07528	79837.4
1.07823	108916			1.07838	252407			1.0782	86041.9			1.0782	81386.8
1.08115	104054			1.0813	254288			1.08112	84495.4			1.08112	85202.6
1.08407	100267			1.08422	261805			1.08403	83594.7			1.08403	84806.8
1.08697	94905.9			1.08713	259010			1.08695	87615			1.08693	84112.3
1.08988	99877.6			1.09003	259594			1.08985	86607.5			1.08985	89455
1.0928	104917			1.09295	266307			1.09277	84239.8			1.09277	91326.1
1.09572	106077			1.09587	258607			1.09568	82586.2			1.09568	85214.4
1.09862	111564			1.09878	257063			1.0986	85088			1.09858	86099.7
1.10153	111787			1.1017	250350			1.1015	84958.9			1.1015	85867.2
1.10445	107726			1.1046	242073			1.10442	77682.2			1.10442	85953.2
1.10737	101980			1.10752	238372			1.10733	77623.8			1.10733	77976.3
1.11027	98151.9			1.11043	245827			1.11025	83908.8			1.11023	75153.3
1.11318	97914.6			1.11335	256021			1.11315	82764.5			1.11315	77591.3
1.1161	100477			1.11627	270136			1.11607	83609.4			1.11607	83576.4
1.11902	113465			1.11917	270606			1.11898	96823.1			1.11898	90235.8
1.12192	127245			1.12208	295694			1.1219	123736			1.12188	104360
1.12483	160524			1.125	378329			1.1248	163890			1.1248	125807
1.12775	205232			1.12792	476333			1.12772	222598			1.12772	159747
1.13067	261002			1.13083	560272			1.13063	280387			1.13063	199962
1.13357	312083			1.13373	649365			1.13355	320026			1.13353	248273
1.13648	332238			1.13665	723506			1.13645	333769			1.13645	271176
1.1394	334744			1.13957	712659			1.13937	323168			1.13937	264245
1.14232	305391			1.14248	637904			1.14228	287373			1.14228	248390
1.14523	260874			1.14538	557198			1.1452	251665			1.14518	200984
1.14813	222250			1.1483	487676			1.1481	206182			1.1481	158792
1.15105	193061			1.15122	449080			1.15102	181130			1.15102	139924
1.15397	175779			1.15413	408304			1.15393	165599			1.15393	134869
1.15688	185481			1.15705	417151			1.15685	166848			1.15683	143869
1.15978	184649			1.15995	424065			1.15975	174399			1.15975	145333
1.1627	190324			1.16287	464953			1.16267	181094			1.16267	145627
1.16562	190716			1.16578	494622			1.16558	185424			1.16558	145030
1.16853	210322			1.1687	528720			1.1685	195361			1.16848	148242
1.17143	229924			1.17162	547183			1.1714	204388			1.1714	152867
1.17435	239607			1.17452	560122			1.17432	217657			1.17432	163868
1.17727	260265			1.17743	566052			1.17723	227991			1.17723	178762
1.18018	279047			1.18035	574605			1.18015	239607			1.18013	199432
1.18308	284134			1.18327	589455			1.18307	244136			1.18305	203881
1.186	293052			1.18618	572555			1.18597	242679			1.18597	210138
1.18892	305131			1.18908	578147			1.18888	240634			1.18888	211036
1.19183	315610			1.192	572346			1.1918	257941			1.19178	218690
1.19475	306413			1.19492	581627			1.19472	257542			1.1947	213538
1.19765	307347			1.19783	598348			1.19762	259927			1.19762	213700
1.20057	312238			1.20075	582845			1.20053	254976			1.20053	205235
1.20348	321995			1.20365	584498			1.20345	256447			1.20345	196088
1.2064	316134			1.20657	587039			1.20637	249131			1.20635	214111
1.2093	304004			1.20948	571777			1.20927	241453			1.20927	214885
1.21222	291316			1.2124	542191			1.21218	252512			1.21218	214967
1.21513	286578			1.21532	518602			1.2151	245949			1.2151	222025
1.21805	278985			1.21822	545989			1.21802	243974			1.218	236731
1.22097	280792			1.22113	540491			1.22093	239013			1.22092	260135
1.22387	279889			1.22405	558540			1.22383	244696			1.22383	279477
1.22678	279233			1.22697	572057			1.22675	236149			1.22675	301229
1.2297	267427			1.22988	586937			1.22967	239348			1.22967	319287
1.23262	267766			1.23278	563644			1.23258	233958			1.23257	321698
1.23552	269830			1.2357	544131			1.23548	237823			1.23548	303940
1.23843	266667			1.23862	561602			1.2384	244481			1.2384	280755
1.24135	278166			1.24153	554559			1.24132	262294			1.24132	271550
1.24427	304174			1.24445	587065			1.24423	319921			1.24422	287212
1.24718	371197			1.24735	664422			1.24713	496857			1.24713	381168
1.25008	506779			1.25027	891740			1.25005	827263			1.25005	631406
1.253	713226			1.25318	1311000			1.25297	1288833			1.25297	1037945
1.25592	915611			1.2561	1845395			1.25588	1700732			1.25587	1502254
1.25883	1079487			1.25902	2306788			1.2588	1977594			1.25878	1872322
1.26173	1155606			1.26192	2564430			1.2617	2043389			1.2617	2072987
1.26465	1140304			1.26483	2570547			1.26462	2007157			1.26462	2073453
1.26757	1079134			1.26775	2427571			1.26753	1857114			1.26753	1920967
1.27048	995486			1.27067	2199284			1.27045	1676520			1.27043	1713767
1.27338	918676			1.27358	1978849			1.27335	1488429			1.27335	1512667
1.2763	834402			1.27648	1767891			1.27627	1324150			1.27627	1347132
1.27922	776432			1.2794	1614881			1.27918	1191122			1.27918	1198411
1.28213	701552			1.28232	1450398			1.2821	1070195			1.28208	1068119
1.28505	653432			1.28523	1343784			1.285	961529			1.285	973573
1.28795	607844			1.28815	1261068			1.28792	881061			1.28792	891965
1.29087	565535			1.29105	1194810			1.29083	809078			1.29083	815822
1.29378	537602			1.29397	1140876			1.29375	761246			1.29373	745767
1.2967	502272			1.29688	1073179			1.29667	707749			1.29665	698253
1.2996	489810			1.2998	1012303			1.29957	668352			1.29957	662287
1.30252	474515			1.30272	979440			1.30248	634700			1.30248	634244
1.30543	503100			1.30562	978607			1.3054	659172			1.3054	603564
1.30835	562768			1.30853	992136			1.30832	731157			1.3083	572858
1.31127	672753			1.31145	1083243			1.31122	847923			1.31122	570050
1.31417	781904			1.31437	1227042			1.31413	967927			1.31413	593273
1.31708	853857			1.31728	1374973			1.31705	1051317			1.31705	621004
1.32	877554			1.32018	1473645			1.31997	1055727			1.31995	639214
1.32292	859689			1.3231	1502559			1.32288	1020342			1.32287	630738
1.32582	824646			1.32602	1491626			1.32578	944079			1.32578	625326
1.32873	754492			1.32893	1441839			1.3287	868499			1.3287	609504
1.33165	680417			1.33185	1382764			1.33162	791700			1.3316	613672
1.33457	627322			1.33475	1307075			1.33453	726997			1.33452	593750
1.33748	578551			1.33767	1219260			1.33743	665724			1.33743	565810
1.34038	543380			1.34058	1133345			1.34035	628777			1.34035	516751
1.3433	520176			1.3435	1092117			1.34327	597147			1.34327	513112
1.34622	513068			1.34642	1059947			1.34618	580013			1.34617	485161
1.34913	496910			1.34933	1018955			1.34908	553011			1.34908	471037
1.35203	484672			1.35223	1007087			1.352	522808			1.352	452729
1.35495	466823			1.35515	993596			1.35492	498149			1.35492	429869
1.35787	457642			1.35807	963802			1.35783	478075			1.35782	419089
1.36078	429970			1.36098	925772			1.36075	469302			1.36073	398784
1.3637	401794			1.36388	870845			1.36365	448345			1.36365	390651
1.3666	393195			1.3668	826499			1.36657	431350			1.36657	385981
1.36952	400432			1.36972	823499			1.36948	422252			1.36947	374008
1.37243	386998			1.37263	796733			1.3724	413172			1.37238	358485
1.37535	369902			1.37555	783734			1.3753	405801			1.3753	340466
1.37825	371458			1.37845	744606			1.37822	392753			1.37822	327418
1.38117	361811			1.38137	772730			1.38113	378535			1.38113	313510
1.38408	362547			1.38428	705567			1.38405	370499			1.38403	309055
1.387	352648			1.3872	739110			1.38695	371096			1.38695	293562
1.3899	337172			1.39012	725877			1.38987	360994			1.38987	287344
1.39282	331894			1.39302	710182			1.39278	363573			1.39278	280492
1.39573	335224			1.39593	704195			1.3957	347879			1.39568	277002
1.39865	340801			1.39885	690393			1.3986	339064			1.3986	274384
1.40157	335972			1.40177	678288			1.40152	346153			1.40152	271796
1.40447	334240			1.40468	665528			1.40443	349659			1.40443	275993
1.40738	333561			1.40758	660640			1.40735	347476			1.40733	274537
1.4103	332810			1.4105	679086			1.41025	337349			1.41025	271618
1.41322	334424			1.41342	713331			1.41317	338515			1.41317	291749
1.41612	336327			1.41633	737073			1.41608	336817			1.41608	298950
1.41903	327115			1.41925	795649			1.419	338460			1.419	317096
1.42195	334710			1.42215	774873			1.42192	334154			1.4219	322527
1.42487	322019			1.42507	767678			1.42482	329687			1.42482	316294
1.42778	324686			1.42798	768932			1.42773	318408			1.42773	305589
1.43068	327637			1.4309	761989			1.43065	307014			1.43065	295446
1.4336	323871			1.43382	753410			1.43357	309241			1.43355	270332
1.43652	307863			1.43672	701929			1.43647	301070			1.43647	254180
1.43943	317914			1.43963	707929			1.43938	310073			1.43938	246163
1.44233	314998			1.44255	668763			1.4423	306188			1.4423	244370
1.44525	318348			1.44547	651336			1.44522	309725			1.4452	244969
1.44817	317943			1.44838	665516			1.44812	312475			1.44812	232297
1.45108	319582			1.45128	646094			1.45103	309746			1.45103	231430
1.45398	311601			1.4542	656874			1.45395	297082			1.45395	225575
1.4569	305343			1.45712	621236			1.45687	287348			1.45687	222403
1.45982	308256			1.46003	606849			1.45977	298489			1.45977	207340
1.46273	304083			1.46295	595123			1.46268	294332			1.46268	193105
1.46565	308930			1.46585	617514			1.4656	296431			1.4656	183936
1.46855	303697			1.46877	577632			1.46852	296857			1.46852	186084
1.47147	299142			1.47168	575213			1.47143	299755			1.47142	180277
1.47438	294052			1.4746	563590			1.47433	301015			1.47433	181442
1.4773	292801			1.47752	564998			1.47725	299570			1.47725	173131
1.4802	299325			1.48042	575063			1.48017	295906			1.48017	168400
1.48312	303493			1.48333	583785			1.48308	302222			1.48307	160699
1.48603	308606			1.48625	588419			1.48598	307206			1.48598	157990
1.48895	329595			1.48917	581290			1.4889	301640			1.4889	152512
1.49187	352584			1.49208	584171			1.49182	297334			1.49182	156049
1.49477	359165			1.49498	628503			1.49473	290366			1.49472	158803
1.49768	363557			1.4979	616149			1.49763	297964			1.49763	158961
1.5006	366362			1.50082	623864			1.50055	301098			1.50055	157690
1.50352	372755			1.50373	620824			1.50347	314188			1.50347	149346
1.50642	353186			1.50665	622465			1.50638	308632			1.50637	149952
1.50933	359810			1.50955	623836			1.50928	304903			1.50928	154646
1.51225	349573			1.51247	605072			1.5122	302450			1.5122	160219
1.51517	345209			1.51538	635099			1.51512	310683			1.51512	165066
1.51807	334329			1.5183	621830			1.51803	314543			1.51803	160232
1.52098	337097			1.52122	628664			1.52093	308798			1.52093	169165
1.5239	333649			1.52412	636459			1.52385	297542			1.52385	169322
1.52682	331400			1.52703	626686			1.52677	298027			1.52677	164176
1.52973	326470			1.52995	624604			1.52968	294178			1.52968	157256
1.53263	322821			1.53287	631277			1.5326	295795			1.53258	155951
1.53555	316067			1.53578	629166			1.5355	291993			1.5355	157695
1.53847	307557			1.53868	708927			1.53842	294757			1.53842	153690
1.54138	308354			1.5416	605302			1.54133	288085			1.54133	146570
1.54428	304150			1.54452	582853			1.54425	290895			1.54423	146038
1.5472	289146			1.54743	581892			1.54715	295348			1.54715	145346
1.55012	303475			1.55035	603608			1.55007	286498			1.55007	141431
1.55303	305254			1.55325	607118			1.55298	281113			1.55298	137093
1.55595	307304			1.55617	583004			1.5559	279347			1.55588	135962
1.55885	300818			1.55908	567849			1.5588	274488			1.5588	133830
1.56177	294336			1.562	551104			1.56172	277174			1.56172	135779
1.56468	288714			1.56492	548430			1.56463	279203			1.56463	138552
1.5676	292640			1.56782	564005			1.56755	276617			1.56753	133094
1.5705	295360			1.57073	555513			1.57045	275049			1.57045	129742
1.57342	300240			1.57365	533374			1.57337	278415			1.57337	135660
1.57633	307176			1.57657	559233			1.57628	282578			1.57628	138486
1.57925	315688			1.57948	578925			1.5792	281390			1.5792	136229
1.58215	333075			1.58238	572737			1.5821	283031			1.5821	136917
1.58507	344631			1.5853	554875			1.58502	287250			1.58502	133471
1.58798	354551			1.58822	569214			1.58793	298430			1.58793	129053
1.5909	375393			1.59113	563688			1.59085	297912			1.59085	129610
1.59382	390700			1.59405	579813			1.59377	312253			1.59375	133159
1.59672	397807			1.59695	577517			1.59667	315015			1.59667	141802
1.59963	400296			1.59987	585709			1.59958	322817			1.59958	142300
1.60255	403692			1.60278	582248			1.6025	334808			1.6025	137721
1.60547	413114			1.6057	611747			1.60542	335996			1.6054	142442
1.60837	419871			1.60862	639168			1.60832	337889			1.60832	147071
1.61128	417101			1.61152	661401			1.61123	334285			1.61123	151068
1.6142	406664			1.61443	682551			1.61415	327251			1.61415	145776
1.61712	390313			1.61735	696552			1.61707	321065			1.61705	141161
1.62003	392689			1.62027	702471			1.61997	315855			1.61997	129904
1.62293	396856			1.62318	666498			1.62288	321050			1.62288	128912
1.62585	396290			1.62608	657582			1.6258	320282			1.6258	126367
1.62877	383813			1.629	642477			1.62872	321438			1.6287	132588
1.63168	384675			1.63192	639640			1.63162	314117			1.63162	132870
1.63458	401328			1.63483	633062			1.63453	327299			1.63453	146284
1.6375	422537			1.63775	659899			1.63745	345350			1.63745	162847
1.64042	460570			1.64065	702103			1.64037	384364			1.64037	200179
1.64333	503529			1.64357	772513			1.64327	405357			1.64327	232768
1.64625	518259			1.64648	851266			1.64618	425823			1.64618	270133
1.64915	510485			1.6494	913743			1.6491	419465			1.6491	272368
1.65207	494373			1.65232	965675			1.65202	409552			1.65202	261304
1.65498	475985			1.65522	946061			1.65493	376660			1.65492	238696
1.6579	450897			1.65813	899906			1.65783	361578			1.65783	225712
1.6608	428012			1.66105	840451			1.66075	352912			1.66075	222190
1.66372	406210			1.66397	797305			1.66367	347582			1.66367	216558
1.66663	393796			1.66687	770638			1.66658	339532			1.66657	205527
1.66955	385050			1.66978	746360			1.66948	334688			1.66948	193647
1.67245	378220			1.6727	731849			1.6724	330822			1.6724	191932
1.67537	372034			1.67562	721613			1.67532	330275			1.67532	188779
1.67828	367197			1.67853	704582			1.67823	317585			1.67822	174499
1.6812	362232			1.68143	689149			1.68113	315587			1.68113	171636
1.68412	353293			1.68435	678527			1.68405	312317			1.68405	158235
1.68702	344287			1.68727	663568			1.68697	311824			1.68697	158934
1.68993	343113			1.69018	665961			1.68988	303956			1.68987	156812
1.69285	347710			1.6931	647453			1.69278	294560			1.69278	160760
1.69577	354725			1.696	642365			1.6957	293418			1.6957	158616
1.69867	338777			1.69892	617401			1.69862	299573			1.69862	165796
1.70158	341869			1.70183	622880			1.70153	298575			1.70152	152475
1.7045	341643			1.70475	628342			1.70445	295615			1.70443	148675
1.70742	341157			1.70767	612729			1.70735	301382			1.70735	152327
1.71033	330479			1.71057	612162			1.71027	293669			1.71027	149319
1.71323	323687			1.71348	600666			1.71318	296120			1.71318	147828
1.71615	317032			1.7164	606630			1.7161	291271			1.71608	151232
1.71907	308230			1.71932	611318			1.719	290264			1.719	145270
1.72198	313209			1.72223	615023			1.72192	289198			1.72192	140114
1.72488	315633			1.72513	602994			1.72483	291239			1.72483	137760
1.7278	336937			1.72805	605684			1.72775	305610			1.72773	142478
1.73072	330797			1.73097	625930			1.73065	321294			1.73065	144092
1.73363	335827			1.73388	614175			1.73357	340294			1.73357	136402
1.73653	346736			1.7368	624062			1.73648	360342			1.73648	144043
1.73945	360962			1.7397	609408			1.7394	383405			1.73938	158322
1.74237	374652			1.74262	626214			1.7423	404997			1.7423	197070
1.74528	389186			1.74553	661456			1.74522	435465			1.74522	259119
1.7482	410693			1.74845	663625			1.74813	480060			1.74813	365038
1.7511	450044			1.75137	703469			1.75105	536190			1.75103	531603
1.75402	483873			1.75427	704265			1.75395	620170			1.75395	763172
1.75693	514186			1.75718	742168			1.75687	668006			1.75687	986919
1.75985	538737			1.7601	755693			1.75978	685483			1.75978	1149219
1.76275	524859			1.76302	799175			1.7627	662859			1.76268	1216850
1.76567	514021			1.76593	774364			1.76562	618624			1.7656	1167875
1.76858	492337			1.76883	744351			1.76852	578044			1.76852	1077351
1.7715	473604			1.77175	733018			1.77143	557153			1.77143	993128
1.7744	451604			1.77467	706244			1.77435	526920			1.77435	908338
1.77732	432568			1.77758	699439			1.77727	509179			1.77725	833800
1.78023	414566			1.7805	665431			1.78017	481149			1.78017	747120
1.78315	398228			1.7834	642192			1.78308	460206			1.78308	688413
1.78607	391221			1.78632	619491			1.786	455356			1.786	664012
1.78897	386201			1.78923	622365			1.78892	425098			1.7889	629630
1.79188	380238			1.79215	645674			1.79182	416628			1.79182	591455
1.7948	373413			1.79507	894800			1.79473	401736			1.79473	542233
1.79772	358814			1.79797	2883692			1.79765	404574			1.79765	513331
1.80062	352110			1.80088	7426112			1.80057	393474			1.80055	476688
1.80353	347630			1.8038	13600000			1.80347	374612			1.80347	454096
1.80645	344693			1.80672	18700000			1.80638	382265			1.80638	457455
1.80937	343906			1.80963	21500000			1.8093	394991			1.8093	439611
1.81227	348868			1.81253	22200000			1.81222	393571			1.8122	420150
1.81518	342538			1.81545	21000000			1.81512	428366			1.81512	419125
1.8181	348661			1.81837	19200000			1.81803	389783			1.81803	408764
1.82102	336192			1.82128	17100000			1.82095	395850			1.82095	399945
1.82393	327056			1.8242	15300000			1.82387	393461			1.82385	383240
1.82683	325093			1.8271	13800000			1.82677	371272			1.82677	370554
1.82975	320130			1.83002	12500000			1.82968	369506			1.82968	380302
1.83267	320349			1.83293	11500000			1.8326	366982			1.8326	363161
1.83558	321254			1.83585	10600000			1.83552	367270			1.8355	341569
1.83848	317720			1.83875	9840664			1.83843	356390			1.83842	327970
1.8414	311618			1.84167	9182809			1.84133	349007			1.84133	322147
1.84432	309893			1.84458	8671471			1.84425	343566			1.84425	320794
1.84723	313995			1.8475	8231838			1.84717	333756			1.84717	304318
1.85013	316568			1.85042	7819302			1.85008	337236			1.85007	303515
1.85305	310739			1.85332	7458761			1.85298	340353			1.85298	294008
1.85597	319961			1.85623	7089928			1.8559	334799			1.8559	288660
1.85888	318577			1.85915	6821356			1.85882	326155			1.85882	278749
1.8618	316782			1.86207	6426589			1.86173	331660			1.86172	284973
1.8647	312250			1.86498	6219195			1.86463	327478			1.86463	277644
1.86762	307735			1.86788	5947006			1.86755	333287			1.86755	264942
1.87053	312261			1.8708	5793164			1.87047	324931			1.87047	249278
1.87345	303397			1.87372	5612585			1.87338	335671			1.87337	253456
1.87635	305533			1.87663	5377248			1.87628	330382			1.87628	248886
1.87927	316990			1.87955	5128225			1.8792	335001			1.8792	250084
1.88218	307290			1.88245	4990903			1.88212	328551			1.88212	244166
1.8851	302785			1.88537	4922932			1.88503	320282			1.88502	235419
1.888	291638			1.88828	4807526			1.88793	312672			1.88793	217963
1.89092	289158			1.8912	4599839			1.89085	315747			1.89085	216196
1.89383	300011			1.89412	4491373			1.89377	305011			1.89377	222945
1.89675	306666			1.89702	4350664			1.89668	307803			1.89667	228218
1.89967	294626			1.89993	4236952			1.8996	308869			1.89958	219307
1.90257	298513			1.90285	4153799			1.9025	310066			1.9025	204847
1.90548	288660			1.90577	4059899			1.90542	302571			1.90542	206618
1.9084	299406			1.90868	4007887			1.90833	293988			1.90833	205571
1.91132	295850			1.91158	3828194			1.91125	301177			1.91123	209664
1.91422	290877			1.9145	3734781			1.91415	300151			1.91415	197078
1.91713	283304			1.91742	3669592			1.91707	291979			1.91707	191383
1.92005	288100			1.92033	3599474			1.91998	289538			1.91998	194159
1.92297	284044			1.92325	3508419			1.9229	287688			1.92288	193672
1.92588	286168			1.92615	3455203			1.9258	283132			1.9258	190973
1.92878	284964			1.92907	3398834			1.92872	283379			1.92872	186280
1.9317	287022			1.93198	3340801			1.93163	287701			1.93163	185571
1.93462	286731			1.9349	3289918			1.93455	304264			1.93453	179819
1.93753	291771			1.93782	3269438			1.93745	286143			1.93745	174019
1.94043	289894			1.94072	3190584			1.94037	282907			1.94037	176815
1.94335	291027			1.94363	3101909			1.94328	277947			1.94328	162704
1.94627	283636			1.94655	3071698			1.9462	274770			1.94618	167610
1.94918	282736			1.94947	3042430			1.9491	282144			1.9491	163170
1.95208	287539			1.95238	2997748			1.95202	280742			1.95202	163921
1.955	273160			1.95528	2899653			1.95493	290336			1.95493	150710
1.95792	277160			1.9582	2814749			1.95785	270966			1.95783	147178
1.96083	278180			1.96112	2747234			1.96077	268954			1.96075	130444
1.96373	272832			1.96403	2697573			1.96367	267706			1.96367	124511
1.96665	281526			1.96695	2661557			1.96658	274288			1.96658	123192
1.96957	281048			1.96985	2634504			1.9695	270862			1.96948	122289
1.97248	280950			1.97277	2579519			1.97242	268882			1.9724	128987
1.9754	274889			1.97568	2598394			1.97532	269847			1.97532	116705
1.9783	295372			1.9786	2574380			1.97823	271232			1.97823	112299
1.98122	409529			1.9815	2528427			1.98115	270434			1.98115	118280
1.98413	784494			1.98442	2434188			1.98407	295144			1.98405	118540
1.98705	1536561			1.98733	2417642			1.98697	295621			1.98697	117627
1.98995	2484486			1.99025	2371318			1.98988	321231			1.98988	123567
1.99287	3309167			1.99317	2351010			1.9928	360698			1.9928	115331
1.99578	3739964			1.99607	2318603			1.99572	400617			1.9957	112685
1.9987	3815944			1.99898	2273492			1.99862	431445			1.99862	112857
2.0016	3630581			2.0019	2241683			2.00153	431890			2.00153	113842
2.00452	3338586			2.00482	2204987			2.00445	431488			2.00445	115580
2.00743	3046986			2.00773	2189902			2.00737	417737			2.00735	112375
2.01035	2789464			2.01063	2189809			2.01027	406483			2.01027	115124
2.01327	2565921			2.01355	2158142			2.01318	397393			2.01318	117103
2.01617	2359661			2.01647	2161847			2.0161	376217			2.0161	114317
2.01908	2183396			2.01938	2131437			2.01902	356491			2.019	116298
2.022	2012486			2.0223	2113276			2.02193	339726			2.02192	115637
2.02492	1889788			2.0252	2080757			2.02483	340349			2.02483	115357
2.02782	1780868			2.02812	2078524			2.02775	331789			2.02775	111830
2.03073	1682232			2.03103	2040525			2.03067	328856			2.03065	110822
2.03365	1588732			2.03395	2015712			2.03358	313473			2.03357	116003
2.03657	1513225			2.03687	2006496			2.03648	316232			2.03648	113763
2.03948	1441172			2.03977	1922906			2.0394	327302			2.0394	112292
2.04238	1377474			2.04268	1901331			2.04232	327607			2.0423	114084
2.0453	1346917			2.0456	1895746			2.04523	323695			2.04522	121934
2.04822	1274398			2.04852	1907612			2.04813	302464			2.04813	211715
2.05113	1228673			2.05143	1868745			2.05105	306600			2.05105	960226
2.05403	1199469			2.05435	1861198			2.05397	325863			2.05397	2731706
2.05695	1176635			2.05725	1937189			2.05688	359550			2.05687	5058833
2.05987	1146993			2.06017	2201384			2.05978	424632			2.05978	6795115
2.06278	1113760			2.06308	2820786			2.0627	504614			2.0627	7428213
2.0657	1096867			2.066	3653670			2.06562	602498			2.06562	7359946
2.0686	1076352			2.0689	4446871			2.06853	666833			2.06852	7038325
2.07152	1044651			2.07182	4851017			2.07143	719776			2.07143	6561558
2.07443	1018273			2.07473	4963976			2.07435	734454			2.07435	5934444
2.07735	1014898			2.07765	4821969			2.07727	752192			2.07727	5481682
2.08025	967577			2.08057	4538831			2.08018	762252			2.08017	5034962
2.08317	951913			2.08347	4263337			2.08308	777693			2.08308	4642442
2.08608	920025			2.08638	3984499			2.086	767678			2.086	4309082
2.089	890902			2.0893	3745287			2.08892	752664			2.08892	4014221
2.0919	871988			2.09222	3553456			2.09183	755540			2.09182	3731566
2.09482	847778			2.09513	3404101			2.09475	760464			2.09473	3487790
2.09773	838867			2.09803	3227012			2.09765	755970			2.09765	3339807
2.10065	833374			2.10095	3107007			2.10057	733008			2.10057	3191646
2.10357	795182			2.10387	2986322			2.10348	721132			2.10348	3043009
2.10647	787299			2.10678	2892498			2.1064	716243			2.10638	2849111
2.10938	759521			2.1097	2807410			2.1093	705346			2.1093	2721573
2.1123	741331			2.1126	2699769			2.11222	699631			2.11222	2616734
2.11522	716103			2.11552	2581885			2.11513	683942			2.11513	2522881
2.11812	688143			2.11843	2518606			2.11805	653673			2.11803	2424868
2.12103	672923			2.12135	2477514			2.12095	639221			2.12095	2343319
2.12395	667799			2.12427	2402221			2.12387	640563			2.12387	2237691
2.12687	647931			2.12717	2325231			2.12678	628647			2.12678	2161929
2.12978	639543			2.13008	2274211			2.1297	628894			2.12968	2102579
2.13268	622468			2.133	2212799			2.1326	623974			2.1326	2039746
2.1356	621354			2.13592	2156381			2.13552	617705			2.13552	1954290
2.13852	613151			2.13883	2109029			2.13843	605198			2.13843	1873282
2.14143	597956			2.14173	2065394			2.14135	598656			2.14133	1856874
2.14433	582136			2.14465	2054476			2.14427	599526			2.14425	1795102
2.14725	568969			2.14757	2007703			2.14717	587682			2.14717	1784245
2.15017	564420			2.15048	1965026			2.15008	582926			2.15008	1713154
2.15308	564116			2.15338	1926111			2.153	572781			2.153	1663274
2.15598	542589			2.1563	1931031			2.15592	556546			2.1559	1606854
2.1589	537247			2.15922	1868020			2.15882	548251			2.15882	1596379
2.16182	534612			2.16213	1863849			2.16173	542019			2.16173	1553423
2.16473	527504			2.16505	1839938			2.16465	534572			2.16465	1527621
2.16765	518872			2.16795	1857039			2.16757	518455			2.16755	1459224
2.17055	505354			2.17087	1773749			2.17047	520113			2.17047	1429454
2.17347	494727			2.17378	1715400			2.17338	515744			2.17338	1403382
2.17638	477884			2.1767	1697546			2.1763	516154			2.1763	1381459
2.1793	479036			2.17962	1687321			2.17922	504716			2.1792	1372782
2.1822	474903			2.18252	1682303			2.18212	494064			2.18212	1335651
2.18512	482374			2.18543	1625915			2.18503	486160			2.18503	1309940
2.18803	475622			2.18835	1605960			2.18795	483168			2.18795	1285315
2.19095	459374			2.19127	1598247			2.19087	485944			2.19085	1273374
2.19387	467957			2.19418	1596947			2.19378	483887			2.19377	1245009
2.19677	463728			2.19708	1577048			2.19668	476835			2.19668	1251906
2.19968	452513			2.2	1537551			2.1996	469446			2.1996	1217947
2.2026	453850			2.20292	1506436			2.20252	458119			2.2025	1191729
2.20552	437257			2.20583	1480957			2.20543	454241			2.20542	1167062
2.20842	430163			2.20875	1438851			2.20833	457711			2.20833	1181268
2.21133	425280			2.21165	1425435			2.21125	441896			2.21125	1155672
2.21425	411493			2.21457	1435891			2.21417	437830			2.21417	1127888
2.21717	403528			2.21748	1432202			2.21708	435480			2.21707	1088902
2.22007	396133			2.2204	1424417			2.21998	433554			2.21998	1069820
2.22298	411954			2.22332	1406404			2.2229	425240			2.2229	1063838
2.2259	412219			2.22622	1367420			2.22582	415373			2.22582	1055872
2.22882	406912			2.22913	1345063			2.22873	403089			2.22872	1038447
2.23172	394524			2.23205	1315241			2.23163	401276			2.23163	1010530
2.23463	393463			2.23497	1282785			2.23455	404109			2.23455	991302
2.23755	389038			2.23788	1260438			2.23747	393574			2.23747	974760
2.24047	388698			2.24078	1246748			2.24038	396558			2.24037	939886
2.24338	387206			2.2437	1254859			2.24328	390893			2.24328	894351
2.24628	378758			2.24662	1256652			2.2462	388336			2.2462	828403
2.2492	370802			2.24953	1269161			2.24912	391930			2.24912	755699
2.25212	370666			2.25245	1274461			2.25203	379685			2.25202	662380
2.25503	367928			2.25535	1238255			2.25493	377748			2.25493	583704
2.25793	366080			2.25827	1224525			2.25785	364225			2.25785	506622
2.26085	348151			2.26118	1244076			2.26077	355287			2.26077	437365
2.26377	347306			2.2641	1196460			2.26368	351555			2.26367	377618
2.26668	358179			2.267	1180060			2.2666	357101			2.26658	343844
2.26958	369141			2.26992	1170470			2.2695	354696			2.2695	325144
2.2725	392873			2.27283	1265785			2.27242	362984			2.27242	304958
2.27542	353520			2.27575	1643034			2.27533	352534			2.27533	289277
2.27833	347960			2.27867	2649313			2.27825	350855			2.27823	286646
2.28123	347849			2.28157	4339796			2.28115	346448			2.28115	448528
2.28415	342248			2.28448	6190608			2.28407	378712			2.28407	1009503
2.28707	352454			2.2874	7550823			2.28698	420286			2.28698	1923867
2.28998	355737			2.29032	8255459			2.2899	474944			2.28988	2816783
2.29288	354749			2.29323	8595213			2.2928	528596			2.2928	3170418
2.2958	351468			2.29613	9046682			2.29572	579809			2.29572	2942952
2.29872	344508			2.29905	9829187			2.29863	603832			2.29863	2461068
2.30163	332061			2.30197	10800000			2.30155	601890			2.30153	1907339
2.30455	342021			2.30488	11600000			2.30445	576196			2.30445	1498501
2.30745	344224			2.3078	12000000			2.30737	551445			2.30737	1189069
2.31037	345048			2.3107	11700000			2.31028	529465			2.31028	985253
2.31328	341147			2.31362	11100000			2.3132	509076			2.31318	885166
2.3162	337966			2.31653	10100000			2.3161	493993			2.3161	798473
2.3191	337042			2.31945	9171833			2.31902	482737			2.31902	720336
2.32202	346550			2.32237	8250768			2.32193	459613			2.32193	650072
2.32493	334623			2.32527	7348757			2.32485	456192			2.32483	600707
2.32785	330995			2.32818	6631592			2.32775	455206			2.32775	559220
2.33075	329184			2.3311	5965678			2.33067	455751			2.33067	527006
2.33367	332803			2.33402	5545089			2.33358	462386			2.33358	491590
2.33658	327466			2.33693	5216235			2.3365	447457			2.3365	462708
2.3395	333436			2.33983	4904103			2.33942	449694			2.3394	436625
2.34242	321267			2.34275	4667226			2.34232	439359			2.34232	413474
2.34532	311369			2.34567	4465749			2.34523	445721			2.34523	399022
2.34823	312623			2.34858	4258485			2.34815	434054			2.34815	391090
2.35115	323117			2.35148	4086103			2.35107	441978			2.35105	372563
2.35407	323316			2.3544	3888008			2.35397	438065			2.35397	357363
2.35697	313387			2.35732	3695570			2.35688	430625			2.35688	341135
2.35988	310628			2.36023	3550669			2.3598	420864			2.3598	331320
2.3628	309229			2.36315	3441907			2.36272	428717			2.3627	332707
2.36572	308474			2.36605	3392170			2.36562	443992			2.36562	328069
2.36862	310797			2.36897	3258144			2.36853	442911			2.36853	316072
2.37153	305436			2.37188	3133421			2.37145	446524			2.37145	308943
2.37445	306273			2.3748	3052937			2.37437	449577			2.37435	300812
2.37737	304589			2.37772	2976871			2.37727	451448			2.37727	291457
2.38028	289046			2.38062	2902294			2.38018	441391			2.38018	290147
2.38318	288602			2.38353	2823420			2.3831	432994			2.3831	289512
2.3861	292478			2.38645	2758431			2.38602	423322			2.386	287237
2.38902	291518			2.38937	2653508			2.38892	443112			2.38892	278095
2.39193	270242			2.39228	2579982			2.39183	446180			2.39183	273352
2.39483	265679			2.39518	2527945			2.39475	437243			2.39475	270576
2.39775	277139			2.3981	2477440			2.39767	440091			2.39767	269718
2.40067	283358			2.40102	2432329			2.40057	440220			2.40057	260222
2.40358	265818			2.40393	2351256			2.40348	441796			2.40348	246545
2.40648	255998			2.40685	2355707			2.4064	441504			2.4064	243470
2.4094	251510			2.40975	2308814			2.40932	448161			2.40932	242766
2.41232	254937			2.41267	2261599			2.41223	434446			2.41222	250749
2.41523	250411			2.41558	2264997			2.41513	434554			2.41513	256084
2.41813	260150			2.4185	2257634			2.41805	440850			2.41805	248104
2.42105	255970			2.4214	2196299			2.42097	447606			2.42097	244979
2.42397	247365			2.42432	2113840			2.42388	433811			2.42387	230569
2.42688	241208			2.42723	2063347			2.42678	427845			2.42678	221274
2.42978	237663			2.43015	2042516			2.4297	423887			2.4297	224591
2.4327	235971			2.43307	1999289			2.43262	427259			2.43262	228495
2.43562	224534			2.43597	1974665			2.43553	418467			2.43552	231781
2.43853	219578			2.43888	1944993			2.43843	426985			2.43843	223723
2.44145	217632			2.4418	1921495			2.44135	421005			2.44135	219440
2.44435	228502			2.44472	1905223			2.44427	429191			2.44427	216737
2.44727	229952			2.44763	1905874			2.44718	420701			2.44717	215042
2.45018	229196			2.45053	1891136			2.45008	414480			2.45008	206695
2.4531	226845			2.45345	1821941			2.453	411401			2.453	202728
2.456	242743			2.45637	1779139			2.45592	414072			2.45592	198788
2.45892	237567			2.45928	1761513			2.45883	414680			2.45882	204128
2.46183	238945			2.4622	1737183			2.46173	413266			2.46173	208742
2.46475	239581			2.4651	1725257			2.46465	410878			2.46465	201199
2.46765	249936			2.46802	1746265			2.46757	407099			2.46757	192295
2.47057	251958			2.47093	1678965			2.47048	418547			2.47047	185169
2.47348	277006			2.47385	1606535			2.4734	530141			2.47338	183954
2.4764	459945			2.47677	1551104			2.4763	1080723			2.4763	185886
2.4793	1069393			2.47967	2264820			2.47922	2158880			2.47922	184804
2.48222	2023409			2.48258	7936124			2.48213	3439468			2.48213	186592
2.48513	2959764			2.4855	19000000			2.48505	4375383			2.48503	176376
2.48805	3504491			2.48842	33100000			2.48795	4794746			2.48795	170620
2.49095	3681000			2.49132	45900000			2.49087	4908298			2.49087	171214
2.49387	3685968			2.49423	54400000			2.49378	4787042			2.49378	174061
2.49678	3636777			2.49715	58900000			2.4967	4643733			2.49668	179256
2.4997	3505986			2.50007	62700000			2.4996	4480426			2.4996	168608
2.50262	3396526			2.50298	64300000			2.50252	4340825			2.50252	170193
2.50552	3264409			2.50588	63800000			2.50543	4150968			2.50543	164448
2.50843	3147472			2.5088	60900000			2.50835	4006684			2.50833	168079
2.51135	2995987			2.51172	57000000			2.51125	3872684			2.51125	167184
2.51427	2890246			2.51463	51900000			2.51417	3745337			2.51417	167041
2.51717	2784180			2.51755	47700000			2.51708	3607954			2.51708	163747
2.52008	2713959			2.52045	44000000			2.52	3520590			2.51998	174532
2.523	2629533			2.52337	41000000			2.5229	3427643			2.5229	179330
2.52592	2569411			2.52628	38200000			2.52582	3352182			2.52582	185111
2.52883	2497042			2.5292	36600000			2.52873	3248522			2.52873	195344
2.53173	2416161			2.53212	34700000			2.53165	3100700			2.53163	203918
2.53465	2357364			2.53502	33300000			2.53457	3124994			2.53455	205142
2.53757	2307110			2.53793	32000000			2.53747	3050718			2.53747	201049
2.54048	2282761			2.54085	30600000			2.54038	2983544			2.54038	192588
2.54338	2252764			2.54377	28800000			2.5433	2889517			2.54328	197025
2.5463	2209214			2.54668	27800000			2.54622	2810253			2.5462	191495
2.54922	2161505			2.54958	26800000			2.54912	2748323			2.54912	187383
2.55213	2122081			2.5525	25800000			2.55203	2695634			2.55203	182007
2.55503	2121957			2.55542	24900000			2.55495	2668506			2.55495	176900
2.55795	2107450			2.55833	24000000			2.55787	2618658			2.55785	175663
2.56087	2093008			2.56123	23300000			2.56077	2570404			2.56077	173900
2.56378	2077993			2.56415	22700000			2.56368	2535491			2.56368	173089
2.5667	2061388			2.56707	22100000			2.5666	2504434			2.5666	171734
2.5696	2059191			2.56998	21900000			2.56952	2461610			2.5695	181977
2.57252	2045866			2.5729	21300000			2.57242	2422257			2.57242	166929
2.57543	2030044			2.5758	20400000			2.57533	2370221			2.57533	163760
2.57835	1992707			2.57872	19900000			2.57825	2331330			2.57825	164514
2.58125	1990412			2.58163	19500000			2.58117	2280771			2.58115	163227
2.58417	1961089			2.58455	19300000			2.58408	2239966			2.58407	164785
2.58708	1963569			2.58747	18400000			2.58698	2179367			2.58698	170212
2.59	1966543			2.59037	17900000			2.5899	2131010			2.5899	168697
2.59292	1991769			2.59328	17500000			2.59282	2102974			2.5928	154592
2.59582	1991084			2.5962	17200000			2.59573	2101023			2.59572	157642
2.59873	2001299			2.59912	16800000			2.59863	2095367			2.59863	156374
2.60165	1976357			2.60203	16500000			2.60155	2057688			2.60155	152897
2.60457	1985923			2.60493	16100000			2.60447	2010195			2.60445	147745
2.60747	2002580			2.60785	15700000			2.60738	2004666			2.60737	154119
2.61038	2025835			2.61077	15500000			2.61028	1999242			2.61028	147501
2.6133	2052745			2.61368	15200000			2.6132	1971140			2.6132	153894
2.61622	2078303			2.6166	15000000			2.61612	1922819			2.61612	148767
2.61913	2074683			2.6195	14700000			2.61903	1888380			2.61902	151682
2.62203	2038415			2.62242	14800000			2.62193	1870356			2.62193	159389
2.62495	2005000			2.62533	14700000			2.62485	1834593			2.62485	151922
2.62787	1936042			2.62825	14400000			2.62777	1828218			2.62777	153558
2.63078	1863975			2.63115	13800000			2.63068	1832196			2.63067	148555
2.63368	1799755			2.63407	13900000			2.6336	1844146			2.63358	142696
2.6366	1748405			2.63698	13700000			2.6365	1818512			2.6365	141063
2.63952	1720183			2.6399	13400000			2.63942	1777637			2.63942	137714
2.64243	1696488			2.64282	13200000			2.64233	1743228			2.64232	141834
2.64533	1670510			2.64572	12900000			2.64525	1724081			2.64523	156946
2.64825	1624030			2.64863	12500000			2.64815	1705870			2.64815	154163
2.65117	1615358			2.65155	12300000			2.65107	1669231			2.65107	150744
2.65408	1595268			2.65447	12300000			2.65398	1640854			2.65397	140997
2.657	1596529			2.65738	12100000			2.6569	1607824			2.65688	137868
2.6599	1595602			2.66028	11800000			2.6598	1596436			2.6598	141797
2.66282	1585054			2.6632	11600000			2.66272	1588367			2.66272	130804
2.66573	1586750			2.66612	11400000			2.66563	1590290			2.66562	136677
2.66865	1570800			2.66903	11400000			2.66855	1587447			2.66853	143664
2.67155	1559464			2.67195	11300000			2.67147	1571327			2.67145	146817
2.67447	1567543			2.67485	11100000			2.67437	1567491			2.67437	145700
2.67738	1560450			2.67777	11100000			2.67728	1548298			2.67727	144720
2.6803	1544506			2.68068	10900000			2.6802	1536735			2.68018	146192
2.6832	1527626			2.6836	10800000			2.68312	1514935			2.6831	142949
2.68612	1507263			2.68652	10700000			2.68602	1495039			2.68602	137641
2.68903	1509182			2.68942	10300000			2.68893	1471604			2.68893	142439
2.69195	1469669			2.69233	10200000			2.69185	1451959			2.69183	131073
2.69487	1473933			2.69525	10100000			2.69477	1445072			2.69475	126622
2.69777	1485231			2.69817	10200000			2.69767	1437101			2.69767	132815
2.70068	1495190			2.70107	9896099			2.70058	1408636			2.70058	128401
2.7036	1475288			2.70398	9772706			2.7035	1418362			2.70348	127357
2.70652	1453120			2.7069	9843144			2.70642	1408036			2.7064	137846
2.70942	1427446			2.70982	9675889			2.70933	1384716			2.70932	145365
2.71233	1431753			2.71273	9572982			2.71223	1368532			2.71223	133040
2.71525	1430704			2.71563	9288019			2.71515	1358856			2.71513	130695
2.71817	1426521			2.71855	9267965			2.71807	1331035			2.71805	126954
2.72108	1407106			2.72147	9127714			2.72098	1321156			2.72097	129997
2.72398	1390302			2.72438	9016250			2.72388	1309082			2.72388	134719
2.7269	1380747			2.7273	8879286			2.7268	1297925			2.72678	131761
2.72982	1360872			2.7302	8821959			2.72972	1284785			2.7297	125284
2.73273	1353153			2.73312	8668163			2.73263	1278743			2.73262	122328
2.73563	1337337			2.73603	8560435			2.73553	1260911			2.73553	119980
2.73855	1332449			2.73895	8676209			2.73845	1237875			2.73843	118343
2.74147	1324455			2.74187	8407740			2.74137	1229839			2.74135	122506
2.74438	1318941			2.74477	8335191			2.74428	1229881			2.74427	121709
2.74728	1283466			2.74768	8282049			2.74718	1224223			2.74718	121885
2.7502	1271651			2.7506	8443985			2.7501	1213430			2.75008	125903
2.75312	1287230			2.75352	8381767			2.75302	1184541			2.753	129858
2.75603	1263192			2.75643	8301362			2.75593	1165644			2.75592	125593
2.75895	1248816			2.75933	8172211			2.75885	1156004			2.75883	118763
2.76185	1239801			2.76225	8108060			2.76175	1148215			2.76175	112105
2.76477	1219850			2.76517	8026453			2.76467	1130670			2.76465	121381
2.76768	1229833			2.76808	7733446			2.76758	1128821			2.76757	125727
2.7706	1225584			2.77098	7676725			2.7705	1109779			2.77048	125209
2.7735	1238793			2.7739	7828108			2.7734	1112044			2.7734	123660
2.77642	1208337			2.77682	7736660			2.77632	1089900			2.7763	132534
2.77933	1193722			2.77973	7522592			2.77923	1093864			2.77922	132105
2.78225	1188309			2.78265	7572998			2.78215	1119456			2.78213	138598
2.78515	1187343			2.78555	7531493			2.78505	1387767			2.78505	153825
2.78807	1182442			2.78847	7462424			2.78797	2510959			2.78795	178273
2.79098	1435825			2.79138	7314131			2.79088	5276258			2.79087	188980
2.7939	2754018			2.7943	7376251			2.7938	9530412			2.79378	190295
2.79682	5942910			2.79722	7746023			2.7967	14600000			2.7967	190900
2.79972	10900000			2.80012	9219733			2.79962	19600000			2.7996	231504
2.80263	16600000			2.80303	12700000			2.80253	24300000			2.80252	475306
2.80555	22000000			2.80595	19000000			2.80545	28300000			2.80543	1040894
2.80847	27100000			2.80887	26700000			2.80837	32000000			2.80835	1793563
2.81137	31600000			2.81178	34800000			2.81127	35500000			2.81125	2429876
2.81428	35800000			2.81468	42200000			2.81418	38800000			2.81417	2724808
2.8172	39600000			2.8176	48500000			2.8171	41900000			2.81708	2775413
2.82012	43100000			2.82052	53400000			2.82002	44500000			2.82	2687987
2.82302	46200000			2.82343	56500000			2.82292	47000000			2.8229	2581416
2.82593	49000000			2.82635	57700000			2.82583	49200000			2.82582	2426515
2.82885	51700000			2.82925	56600000			2.82875	51300000			2.82873	2265491
2.83177	54300000			2.83217	53700000			2.83167	53300000			2.83165	2133837
2.83468	56700000			2.83508	49500000			2.83458	55000000			2.83457	2016383
2.83758	58700000			2.838	45300000			2.83748	56700000			2.83747	1902159
2.8405	60500000			2.84092	41100000			2.8404	57700000			2.84038	1801671
2.84342	62100000			2.84382	37700000			2.84332	57300000			2.8433	1692848
2.84633	63700000			2.84673	35000000			2.84623	53500000			2.84622	1607412
2.84923	65200000			2.84965	32900000			2.84913	46700000			2.84912	1541087
2.85215	66600000			2.85257	31700000			2.85205	39500000			2.85203	1488641
2.85507	67800000			2.85547	30900000			2.85497	34800000			2.85495	1434910
2.85798	69000000			2.85838	31100000			2.85788	32500000			2.85787	1408798
2.8609	70100000			2.8613	31500000			2.86078	31100000			2.86077	1368617
2.8638	71300000			2.86422	32200000			2.8637	30000000			2.86368	1329871
2.86672	72500000			2.86713	32700000			2.86662	29000000			2.8666	1289853
2.86963	73400000			2.87003	32900000			2.86953	28200000			2.86952	1267807
2.87255	74400000			2.87295	32300000			2.87245	27300000			2.87242	1230512
2.87545	75300000			2.87587	31400000			2.87535	26500000			2.87533	1191651
2.87837	75300000			2.87878	30000000			2.87827	25700000			2.87825	1162152
2.88128	70800000			2.8817	28500000			2.88118	25000000			2.88117	1127393
2.8842	60600000			2.8846	27200000			2.8841	24300000			2.88407	1094055
2.88712	49600000			2.88752	26000000			2.887	23700000			2.88698	1041523
2.89002	42900000			2.89043	24800000			2.88992	23100000			2.8899	1003836
2.89293	40900000			2.89335	23700000			2.89283	22600000			2.89282	974800
2.89585	39700000			2.89627	23100000			2.89575	22000000			2.89573	957243
2.89877	38600000			2.89917	22500000			2.89867	21500000			2.89863	936642
2.90167	37600000			2.90208	21800000			2.90157	21100000			2.90155	915442
2.90458	36700000			2.905	21000000			2.90448	20600000			2.90447	897251
2.9075	35800000			2.90792	20500000			2.9074	20200000			2.90738	865376
2.91042	35100000			2.91083	19900000			2.91032	19800000			2.91028	850735
2.91333	34300000			2.91373	19400000			2.91322	19500000			2.9132	845836
2.91623	33700000			2.91665	18800000			2.91613	19100000			2.91612	831550
2.91915	33200000			2.91957	18400000			2.91905	18800000			2.91903	815378
2.92207	32500000			2.92248	18000000			2.92197	18500000			2.92193	785191
2.92498	31800000			2.92538	17600000			2.92488	18100000			2.92485	790946
2.92788	31300000			2.9283	17300000			2.92778	17700000			2.92777	769389
2.9308	30900000			2.93122	17100000			2.9307	17400000			2.93068	775922
2.93372	30400000			2.93413	16700000			2.93362	17200000			2.93358	766289
2.93663	29900000			2.93705	16500000			2.93653	17000000			2.9365	773625
2.93955	29300000			2.93995	16100000			2.93943	16700000			2.93942	826131
2.94245	28900000			2.94287	15800000			2.94235	16400000			2.94233	874906
2.94537	28400000			2.94578	15700000			2.94527	16200000			2.94523	928547
2.94828	28000000			2.9487	15600000			2.94818	16000000			2.94815	949315
2.9512	27500000			2.95162	15400000			2.95108	15900000			2.95107	955429
2.9541	27100000			2.95452	15100000			2.954	15600000			2.95398	946103
2.95702	26700000			2.95743	14800000			2.95692	15200000			2.95688	921644
2.95993	26300000			2.96035	14600000			2.95983	15000000			2.9598	900054
2.96285	25900000			2.96327	14400000			2.96275	14800000			2.96272	861730
2.96577	25600000			2.96618	14300000			2.96565	14700000			2.96563	827660
2.96867	25200000			2.96908	14000000			2.96857	14500000			2.96853	802138
2.97158	24900000			2.972	13800000			2.97148	14400000			2.97145	776710
2.9745	24500000			2.97492	13600000			2.9744	14200000			2.97437	728098
2.97742	24200000			2.97783	13500000			2.9773	13900000			2.97728	680718
2.98032	24000000			2.98075	13300000			2.98022	13700000			2.9802	625615
2.98323	23800000			2.98365	13200000			2.98313	13400000			2.9831	566038
2.98615	23500000			2.98657	12900000			2.98605	13300000			2.98602	522289
2.98907	23000000			2.98948	12800000			2.98897	13200000			2.98893	465548
2.99197	22700000			2.9924	12500000			2.99187	13100000			2.99185	436175
2.99488	22300000			2.9953	12300000			2.99478	12900000			2.99475	400524
2.9978	21900000			2.99822	12400000			2.9977	12800000			2.99767	370751
3.00072	21500000			3.00113	12300000			3.00062	12600000			3.00058	342278
3.00363	21200000			3.00405	12100000			3.00352	12400000			3.0035	317145
3.00653	20900000			3.00697	11900000			3.00643	12300000			3.0064	305606
3.00945	20700000			3.00987	11800000			3.00935	12100000			3.00932	289679
3.01237	20400000			3.01278	11700000			3.01227	12000000			3.01223	273165
3.01528	20100000			3.0157	11500000			3.01518	11800000			3.01515	273182
3.01818	19900000			3.01862	11400000			3.01808	11700000			3.01805	264695
3.0211	19600000			3.02153	11200000			3.021	11600000			3.02097	258877
3.02402	19300000			3.02443	11100000			3.02392	11400000			3.02388	248303
3.02693	19000000			3.02735	11200000			3.02683	11400000			3.0268	251260
3.02985	18600000			3.03027	11100000			3.02973	11200000			3.0297	244013
3.03275	18400000			3.03318	11000000			3.03265	11100000			3.03262	253312
3.03567	18200000			3.0361	10800000			3.03557	11000000			3.03553	229243
3.03858	18000000			3.039	10700000			3.03848	10900000			3.03845	220594
3.0415	17700000			3.04192	10700000			3.04138	10800000			3.04135	214584
3.0444	17400000			3.04483	10700000			3.0443	10600000			3.04427	211388
3.04732	17100000			3.04775	10600000			3.04722	10400000			3.04718	221119
3.05023	16800000			3.05067	10500000			3.05013	10300000			3.0501	229424
3.05315	16600000			3.05357	10400000			3.05305	10300000			3.05302	214700
3.05607	16400000			3.05648	10200000			3.05595	10200000			3.05592	213646
3.05897	16100000			3.0594	10000000			3.05887	10000000			3.05883	202824
3.06188	15900000			3.06232	9889535			3.06178	9907528			3.06175	206715
3.0648	15700000			3.06522	9810676			3.0647	9791169			3.06467	200492
3.06772	15400000			3.06813	9616170			3.0676	9697332			3.06757	199692
3.07062	15300000			3.07105	9585093			3.07052	9654724			3.07048	203576
3.07353	15100000			3.07397	9549876			3.07343	9618120			3.0734	189472
3.07645	14900000			3.07688	9481391			3.07635	9530036			3.07632	188002
3.07937	14700000			3.07978	9449418			3.07927	9435314			3.07922	187080
3.08228	14500000			3.0827	9334930			3.08217	9316304			3.08213	184148
3.08518	14200000			3.08562	9150153			3.08508	9306371			3.08505	183152
3.0881	13900000			3.08853	9089582			3.088	9174440			3.08797	181758
3.09102	13800000			3.09145	9037137			3.09092	9061093			3.09087	186011
3.09393	13600000			3.09435	9098912			3.09382	8888944			3.09378	185346
3.09683	13400000			3.09727	8944653			3.09673	8840672			3.0967	182910
3.09975	13200000			3.10018	8838965			3.09965	8767183			3.09962	176877
3.10267	13100000			3.1031	8818823			3.10257	8687738			3.10252	176721
3.10558	12900000			3.10602	8896632			3.10548	8616571			3.10543	175983
3.1085	12700000			3.10892	8876427			3.10838	8527951			3.10835	170171
3.1114	12500000			3.11183	8750419			3.1113	8514751			3.11127	168524
3.11432	12300000			3.11475	8529487			3.11422	8461999			3.11417	165418
3.11723	12100000			3.11767	8541214			3.11713	8426463			3.11708	166011
3.12015	11900000			3.12058	8324511			3.12003	8335901			3.12	160973
3.12305	11700000			3.12348	8436242			3.12295	8303776			3.12292	149943
3.12597	11500000			3.1264	8385588			3.12587	8270046			3.12582	153882
3.12888	11400000			3.12932	8340899			3.12878	8255277			3.12873	162681
3.1318	11200000			3.13223	8249612			3.13168	8211686			3.13165	156760
3.13472	11100000			3.13513	8154509			3.1346	8145948			3.13457	155161
3.13762	10900000			3.13805	8018716			3.13752	8072911			3.13748	153462
3.14053	10800000			3.14097	8084373			3.14043	8012301			3.14038	148543
3.14345	10700000			3.14388	8103030			3.14335	7994172			3.1433	152226
3.14637	10600000			3.1468	8038688			3.14625	7997305			3.14622	145620
3.14927	10600000			3.1497	7960726			3.14917	7952080			3.14913	149324
3.15218	10600000			3.15262	7885041			3.15208	7862084			3.15203	150912
3.1551	10600000			3.15553	7920718			3.155	7781691			3.15495	149046
3.15802	10700000			3.15845	7857127			3.1579	7728176			3.15787	142579
3.16092	10700000			3.16137	7962990			3.16082	7684610			3.16078	141576
3.16383	10800000			3.16427	7780478			3.16373	7614806			3.16368	146512
3.16675	10900000			3.16718	7780365			3.16665	7605846			3.1666	146368
3.16967	11100000			3.1701	7616134			3.16957	7546302			3.16952	145340
3.17258	11400000			3.17302	7644139			3.17247	7541183			3.17243	134031
3.17548	11600000			3.17593	7795504			3.17538	7476963			3.17533	137281
3.1784	11700000			3.17883	7806217			3.1783	7450612			3.17825	140240
3.18132	11700000			3.18175	7756416			3.18122	7410172			3.18117	148009
3.18423	11600000			3.18467	7776820			3.18412	7341767			3.18408	141248
3.18713	11600000			3.18758	7643718			3.18703	7350548			3.18698	134603
3.19005	11500000			3.1905	7729427			3.18995	7273595			3.1899	134694
3.19297	11500000			3.1934	7661527			3.19287	7302725			3.19282	134725
3.19588	11500000			3.19632	7609230			3.19578	7232702			3.19573	138780
3.1988	11400000			3.19923	7685239			3.19868	7175234			3.19863	141892
3.2017	11300000			3.20215	7687724			3.2016	7082592			3.20155	140629
3.20462	11200000			3.20507	7699060			3.20452	7027637			3.20447	144477
3.20753	11300000			3.20797	7631997			3.20743	6987011			3.20738	135468
3.21045	11300000			3.21088	7622719			3.21033	6948650			3.2103	130924
3.21335	11200000			3.2138	7547960			3.21325	6851911			3.2132	139820
3.21627	11200000			3.21672	7457219			3.21617	6790160			3.21612	135802
3.21918	11100000			3.21963	7394403			3.21908	6801901			3.21903	143362
3.2221	11000000			3.22253	7481013			3.222	6777035			3.22195	141387
3.22502	10900000			3.22545	7452243			3.2249	6727291			3.22485	140482
3.22792	10800000			3.22837	7344870			3.22782	6605953			3.22777	135882
3.23083	10800000			3.23128	7292072			3.23073	6643158			3.23068	147503
3.23375	10700000			3.23418	7294608			3.23365	6568289			3.2336	143626
3.23667	10700000			3.2371	7432820			3.23655	6551052			3.2365	149036
3.23957	10600000			3.24002	7480524			3.23947	6509300			3.23942	140439
3.24248	10500000			3.24293	7520981			3.24238	6484015			3.24233	130019
3.2454	10500000			3.24585	7538632			3.2453	6447445			3.24525	128159
3.24832	10400000			3.24875	7332813			3.2482	6437293			3.24815	140562
3.25123	10400000			3.25167	7004468			3.25112	6433026			3.25107	153626
3.25413	10500000			3.25458	6673002			3.25403	6500388			3.25398	156591
3.25705	10600000			3.2575	6574712			3.25695	6522285			3.2569	189041
3.25997	10700000			3.26042	6586781			3.25987	6615976			3.2598	212122
3.26288	10900000			3.26332	6679759			3.26277	6620547			3.26272	255168
3.26578	10900000			3.26623	6739272			3.26568	6632304			3.26563	295144
3.2687	11000000			3.26915	6774823			3.2686	6590627			3.26855	348072
3.27162	10900000			3.27207	6869304			3.27152	6584623			3.27147	385417
3.27453	10900000			3.27498	7095915			3.27442	6545240			3.27437	401638
3.27743	10700000			3.27788	7249916			3.27733	6427400			3.27728	404203
3.28035	10600000			3.2808	7307480			3.28025	6345614			3.2802	388345
3.28327	10400000			3.28372	7273777			3.28317	6261865			3.28312	377278
3.28618	10200000			3.28663	7284683			3.28607	6232525			3.28602	345638
3.2891	10000000			3.28955	7079980			3.28898	6130268			3.28893	334348
3.292	9970774			3.29245	6857961			3.2919	6101654			3.29185	314458
3.29492	9849052			3.29537	6557918			3.29482	6047107			3.29477	324053
3.29783	9762023			3.29828	6357273			3.29772	5986873			3.29767	307021
3.30075	9641338			3.3012	6097342			3.30063	5911425			3.30058	293371
3.30365	9589492			3.3041	5860374			3.30355	5839869			3.3035	278505
3.30657	9482991			3.30702	5642567			3.30647	5789344			3.30642	260250
3.30948	9418488			3.30993	5523541			3.30938	5757897			3.30932	241670
3.3124	9334683			3.31285	5384870			3.31228	5714646			3.31223	239980
3.31532	9302000			3.31577	5203908			3.3152	5695093			3.31515	239323
3.31822	9223916			3.31867	5012242			3.31812	5672059			3.31807	236586
3.32113	9200468			3.32158	4849522			3.32103	5666826			3.32097	229886
3.32405	9134737			3.3245	4751404			3.32393	5628653			3.32388	229194
3.32697	9125865			3.32742	4704963			3.32685	5579436			3.3268	218449
3.32987	9082086			3.33033	4684271			3.32977	5511876			3.32972	214577
3.33278	9011955			3.33323	4632018			3.33268	5455478			3.33262	208813
3.3357	8925716			3.33615	4588688			3.33558	5398308			3.33553	210190
3.33862	8791344			3.33907	4538816			3.3385	5361254			3.33845	202389
3.34153	8735765			3.34198	4437773			3.34142	5347787			3.34137	215794
3.34443	8662623			3.3449	4362331			3.34433	5322362			3.34427	195785
3.34735	8631572			3.3478	4307101			3.34723	5312027			3.34718	190989
3.35027	8608485			3.35072	4316226			3.35015	5227690			3.3501	216477
3.35318	8584096			3.35363	4319497			3.35307	5214047			3.35302	194719
3.35608	8527611			3.35655	4231470			3.35598	5184081			3.35593	200204
3.359	8412805			3.35947	4211059			3.3589	5145057			3.35883	190104
3.36192	8358353			3.36237	4139389			3.3618	5096936			3.36175	183267
3.36483	8315841			3.36528	4069452			3.36472	5107589			3.36467	177008
3.36775	8288569			3.3682	4060945			3.36763	5114166			3.36758	179337
3.37065	8223240			3.37112	4011825			3.37055	5082212			3.37048	182021
3.37357	8201603			3.37402	3957139			3.37345	5046960			3.3734	180848
3.37648	8169261			3.37693	3945478			3.37637	5035118			3.37632	167103
3.3794	8104278			3.37985	3895560			3.37928	4987199			3.37923	172190
3.3823	8002789			3.38277	3779962			3.3822	4955841			3.38213	170944
3.38522	7956705			3.38568	3745095			3.3851	4926795			3.38505	175977
3.38813	7869622			3.38858	3822595			3.38802	4906422			3.38797	166748
3.39105	7835473			3.3915	3777889			3.39093	4878303			3.39088	167388
3.39395	7774552			3.39442	3759091			3.39385	4851880			3.39378	166876
3.39687	7754599			3.39733	3705575			3.39677	4815398			3.3967	167570
3.39978	7716427			3.40025	3714098			3.39967	4808907			3.39962	169058
3.4027	7698601			3.40315	3709245			3.40258	4750490			3.40253	158067
3.40562	7643275			3.40607	3721936			3.4055	4730315			3.40543	160449
3.40852	7626290			3.40898	3641211			3.40842	4713657			3.40835	148926
3.41143	7574986			3.4119	3646729			3.41132	4692658			3.41127	143670
3.41435	7509414			3.41482	3621796			3.41423	4695912			3.41418	142563
3.41727	7462391			3.41772	3634116			3.41715	4619520			3.4171	145209
3.42017	7400713			3.42063	3613091			3.42007	4589385			3.42	148992
3.42308	7347350			3.42355	3650587			3.42297	4572498			3.42292	144828
3.426	7334375			3.42647	3649200			3.42588	4611001			3.42583	132879
3.42892	7339991			3.42938	3670551			3.4288	4574496			3.42875	127076
3.43183	7338296			3.43228	3626994			3.43172	4561461			3.43165	128600
3.43473	7339031			3.4352	3534918			3.43463	4598509			3.43457	136102
3.43765	7299647			3.43812	3498689			3.43753	4601905			3.43748	131574
3.44057	7265608			3.44103	3448372			3.44045	4559656			3.4404	132300
3.44348	7176679			3.44393	3446663			3.44337	4505940			3.4433	136452
3.44638	7096732			3.44685	3449387			3.44628	4497669			3.44622	147604
3.4493	7099877			3.44977	3455981			3.44918	4503842			3.44913	171213
3.45222	7086226			3.45268	3394230			3.4521	4455197			3.45205	199978
3.45513	7054057			3.4556	3364607			3.45502	4407773			3.45495	240114
3.45805	6929875			3.4585	3388724			3.45793	4411399			3.45787	265536
3.46095	6923052			3.46142	3359502			3.46083	4398804			3.46078	287678
3.46387	6887332			3.46433	3310408			3.46375	4373264			3.4637	297986
3.46678	6895572			3.46725	3222860			3.46667	4328660			3.4666	310430
3.4697	6865683			3.47017	3242782			3.46958	4326309			3.46952	318558
3.4726	6833404			3.47307	3224622			3.47248	4307361			3.47243	303712
3.47552	6782988			3.47598	3248761			3.4754	4267174			3.47535	302387
3.47843	6777303			3.4789	3201314			3.47832	4216990			3.47825	307666
3.48135	6708713			3.48182	3148364			3.48123	4234597			3.48117	297274
3.48425	6650981			3.48473	3076184			3.48415	4228773			3.48408	298577
3.48717	6611976			3.48763	3112583			3.48705	4213572			3.487	291068
3.49008	6591850			3.49055	3132358			3.48997	4180583			3.4899	282294
3.493	6552246			3.49347	3160825			3.49288	4168367			3.49282	272211
3.49592	6498021			3.49638	3118708			3.4958	4163052			3.49573	268757
3.49882	6459284			3.4993	3014653			3.4987	4126753			3.49865	241178
3.50173	6467414			3.5022	2984991			3.50162	4097939			3.50157	234445
3.50465	6485948			3.50512	2946926			3.50453	4055385			3.50447	235037
3.50757	6466031			3.50803	2903773			3.50745	4026198			3.50738	223188
3.51047	6396998			3.51095	2919611			3.51035	3992827			3.5103	212020
3.51338	6313038			3.51385	2967656			3.51327	4008921			3.51322	209210
3.5163	6284156			3.51677	2980749			3.51618	4015720			3.51612	200711
3.51922	6263547			3.51968	2977726			3.5191	4011848			3.51903	198848
3.52213	6219059			3.5226	2889641			3.522	3963056			3.52195	190717
3.52503	6197687			3.52552	2804840			3.52492	3916831			3.52487	195183
3.52795	6171594			3.52842	2821845			3.52783	3878714			3.52777	196462
3.53087	6130515			3.53133	2832802			3.53075	3889850			3.53068	206786
3.53378	6062012			3.53425	2881661			3.53367	3884216			3.5336	195813
3.53668	6006615			3.53717	2876305			3.53657	3887954			3.53652	187064
3.5396	5987335			3.54008	2924147			3.53948	3865492			3.53942	181314
3.54252	5924995			3.54298	2918785			3.5424	3865137			3.54233	185270
3.54543	5895774			3.5459	2919382			3.54532	3849651			3.54525	181062
3.54835	5785268			3.54882	2828772			3.54822	3837314			3.54817	174256
3.55125	5750693			3.55173	2749384			3.55113	3808371			3.55107	175511
3.55417	5744321			3.55465	2579314			3.55405	3797581			3.55398	177391
3.55708	5749108			3.55755	2407126			3.55697	3781814			3.5569	173530
3.56	5712155			3.56047	2223482			3.55987	3748180			3.55982	164017
3.5629	5650142			3.56338	2133675			3.56278	3727200			3.56272	171325
3.56582	5562592			3.5663	1999257			3.5657	3732870			3.56563	166388
3.56873	5504081			3.56922	1863001			3.56862	3740430			3.56855	169082
3.57165	5420729			3.57212	1758822			3.57153	3736285			3.57147	163297
3.57455	5373507			3.57503	1713736			3.57443	3758305			3.57438	169103
3.57747	5366796			3.57795	1642935			3.57735	3750160			3.57728	162958
3.58038	5339377			3.58087	1621758			3.58027	3714500			3.5802	155419
3.5833	5311484			3.58377	1557225			3.58318	3691966			3.58312	153963
3.58622	5233473			3.58668	1508514			3.58608	3688733			3.58603	153921
3.58912	5230941			3.5896	1461285			3.589	3688486			3.58893	152194
3.59203	5190975			3.59252	1455672			3.59192	3674743			3.59185	161327
3.59495	5149060			3.59543	1392706			3.59483	3607806			3.59477	152094
3.59787	5105597			3.59833	1374920			3.59773	3539591			3.59768	148714
3.60077	5106688			3.60125	1304219			3.60065	3533081			3.60058	143040
3.60368	5086563			3.60417	1284334			3.60357	3515800			3.6035	134403
3.6066	5028166			3.60708	1227408			3.60648	3530505			3.60642	126139
3.60952	5007391			3.61	1203754			3.6094	3484975			3.60933	130845
3.61243	4996661			3.6129	1179827			3.6123	3505032			3.61223	122137
3.61533	5004340			3.61582	1164443			3.61522	3470656			3.61515	124036
3.61825	4998078			3.61873	1144057			3.61813	3464779			3.61807	119508
3.62117	5010904			3.62165	1107506			3.62105	3435977			3.62098	113172
3.62408	5003588			3.62457	1113932			3.62395	3425838			3.62388	113058
3.62698	5031301			3.62747	1092436			3.62687	3466441			3.6268	115556
3.6299	5046267			3.63038	1133932			3.62978	3449472			3.62972	111833
3.63282	5045448			3.6333	1125869			3.6327	3401136			3.63263	112436
3.63573	5020097			3.63622	1106211			3.6356	3349226			3.63553	110690
3.63865	5018967			3.63913	1069679			3.63852	3327410			3.63845	108471
3.64155	5031455			3.64203	1076754			3.64143	3289026			3.64137	110869
3.64447	5023509			3.64495	1062417			3.64435	3303361			3.64428	110730
3.64738	4993248			3.64787	1045759			3.64725	3324594			3.6472	110315
3.6503	4979520			3.65078	1075523			3.65017	3262870			3.6501	110537
3.6532	4970777			3.65368	1015994			3.65308	3253476			3.65302	109225
3.65612	4956188			3.6566	1075005			3.656	3244173			3.65593	105070
3.65903	4952309			3.65952	1015203			3.65892	3288517			3.65885	99918.6
3.66195	4961601			3.66243	980525			3.66182	3256432			3.66175	107961
3.66485	4964706			3.66535	967590			3.66473	3241908			3.66467	117179
3.66777	4922454			3.66825	948793			3.66765	3202311			3.66758	106720
3.67068	4890900			3.67117	947153			3.67057	3200028			3.6705	108574
3.6736	4808585			3.67408	998042			3.67347	3185640			3.6734	110664
3.67652	4795642			3.677	993907			3.67638	3161413			3.67632	107096
3.67942	4790954			3.67992	997018			3.6793	3132569			3.67923	114966
3.68233	4778879			3.68282	1024821			3.68222	3105420			3.68215	116224
3.68525	4734417			3.68573	1033974			3.68512	3103113			3.68505	120093
3.68817	4708451			3.68865	1024674			3.68803	3088941			3.68797	115994
3.69107	4704750			3.69157	1258687			3.69095	3071378			3.69088	119531
3.69398	4674733			3.69448	1678748			3.69387	3069207			3.6938	122609
3.6969	4634610			3.69738	2001966			3.69677	3054451			3.6967	130693
3.69982	4596024			3.7003	2218067			3.69968	3038647			3.69962	131085
3.70273	4619349			3.70322	2230034			3.7026	3027991			3.70253	134239
3.70563	4607810			3.70613	2161197			3.70552	3003254			3.70545	136695
3.70855	4578369			3.70905	2128275			3.70843	2989710			3.70835	137044
3.71147	4525150			3.71195	2015810			3.71133	2980923			3.71127	131224
3.71438	4514188			3.71487	1983028			3.71425	2965261			3.71418	124697
3.71728	4518629			3.71778	1867270			3.71717	2965395			3.7171	128846
3.7202	4503395			3.7207	1827675			3.72008	2948757			3.72002	127464
3.72312	4523676			3.7236	1752790			3.72298	2939971			3.72292	129573
3.72603	4461746			3.72652	1712962			3.7259	2898318			3.72583	128584
3.72893	4449787			3.72943	1648178			3.72882	2868550			3.72875	123563
3.73185	4386848			3.73235	1595653			3.73173	2831865			3.73167	125766
3.73477	4338868			3.73527	1521679			3.73463	2846583			3.73457	123979
3.73768	4314068			3.73817	1541014			3.73755	2848003			3.73748	124970
3.7406	4330611			3.74108	1507198			3.74047	2830525			3.7404	127277
3.7435	4339404			3.744	1450649			3.74338	2826396			3.74332	122702
3.74642	4325188			3.74692	1482451			3.74628	2826525			3.74622	130225
3.74933	4317420			3.74983	1434740			3.7492	2826562			3.74913	127534
3.75225	4302255			3.75273	1418747			3.75212	2807939			3.75205	126212
3.75515	4292322			3.75565	1415598			3.75503	2804708			3.75497	130281
3.75807	4307002			3.75857	1387680			3.75795	2779869			3.75787	136047
3.76098	4268734			3.76148	1391583			3.76085	2762416			3.76078	123658
3.7639	4279121			3.7644	1418449			3.76377	2744328			3.7637	129070
3.76682	4245599			3.7673	1361755			3.76668	2740102			3.76662	130102
3.76972	4243698			3.77022	1418662			3.7696	2748316			3.76952	129397
3.77263	4195205			3.77313	1363002			3.7725	2752032			3.77243	126297
3.77555	4150482			3.77605	1308616			3.77542	2709092			3.77535	123944
3.77847	4139520			3.77897	1287833			3.77833	2717798			3.77827	124195
3.78137	4160746			3.78187	1250322			3.78125	2685942			3.78118	122272
3.78428	4163237			3.78478	1244394			3.78415	2674239			3.78408	120614
3.7872	4138667			3.7877	1199997			3.78707	2661742			3.787	117820
3.79012	4087327			3.79062	1204024			3.78998	2662552			3.78992	112106
3.79302	4053288			3.79352	1185654			3.7929	2627911			3.79283	117214
3.79593	4047224			3.79643	1164366			3.7958	2602773			3.79573	115376
3.79885	4061411			3.79935	1155994			3.79872	2591002			3.79865	111998
3.80177	4023433			3.80227	1141044			3.80163	2632577			3.80157	107395
3.80468	4021328			3.80518	1110878			3.80455	2623217			3.80448	116428
3.80758	4020190			3.80808	1094549			3.80747	2627292			3.80738	129503
3.8105	4016928			3.811	1086669			3.81037	2617671			3.8103	132913
3.81342	4008321			3.81392	1082539			3.81328	2613667			3.81322	120333
3.81633	3980398			3.81683	1069068			3.8162	2592143			3.81613	126180
3.81923	3951312			3.81975	1058148			3.81912	2566589			3.81903	123227
3.82215	3969859			3.82265	1050032			3.82202	2554088			3.82195	126521
3.82507	3951550			3.82557	1036371			3.82493	2574867			3.82487	118657
3.82798	3942403			3.82848	1037373			3.82785	2576437			3.82778	119769
3.83088	3927464			3.8314	1017704			3.83077	2571274			3.8307	116060
3.8338	3922827			3.83432	980386			3.83367	2547841			3.8336	107779
3.83672	3895219			3.83722	965257			3.83658	2526054			3.83652	119228
3.83963	3893178			3.84013	957421			3.8395	2531330			3.83943	118204
3.84255	3887967			3.84305	941898			3.84242	2512510			3.84235	114780
3.84545	3879645			3.84597	959659			3.84532	2530312			3.84525	114615
3.84837	3863516			3.84888	946147			3.84823	2549101			3.84817	116970
3.85128	3874314			3.85178	944669			3.85115	2514322			3.85108	122517
3.8542	3855520			3.8547	924114			3.85407	2522398			3.854	114208
3.8571	3840117			3.85762	934480			3.85698	2526555			3.8569	106322
3.86002	3845792			3.86053	928160			3.85988	2549349			3.85982	102982
3.86293	3844469			3.86343	948476			3.8628	2544662			3.86273	100833
3.86585	3847972			3.86635	973768			3.86572	2535475			3.86565	99952.9
3.86875	3804108			3.86927	1009486			3.86863	2560500			3.86855	103341
3.87167	3823054			3.87218	1055479			3.87153	2566945			3.87147	103013
3.87458	3777394			3.8751	1042750			3.87445	2553594			3.87438	110814
3.8775	3764507			3.878	1052179			3.87737	2535113			3.8773	111034
3.88042	3749922			3.88092	1038821			3.88028	2499569			3.8802	110375
3.88332	3746063			3.88383	1040618			3.88318	2503503			3.88312	103073
3.88623	3727704			3.88675	1023129			3.8861	2499202			3.88603	101966
3.88915	3718370			3.88967	1075944			3.88902	2483000			3.88895	103693
3.89207	3723157			3.89257	1070312			3.89193	2470177			3.89187	103512
3.89497	3711678			3.89548	1014023			3.89483	2442690			3.89477	104046
3.89788	3692916			3.8984	984572			3.89775	2424323			3.89768	100408
3.9008	3688755			3.90132	995378			3.90067	2403886			3.9006	104373
3.90372	3669708			3.90423	1011259			3.90358	2386303			3.90352	109265
3.90662	3659654			3.90713	1001257			3.90648	2384887			3.90642	101916
3.90953	3649279			3.91005	957294			3.9094	2397488			3.90933	101876
3.91245	3638028			3.91297	956801			3.91232	2385478			3.91225	101359
3.91537	3627415			3.91588	948408			3.91523	2356654			3.91517	102801
3.91828	3636379			3.9188	927765			3.91815	2348496			3.91807	110530
3.92118	3628966			3.9217	975287			3.92105	2333871			3.92098	108913
3.9241	3600716			3.92462	887193			3.92397	2333405			3.9239	111245
3.92702	3554809			3.92753	893874			3.92688	2323603			3.92682	111029
3.92993	3491101			3.93045	877875			3.9298	2304105			3.92972	118087
3.93283	3516114			3.93335	862161			3.9327	2316017			3.93263	105658
3.93575	3540373			3.93627	852176			3.93562	2302963			3.93555	102443
3.93867	3562981			3.93918	866216			3.93853	2309176			3.93847	110465
3.94158	3556735			3.9421	844747			3.94145	2296293			3.94137	110554
3.94448	3532774			3.94502	809441			3.94435	2309603			3.94428	108810
3.9474	3511931			3.94792	785217			3.94727	2295886			3.9472	100650
3.95032	3490178			3.95083	762923			3.95018	2280161			3.95012	98121.8
3.95323	3506137			3.95375	794126			3.9531	2261977			3.95302	98690.8
3.95615	3463891			3.95667	791637			3.956	2270425			3.95593	101712
3.95905	3460200			3.95958	810783			3.95892	2254514			3.95885	102477
3.96197	3445585			3.96248	799062			3.96183	2236572			3.96177	103690
3.96488	3416315			3.9654	765372			3.96475	2221818			3.96467	102876
3.9678	3395371			3.96832	759902			3.96765	2228352			3.96758	109654
3.9707	3385127			3.97123	769586			3.97057	2241804			3.9705	107638
3.97362	3384935			3.97415	742327			3.97348	2257346			3.97342	102318
3.97653	3373236			3.97705	744260			3.9764	2230918			3.97633	103513
3.97945	3387911			3.97997	738611			3.9793	2210625			3.97923	96153.8
3.98235	3401853			3.98288	730821			3.98222	2212381			3.98215	100978
3.98527	3392550			3.9858	693493			3.98513	2234307			3.98507	106592
3.98818	3380240			3.98872	696242			3.98805	2227127			3.98798	105307
3.9911	3385338			3.99162	681435			3.99097	2224899			3.99088	105314
3.99402	3369855			3.99453	690332			3.99387	2203343			3.9938	102663
3.99692	3368584			3.99745	681007			3.99678	2226777			3.99672	111636
3.99983	3360221			4.00037	697062			3.9997	2213998			3.99963	99675
4.00275	3362971			4.00327	700260			4.00262	2196716			4.00253	100222
4.00567	3334036			4.00618	670736			4.00552	2172326			4.00545	98893.4
4.00857	3335819			4.0091	673725			4.00843	2176745			4.00837	99550
4.01148	3323025			4.01202	685829			4.01135	2215440			4.01128	108616
4.0144	3347211			4.01493	705723			4.01427	2239528			4.01418	98321.6
4.01732	3334619			4.01783	746500			4.01717	2225194			4.0171	98439.8
4.02023	3295610			4.02075	762077			4.02008	2169246			4.02002	94248.5
4.02313	3258901			4.02367	794201			4.023	2138745			4.02293	97736.5
4.02605	3294212			4.02658	836239			4.02592	2148147			4.02583	96851.2
4.02897	3292220			4.0295	862210			4.02882	2169614			4.02875	96240.3
4.03188	3311567			4.0324	870111			4.03173	2166381			4.03167	96935.8
4.03478	3300564			4.03532	862588			4.03465	2158544			4.03458	91071.2
4.0377	3280129			4.03823	860855			4.03757	2153394			4.0375	99809.3
4.04062	3229507			4.04115	848075			4.04048	2133275			4.0404	99225.3
4.04353	3217690			4.04407	825252			4.04338	2140677			4.04332	98181.1
4.04645	3250631			4.04697	820119			4.0463	2128235			4.04623	93412.7
4.04935	3229754			4.04988	844442			4.04922	2112581			4.04915	95129.1
4.05227	3210480			4.0528	836390			4.05213	2091910			4.05205	88467.7
4.05518	3198864			4.05572	817206			4.05503	2086309			4.05497	91111.7
4.0581	3203442			4.05862	749437			4.05795	2109489			4.05788	95187.3
4.061	3197427			4.06153	765157			4.06087	2118097			4.0608	98215.1
4.06392	3194453			4.06445	742355			4.06378	2105849			4.0637	101325
4.06683	3198349			4.06737	738051			4.06668	2085039			4.06662	104512
4.06975	3197219			4.07028	732898			4.0696	2084424			4.06953	101119
4.07265	3160692			4.0732	749601			4.07252	2075817			4.07245	95265.5
4.07557	3153967			4.0761	737939			4.07543	2051862			4.07535	98991.6
4.07848	3157973			4.07902	691706			4.07833	2057106			4.07827	100885
4.0814	3152062			4.08193	710258			4.08125	2058289			4.08118	101600
4.08432	3122671			4.08485	685453			4.08417	2056803			4.0841	102538
4.08722	3102432			4.08775	704405			4.08708	2044472			4.087	99518.6
4.09013	3114625			4.09067	682910			4.08998	2043355			4.08992	99949.2
4.09305	3141966			4.09358	714579			4.0929	2035144			4.09283	102918
4.09597	3118717			4.0965	717874			4.09582	2029304			4.09575	101464
4.09887	3097181			4.09942	713668			4.09873	2029011			4.09865	97878.4
4.10178	3105016			4.10232	662832			4.10165	2040709			4.10157	98625.2
4.1047	3097872			4.10523	659107			4.10455	2056312			4.10448	99827.7
4.10762	3109389			4.10815	662571			4.10747	2032528			4.1074	102117
4.11052	3101860			4.11107	655555			4.11038	2059372			4.1103	97587.5
4.11343	3083978			4.11398	642764			4.1133	2024920			4.11322	100975
4.11635	3051691			4.11688	642044			4.1162	2026110			4.11613	100274
4.11927	3042089			4.1198	646593			4.11912	2010734			4.11905	97047.8
4.12217	3055887			4.12272	630739			4.12203	2033626			4.12197	92675.8
4.12508	3088055			4.12563	611534			4.12495	2062294			4.12487	94249.4
4.128	3060495			4.12855	622457			4.12785	2103156			4.12778	93850.3
4.13092	3062815			4.13145	610995			4.13077	2142911			4.1307	90173.2
4.13383	3069495			4.13437	600001			4.13368	2148398			4.13362	88643.8
4.13673	3107133			4.13728	643554			4.1366	2188122			4.13652	94733.8
4.13965	3131216			4.1402	613034			4.1395	2232138			4.13943	112283
4.14257	3121703			4.14312	591329			4.14242	2253415			4.14235	144468
4.14548	3099898			4.14602	569834			4.14533	2223352			4.14527	181744
4.14838	3084214			4.14893	572191			4.14825	2209166			4.14817	257002
4.1513	3064167			4.15185	576480			4.15117	2220362			4.15108	355159
4.15422	3091448			4.15477	583173			4.15407	2201084			4.154	453925
4.15713	3074427			4.15768	618428			4.15698	2155901			4.15692	530844
4.16003	3059157			4.16058	646484			4.1599	2130515			4.15982	576080
4.16295	3021051			4.1635	683154			4.16282	2110358			4.16273	597926
4.16587	3005631			4.16642	711927			4.16572	2121896			4.16565	609836
4.16878	3020615			4.16933	707484			4.16863	2070235			4.16857	592869
4.1717	3031518			4.17223	693130			4.17155	2060481			4.17147	564405
4.1746	3020418			4.17515	710708			4.17447	2037962			4.17438	552616
4.17752	2991742			4.17807	718496			4.17737	2034447			4.1773	519199
4.18043	2957802			4.18098	697846			4.18028	2013581			4.18022	477659
4.18335	2935801			4.1839	696770			4.1832	1997624			4.18312	462540
4.18625	2943242			4.1868	665856			4.18612	1983000			4.18603	447360
4.18917	2925857			4.18972	652953			4.18902	1956709			4.18895	434187
4.19208	2911929			4.19263	635588			4.19193	1969789			4.19187	412074
4.195	2900119			4.19555	616218			4.19485	1955749			4.19477	395604
4.1979	2878916			4.19847	611615			4.19777	1979287			4.19768	373954
4.20082	2880923			4.20137	580910			4.20067	1981822			4.2006	357367
4.20373	2904803			4.20428	604058			4.20358	1983104			4.20352	353455
4.20665	2915365			4.2072	599891			4.2065	1970654			4.20643	350293
4.20957	2925738			4.21012	593869			4.20942	1936031			4.20933	331967
4.21247	2901622			4.21303	582898			4.21232	1919764			4.21225	314869
4.21538	2896783			4.21593	576027			4.21523	1920390			4.21517	320089
4.2183	2888575			4.21885	577174			4.21815	1923317			4.21808	314454
4.22122	2897340			4.22177	569030			4.22107	1909662			4.22098	304670
4.22412	2903069			4.22468	558785			4.22398	1894988			4.2239	284891
4.22703	2868988			4.2276	607574			4.22688	1922783			4.22682	277192
4.22995	2883625			4.2305	634275			4.2298	1908095			4.22973	277989
4.23287	2880716			4.23342	564144			4.23272	1876094			4.23263	275984
4.23577	2880863			4.23633	546756			4.23563	1861538			4.23555	270199
4.23868	2882812			4.23925	537010			4.23853	1860334			4.23847	256814
4.2416	2865039			4.24215	536314			4.24145	1871752			4.24138	253558
4.24452	2855141			4.24507	542186			4.24437	1859136			4.24428	248022
4.24742	2853670			4.24798	552647			4.24728	1862366			4.2472	248887
4.25033	2841193			4.2509	551242			4.25018	1859398			4.25012	247855
4.25325	2828207			4.25382	543371			4.2531	1863558			4.25303	248413
4.25617	2848163			4.25672	523772			4.25602	1870510			4.25593	241417
4.25908	2853281			4.25963	531962			4.25893	1861531			4.25885	245206
4.26198	2867340			4.26255	524326			4.26183	1869762			4.26177	240669
4.2649	2874309			4.26547	557732			4.26475	1864347			4.26468	239129
4.26782	2907715			4.26838	522054			4.26767	1884972			4.26758	235846
4.27073	2949163			4.27128	514913			4.27058	1933463			4.2705	248132
4.27363	3000217			4.2742	516253			4.27348	1954628			4.27342	264353
4.27655	3057221			4.27712	583182			4.2764	2009141			4.27633	265102
4.27947	3077983			4.28003	526888			4.27932	2040527			4.27923	278854
4.28238	3168446			4.28295	565879			4.28223	2073981			4.28215	290616
4.28528	3222899			4.28585	590884			4.28515	2088718			4.28507	317208
4.2882	3264058			4.28877	650706			4.28805	2116629			4.28798	349250
4.29112	3257866			4.29168	700355			4.29097	2132464			4.2909	367440
4.29403	3247175			4.2946	819504			4.29388	2126745			4.2938	390273
4.29695	3208086			4.29752	950897			4.2968	2090808			4.29672	402086
4.29985	3164766			4.30042	1150775			4.2997	2091990			4.29963	414427
4.30277	3130038			4.30333	1281502			4.30262	2055717			4.30255	408790
4.30568	3121007			4.30625	1461196			4.30553	2047519			4.30545	413277
4.3086	3108393			4.30917	1605315			4.30845	2018642			4.30837	416198
4.3115	3089717			4.31207	1701075			4.31135	2005777			4.31128	419815
4.31442	3062747			4.31498	1758979			4.31427	1982419			4.3142	418630
4.31733	3041799			4.3179	1726961			4.31718	1979776			4.3171	414588
4.32025	3008906			4.32082	1740472			4.3201	1955177			4.32002	401299
4.32315	2975724			4.32373	1717486			4.323	1952632			4.32293	402361
4.32607	2969280			4.32663	1716531			4.32592	1959811			4.32585	401803
4.32898	2956446			4.32955	1661968			4.32883	1927314			4.32877	393616
4.3319	2930664			4.33247	1611716			4.33175	1908242			4.33167	390589
4.33482	2935933			4.33538	1553573			4.33465	1903883			4.33458	392159
4.33772	2944751			4.3383	1474544			4.33757	1909535			4.3375	378784
4.34063	2935437			4.3412	1435586			4.34048	1916979			4.34042	380666
4.34355	2924372			4.34412	1425360			4.3434	1889054			4.34332	389774
4.34647	2898082			4.34703	1412767			4.3463	1885593			4.34623	390435
4.34937	2871617			4.34995	1393393			4.34922	1867050			4.34915	379233
4.35228	2844115			4.35287	1368424			4.35213	1874577			4.35207	374670
4.3552	2879994			4.35577	1327021			4.35505	1866454			4.35497	377010
4.35812	2883290			4.35868	1303894			4.35797	1852754			4.35788	374149
4.36102	2880863			4.3616	1287467			4.36087	1855156			4.3608	378286
4.36393	2833953			4.36452	1269467			4.36378	1843215			4.36372	377664
4.36685	2834134			4.36743	1254360			4.3667	1848209			4.36662	373434
4.36977	2832440			4.37033	1239252			4.36962	1829897			4.36953	361585
4.37268	2821450			4.37325	1199017			4.37252	1848650			4.37245	363994
4.37558	2804850			4.37617	1188226			4.37543	1854941			4.37537	364687
4.3785	2797301			4.37908	1181113			4.37835	1874881			4.37828	361682
4.38142	2786793			4.38198	1157403			4.38127	1846662			4.38118	363912
4.38433	2768260			4.3849	1187147			4.38417	1835583			4.3841	359972
4.38723	2747018			4.38782	1125113			4.38708	1803712			4.38702	357256
4.39015	2745919			4.39073	1142048			4.39	1810395			4.38993	340066
4.39307	2740804			4.39365	1113752			4.39292	1787475			4.39283	326948
4.39598	2743300			4.39655	1102168			4.39582	1798764			4.39575	315123
4.39888	2767008			4.39947	1084336			4.39873	1779298			4.39867	287239
4.4018	2762349			4.40238	1082941			4.40165	1771382			4.40158	247528
4.40472	2758534			4.4053	1056419			4.40457	1780829			4.40448	225705
4.40763	2739016			4.40822	1046300			4.40748	1770745			4.4074	193736
4.41055	2715557			4.41112	1057319			4.41038	1758085			4.41032	169769
4.41345	2717814			4.41403	1051339			4.4133	1757419			4.41323	147486
4.41637	2715059			4.41695	1051553			4.41622	1753884			4.41613	138774
4.41928	2723423			4.41987	1028073			4.41913	1739436			4.41905	129580
4.4222	2685092			4.42278	1035871			4.42203	1752843			4.42197	121366
4.4251	2678913			4.42568	1013346			4.42495	1756323			4.42488	123552
4.42802	2674128			4.4286	1010411			4.42787	1763012			4.4278	124310
4.43093	2690086			4.43152	1010908			4.43078	1725688			4.4307	118233
4.43385	2654714			4.43443	1001444			4.43368	1734902			4.43362	115961
4.43675	2659246			4.43735	994704			4.4366	1739289			4.43653	111166
4.43967	2642581			4.44025	956795			4.43952	1742833			4.43945	112744
4.44258	2645148			4.44317	967457			4.44243	1723525			4.44235	112151
4.4455	2682689			4.44608	970605			4.44533	1737156			4.44527	109034
4.44842	2671114			4.449	949963			4.44825	1718369			4.44818	108882
4.45132	2683123			4.4519	956072			4.45117	1708192			4.4511	111267
4.45423	2648326			4.45482	935355			4.45408	1701527			4.454	113098
4.45715	2661500			4.45773	933284			4.457	1697491			4.45692	116998
4.46007	2642142			4.46065	956490			4.4599	1686352			4.45983	117016
4.46297	2648314			4.46357	964464			4.46282	1688814			4.46275	115644
4.46588	2610995			4.46647	927404			4.46573	1704115			4.46565	117280
4.4688	2604126			4.46938	916337			4.46865	1686789			4.46857	116386
4.47172	2592284			4.4723	912889			4.47155	1692798			4.47148	117098
4.47463	2613418			4.47522	940512			4.47447	1687122			4.4744	112532
4.47753	2611189			4.47813	947373			4.47738	1679104			4.4773	112875
4.48045	2607564			4.48103	944202			4.4803	1654107			4.48022	104910
4.48337	2586235			4.48395	945840			4.4832	1670416			4.48313	107208
4.48628	2560039			4.48687	940651			4.48612	1651064			4.48605	111148
4.48918	2535749			4.48978	949414			4.48903	1673309			4.48897	105091
4.4921	2536092			4.4927	935744			4.49195	1666837			4.49187	106760
4.49502	2541603			4.4956	968081			4.49485	1666954			4.49478	110482
4.49793	2536441			4.49852	958714			4.49777	1648734			4.4977	107522
4.50085	2551972			4.50143	961005			4.50068	1630367			4.50062	107239
4.50375	2566289			4.50435	969942			4.5036	1625227			4.50352	112466
4.50667	2564862			4.50727	951143			4.50652	1609996			4.50643	104514
4.50958	2546701			4.51017	929366			4.50942	1619519			4.50935	108346
4.5125	2526120			4.51308	948476			4.51233	1624456			4.51227	108182
4.5154	2528006			4.516	958642			4.51525	1599339			4.51517	105592
4.51832	2498814			4.51892	913178			4.51817	1574212			4.51808	106605
4.52123	2519621			4.52182	889426			4.52107	1582213			4.521	107855
4.52415	2498569			4.52473	927318			4.52398	1602383			4.52392	102145
4.52705	2508644			4.52765	976680			4.5269	1591542			4.52682	98533.2
4.52997	2485857			4.53057	942734			4.52982	1566320			4.52973	104183
4.53288	2476854			4.53348	942781			4.53272	1579258			4.53265	109204
4.5358	2466632			4.53638	923707			4.53563	1583609			4.53557	116137
4.5387	2478667			4.5393	911946			4.53855	1588501			4.53847	110991
4.54162	2484093			4.54222	919287			4.54147	1566527			4.54138	118353
4.54453	2468026			4.54513	909555			4.54437	1568076			4.5443	115373
4.54745	2463420			4.54805	896791			4.54728	1561114			4.54722	109585
4.55037	2478326			4.55095	896021			4.5502	1548457			4.55012	102424
4.55327	2509657			4.55387	903686			4.55312	1535875			4.55303	109620
4.55618	2468929			4.55678	917770			4.55602	1534758			4.55595	101406
4.5591	2441827			4.5597	888310			4.55893	1540717			4.55887	102801
4.56202	2425834			4.56262	928265			4.56185	1533866			4.56178	113613
4.56492	2426649			4.56552	902861			4.56477	1525744			4.56468	115836
4.56783	2437301			4.56843	891213			4.56768	1521251			4.5676	110243
4.57075	2426763			4.57135	861030			4.57058	1526766			4.57052	104561
4.57367	2446602			4.57427	857876			4.5735	1509903			4.57343	99717
4.57657	2447321			4.57718	857845			4.57642	1535402			4.57633	104536
4.57948	2452239			4.58008	862425			4.57933	1538594			4.57925	105984
4.5824	2422911			4.583	850130			4.58223	1519879			4.58217	106958
4.58532	2388766			4.58592	866834			4.58515	1502608			4.58508	102463
4.58823	2359028			4.58883	842818			4.58807	1488769			4.58798	103942
4.59113	2344466			4.59173	847762			4.59098	1476358			4.5909	101115
4.59405	2363098			4.59465	834377			4.59388	1467189			4.59382	99654.5
4.59697	2388766			4.59757	832033			4.5968	1464316			4.59673	107128
4.59988	2362626			4.60048	824942			4.59972	1482298			4.59963	109189
4.60278	2368420			4.6034	839471			4.60263	1476102			4.60255	101865
4.6057	2379489			4.6063	834979			4.60553	1471451			4.60547	99486.5
4.60862	2382476			4.60922	825667			4.60845	1461012			4.60838	103914
4.61153	2363689			4.61213	839853			4.61137	1455524			4.61128	105301
4.61443	2336810			4.61505	830513			4.61428	1450531			4.6142	103065
4.61735	2320346			4.61797	802563			4.61718	1441141			4.61712	100354
4.62027	2308856			4.62087	805192			4.6201	1457764			4.62003	104395
4.62318	2304755			4.62378	836176			4.62302	1442279			4.62293	106846
4.62608	2311503			4.6267	805101			4.62593	1444891			4.62585	102734
4.629	2313872			4.62962	801463			4.62885	1434182			4.62877	107300
4.63192	2280837			4.63253	805048			4.63175	1447871			4.63168	106786
4.63483	2246392			4.63543	804872			4.63467	1423134			4.6346	100472
4.63775	2238450			4.63835	835880			4.63758	1406071			4.6375	98573.1
4.64065	2257726			4.64127	809781			4.6405	1400963			4.64042	111403
4.64357	2270471			4.64418	797468			4.6434	1385247			4.64333	111587
4.64648	2263093			4.6471	779875			4.64632	1383213			4.64625	109305
4.6494	2255874			4.65	807613			4.64923	1391374			4.64915	110674
4.6523	2259045			4.65292	782836			4.65215	1397735			4.65207	111270
4.65522	2255240			4.65583	782804			4.65505	1407093			4.65498	112075
4.65813	2244945			4.65875	779980			4.65797	1378859			4.6579	114441
4.66105	2186924			4.66167	798040			4.66088	1381616			4.6608	108903
4.66395	2209978			4.66457	817806			4.6638	1348849			4.66372	104462
4.66687	2202986			4.66748	809829			4.66672	1347967			4.66663	110425
4.66978	2195855			4.6704	763594			4.66962	1352725			4.66955	114688
4.6727	2185785			4.67332	739822			4.67253	1343848			4.67245	117694
4.67562	2167695			4.67622	758136			4.67545	1333994			4.67537	110002
4.67852	2164587			4.67913	765803			4.67837	1342023			4.67828	106248
4.68143	2142433			4.68205	771634			4.68127	1330838			4.6812	99923.3
4.68435	2137106			4.68497	785100			4.68418	1324125			4.6841	104123
4.68727	2150194			4.68788	773738			4.6871	1309500			4.68702	105525
4.69017	2176773			4.69078	770894			4.69002	1304733			4.68993	102568
4.69308	2187999			4.6937	736146			4.69292	1306308			4.69285	100516
4.696	2160236			4.69662	738580			4.69583	1299513			4.69575	109342
4.69892	2141276			4.69953	750464			4.69875	1304367			4.69867	103346
4.70182	2119746			4.70245	782572			4.70167	1306515			4.70158	103384
4.70473	2103333			4.70535	775806			4.70457	1295020			4.7045	102482
4.70765	2097962			4.70827	778959			4.70748	1273050			4.70742	110695
4.71057	2106434			4.71118	766777			4.7104	1281060			4.71032	109096
4.71347	2137648			4.7141	767665			4.71332	1297330			4.71323	102505
4.71638	2123522			4.71702	755151			4.71622	1286688			4.71615	102649
4.7193	2119431			4.71992	749902			4.71913	1292459			4.71907	103169
4.72222	2084119			4.72283	732908			4.72205	1285847			4.72197	102716
4.72512	2078104			4.72575	731172			4.72497	1291019			4.72488	105700
4.72803	2071103			4.72867	735741			4.72788	1281375			4.7278	106916
4.73095	2083448			4.73158	713688			4.73078	1265112			4.73072	110291
4.73387	2077320			4.73448	711518			4.7337	1279463			4.73362	111331
4.73678	2044036			4.7374	722659			4.73662	1297569			4.73653	109678
4.73968	2026459			4.74032	726987			4.73953	1307063			4.73945	112554
4.7426	2025029			4.74323	724287			4.74243	1298598			4.74237	115141
4.74552	2048972			4.74613	742319			4.74535	1294575			4.74527	123019
4.74843	2046966			4.74905	734965			4.74827	1301676			4.74818	128537
4.75133	2052739			4.75197	706648			4.75118	1321162			4.7511	133626
4.75425	2034352			4.75488	698954			4.75408	1327997			4.75402	143312
4.75717	1997649			4.7578	686917			4.757	1326625			4.75692	152219
4.76008	2041653			4.7607	698231			4.75992	1316099			4.75983	160688
4.76298	2022944			4.76362	718651			4.76283	1348309			4.76275	164802
4.7659	2005202			4.76653	723760			4.76573	1338445			4.76567	169738
4.76882	1985497			4.76945	752946			4.76865	1354220			4.76857	176341
4.77173	1992290			4.77237	730762			4.77157	1355592			4.77148	176404
4.77465	1982465			4.77527	767682			4.77448	1352855			4.7744	181788
4.77755	1969684			4.77818	787524			4.77738	1355779			4.77732	196522
4.78047	1975371			4.7811	864708			4.7803	1353338			4.78022	202572
4.78338	1978269			4.78402	886160			4.78322	1343845			4.78313	215167
4.7863	1972473			4.78693	849130			4.78613	1354071			4.78605	214107
4.7892	1949467			4.78983	869652			4.78905	1361728			4.78897	229481
4.79212	1943505			4.79275	857025			4.79195	1352882			4.79188	229341
4.79503	1939791			4.79567	891161			4.79487	1373462			4.79478	227290
4.79795	1929432			4.79858	940397			4.79778	1382700			4.7977	231035
4.80085	1882155			4.8015	951226			4.8007	1391862			4.80062	227480
4.80377	1869756			4.8044	951248			4.8036	1412580			4.80353	242190
4.80668	1885121			4.80732	915932			4.80652	1409225			4.80643	265078
4.8096	1896553			4.81023	930345			4.80943	1412389			4.80935	270221
4.81252	1871029			4.81315	924192			4.81235	1416786			4.81227	283095
4.81542	1869573			4.81607	860159			4.81525	1395042			4.81518	283162
4.81833	1842854			4.81897	850864			4.81817	1390264			4.81808	280380
4.82125	1833368			4.82188	817165			4.82108	1388541			4.821	289751
4.82417	1836829			4.8248	774697			4.824	1422098			4.82392	304035
4.82707	1845727			4.82772	740241			4.8269	1446880			4.82683	322784
4.82998	1869956			4.83062	711062			4.82982	1445062			4.82973	337385
4.8329	1853413			4.83353	669463			4.83273	1448627			4.83265	345978
4.83582	1850895			4.83645	649584			4.83565	1458112			4.83557	336292
4.83872	1835299			4.83937	590218			4.83857	1459562			4.83848	341499
4.84163	1847833			4.84228	545636			4.84147	1475224			4.84138	358408
4.84455	1837238			4.84518	540690			4.84438	1501374			4.8443	363076
4.84747	1832300			4.8481	541493			4.8473	1506572			4.84722	383429
4.85037	1819551			4.85102	541219			4.85022	1505023			4.85013	389783
4.85328	1762004			4.85393	534853			4.85312	1513297			4.85305	406919
4.8562	1676156			4.85685	508179			4.85603	1500584			4.85595	416289
4.85912	1578097			4.85975	518586			4.85895	1510378			4.85887	425781
4.86202	1518798			4.86267	515600			4.86187	1532502			4.86178	434299
4.86493	1480267			4.86558	499923			4.86477	1533335			4.8647	438940
4.86785	1460874			4.8685	498651			4.86768	1552708			4.8676	453663
4.87077	1430876			4.87142	490779			4.8706	1579955			4.87052	460970
4.87368	1428830			4.87432	479562			4.87352	1593713			4.87343	466172
4.87658	1431059			4.87723	474827			4.87642	1603070			4.87635	479861
4.8795	1415090			4.88015	507624			4.87933	1617994			4.87925	490881
4.88242	1379487			4.88307	507139			4.88225	1631606			4.88217	502842
4.88533	1343886			4.88598	490415			4.88517	1652160			4.88508	499162
4.88823	1339669			4.88888	491106			4.88807	1665735			4.888	513562
4.89115	1365007			4.8918	472188			4.89098	1671406			4.8909	546292
4.89407	1381161			4.89472	465852			4.8939	1701908			4.89382	570137
4.89698	1373784			4.89763	465177			4.89682	1718575			4.89673	585843
4.89988	1350376			4.90055	467598			4.89973	1717242			4.89965	600766
4.9028	1350038			4.90345	462190			4.90263	1726942			4.90255	604776
4.90572	1325263			4.90637	456332			4.90555	1718735			4.90547	622073
4.90863	1341599			4.90928	451521			4.90847	1726852			4.90838	628521
4.91153	1340768			4.9122	447189			4.91138	1732217			4.9113	639076
4.91445	1334858			4.9151	425489			4.91428	1755802			4.9142	647436
4.91737	1308606			4.91802	420288			4.9172	1808208			4.91712	651600
4.92028	1301226			4.92093	438101			4.92012	1819330			4.92003	675850
4.9232	1302705			4.92385	461052			4.92303	1833364			4.92295	703807
4.9261	1312523			4.92677	450658			4.92593	1831002			4.92587	725814
4.92902	1307166			4.92967	441554			4.92885	1823854			4.92877	675203
4.93193	1295225			4.93258	448200			4.93177	1827587			4.93168	529481
4.93485	1275768			4.9355	431006			4.93468	1866058			4.9346	355002
4.93775	1253913			4.93842	432391			4.93758	1867327			4.93752	248983
4.94067	1243998			4.94133	429788			4.9405	1864334			4.94042	223043
4.94358	1240933			4.94423	413982			4.94342	1891251			4.94333	210215
4.9465	1250642			4.94715	434020			4.94633	1909335			4.94625	202356
4.9494	1261109			4.95007	419697			4.94923	1893066			4.94917	196178
4.95232	1248752			4.95298	417207			4.95215	1919138			4.95207	187936
4.95523	1241254			4.9559	400370			4.95507	1928961			4.95498	181447
4.95815	1226736			4.9588	405599			4.95798	1994004			4.9579	175246
4.96105	1230025			4.96172	412337			4.9609	2030258			4.96082	175192
4.96397	1234085			4.96463	421229			4.9638	2080181			4.96372	165943
4.96688	1225358			4.96755	427378			4.96672	2086086			4.96663	169762
4.9698	1202621			4.97045	413878			4.96963	2116984			4.96955	165604
4.9727	1200783			4.97337	403766			4.97255	2149800			4.97247	162702
4.97562	1203464			4.97628	395304			4.97545	2156782			4.97537	154353
4.97853	1224995			4.9792	412713			4.97837	2173621			4.97828	155794
4.98145	1214534			4.98212	426830			4.98128	2185654			4.9812	161277
4.98437	1216276			4.98502	417214			4.9842	2183915			4.98412	160126
4.98727	1204092			4.98793	402182			4.9871	2182294			4.98702	167250
4.99018	1202381			4.99085	415722			4.99002	2186315			4.98993	168587
4.9931	1187355			4.99377	431399			4.99293	2176233			4.99285	161551
4.99602	1208197			4.99668	422355			4.99585	2181087			4.99577	156572
4.99892	1200188			4.99958	424180			4.99875	2208984			4.99868	160642
5.00183	1194028			5.0025	437137			5.00167	2194925			5.00158	163690
5.00475	1171488			5.00542	455433			5.00458	2202216			5.0045	153360
5.00767	1147797			5.00833	446457			5.0075	2250801			5.00742	147410
5.01057	1124393			5.01125	474566			5.0104	2279850			5.01033	148106
5.01348	1112641			5.01415	492626			5.01332	2287351			5.01323	154947
5.0164	1127523			5.01707	531963			5.01623	2278660			5.01615	151327
5.01932	1120617			5.01998	543388			5.01915	2277236			5.01907	145161
5.02222	1111906			5.0229	543829			5.02205	2298776			5.02198	141870
5.02513	1078872			5.02582	567909			5.02497	2324412			5.02488	146450
5.02805	1089231			5.02872	637272			5.02788	2334614			5.0278	149621
5.03097	1078088			5.03163	680703			5.0308	2331169			5.03072	158021
5.03388	1079172			5.03455	713749			5.03372	2345309			5.03363	175283
5.03678	1058085			5.03747	705655			5.03662	2397502			5.03653	167576
5.0397	1059111			5.04037	721485			5.03953	2434728			5.03945	178769
5.04262	1053995			5.04328	743183			5.04245	2445372			5.04237	179416
5.04553	1058920			5.0462	758572			5.04537	2433128			5.04528	185121
5.04843	1058623			5.04912	761266			5.04827	2429409			5.04818	193110
5.05135	1051296			5.05203	779757			5.05118	2460282			5.0511	220958
5.05427	1036069			5.05493	781562			5.0541	2499268			5.05402	221615
5.05718	1034699			5.05785	736551			5.05702	2533775			5.05693	228821
5.06008	1024392			5.06077	731762			5.05992	2536176			5.05983	241855
5.063	1005512			5.06368	723780			5.06283	2542879			5.06275	255978
5.06592	1020591			5.0666	716665			5.06575	2548030			5.06567	267630
5.06883	1009865			5.0695	659877			5.06867	2566984			5.06858	271866
5.07175	1001554			5.07242	648002			5.07157	2606522			5.0715	265734
5.07465	994583			5.07533	681905			5.07448	2638725			5.0744	286239
5.07757	1016584			5.07825	701403			5.0774	2690081			5.07732	268080
5.08048	1024576			5.08117	670248			5.08032	2699659			5.08023	253925
5.0834	1030097			5.08407	598073			5.08323	2723649			5.08315	219122
5.0863	1071564			5.08698	596225			5.08613	2718813			5.08605	203024
5.08922	1121298			5.0899	591485			5.08905	2809283			5.08897	193739
5.09213	1187749			5.09282	602244			5.09197	2901783			5.09188	198685
5.09505	1270584			5.09573	583533			5.09488	2993253			5.0948	221279
5.09795	1345248			5.09863	586822			5.09778	3103708			5.0977	244225
5.10087	1420273			5.10155	588705			5.1007	3164423			5.10062	275106
5.10378	1468286			5.10447	622692			5.10362	3229257			5.10353	319050
5.1067	1478188			5.10738	608431			5.10653	3293858			5.10645	392460
5.1096	1511917			5.1103	641125			5.10943	3320148			5.10935	437371
5.11252	1494914			5.1132	700810			5.11235	3327134			5.11227	474044
5.11543	1464755			5.11612	818285			5.11527	3330449			5.11518	500481
5.11835	1418545			5.11903	971454			5.11818	3301224			5.1181	514145
5.12125	1397904			5.12195	1155364			5.12108	3255863			5.121	530745
5.12417	1362916			5.12485	1327282			5.124	3280663			5.12392	539935
5.12708	1314408			5.12777	1525480			5.12692	3238283			5.12683	510111
5.13	1268479			5.13068	1708557			5.12983	3278769			5.12975	490361
5.1329	1251327			5.1336	1805857			5.13275	3303088			5.13265	462523
5.13582	1224461			5.13652	1908533			5.13565	3287095			5.13557	463180
5.13873	1209777			5.13942	1919280			5.13857	3277860			5.13848	437627
5.14165	1184004			5.14233	1918858			5.14148	3252656			5.1414	424222
5.14457	1164873			5.14525	1835400			5.1444	3284268			5.14432	384278
5.14747	1150945			5.14817	1752527			5.1473	3280734			5.14722	360530
5.15038	1121289			5.15108	1699170			5.15022	3275933			5.15013	344793
5.1533	1122980			5.15398	1604449			5.15313	3266549			5.15305	340353
5.15622	1100407			5.1569	1444388			5.15605	3285211			5.15597	337364
5.15912	1102324			5.15982	1346543			5.15895	3291940			5.15887	338756
5.16203	1055522			5.16273	1308985			5.16187	3315926			5.16178	333536
5.16495	1059388			5.16565	1246279			5.16478	3353605			5.1647	311318
5.16787	1035090			5.16855	1198440			5.1677	3397692			5.16762	308784
5.17077	1035662			5.17147	1165042			5.1706	3393947			5.17052	289413
5.17368	1021593			5.17438	1112531			5.17352	3360151			5.17343	292743
5.1766	1013274			5.1773	1066994			5.17643	3343301			5.17635	281845
5.17952	999710			5.18022	1043316			5.17935	3371186			5.17927	269878
5.18242	984151			5.18312	1053155			5.18225	3356178			5.18217	256847
5.18533	983806			5.18603	1015870			5.18517	3374618			5.18508	259075
5.18825	984941			5.18895	997735			5.18808	3355693			5.188	258576
5.19117	976597			5.19187	965869			5.191	3392488			5.19092	251473
5.19407	985460			5.19477	952534			5.19392	3462278			5.19382	241120
5.19698	976072			5.19768	890709			5.19682	3451173			5.19673	235561
5.1999	985109			5.2006	876486			5.19973	3452014			5.19965	230640
5.20282	963021			5.20352	853287			5.20265	3424995			5.20257	223161
5.20573	955463			5.20643	862977			5.20557	3457208			5.20547	206824
5.20863	949462			5.20933	868104			5.20847	3488915			5.20838	191197
5.21155	942329			5.21225	854478			5.21138	3505654			5.2113	176289
5.21447	936738			5.21517	802072			5.2143	3524785			5.21422	184190
5.21738	927663			5.21808	813446			5.21722	3511930			5.21713	170260
5.22028	931988			5.221	822653			5.22012	3490351			5.22003	169464
5.2232	927263			5.2239	826373			5.22303	3475252			5.22295	151794
5.22612	911674			5.22682	785114			5.22595	2901386			5.22587	149766
5.22903	910628			5.22973	754672			5.22887	2131482			5.22878	143922
5.23193	896901			5.23265	733210			5.23177	1400700			5.23168	141362
5.23485	887213			5.23557	752868			5.23468	1225988			5.2346	132453
5.23777	894261			5.23847	736573			5.2376	1136067			5.23752	132889
5.24068	885463			5.24138	716518			5.24052	1061088			5.24043	127788
5.24358	879159			5.2443	709090			5.24342	990441			5.24333	124087
5.2465	890136			5.24722	711910			5.24633	964561			5.24625	125461
5.24942	890288			5.25013	706709			5.24925	945877			5.24917	135049
5.25233	890823			5.25303	682900			5.25217	976892			5.25208	137597
5.25523	875002			5.25595	667543			5.25508	971848			5.25498	140108
5.25815	870725			5.25887	673530			5.25798	965929			5.2579	133317
5.26107	887632			5.26178	674457			5.2609	959979			5.26082	125368
5.26398	908440			5.26468	659977			5.26382	928738			5.26373	121365
5.26688	930204			5.2676	634298			5.26673	907020			5.26663	128455
5.2698	949570			5.27052	652817			5.26963	871875			5.26955	131189
5.27272	988902			5.27343	633997			5.27255	877694			5.27247	137342
5.27563	1041063			5.27635	641131			5.27547	889059			5.27538	150061
5.27855	1073534			5.27925	647018			5.27838	893749			5.2783	163546
5.28145	1142295			5.28217	631761			5.28128	918778			5.2812	171482
5.28437	1191731			5.28508	620488			5.2842	957902			5.28412	180088
5.28728	1248941			5.288	619328			5.28712	978151			5.28703	209784
5.2902	1246463			5.29092	630452			5.29003	999308			5.28995	224464
5.2931	1271409			5.29382	648381			5.29293	981821			5.29285	237511
5.29602	1296139			5.29673	639150			5.29585	959809			5.29577	262498
5.29893	1287456			5.29965	674781			5.29877	953535			5.29868	286521
5.30185	1244237			5.30257	733700			5.30168	961186			5.3016	290451
5.30475	1218092			5.30548	810226			5.30458	929342			5.3045	282584
5.30767	1205547			5.30838	873518			5.3075	914893			5.30742	284551
5.31058	1195693			5.3113	988334			5.31042	888953			5.31033	287934
5.3135	1182261			5.31422	1021118			5.31333	868596			5.31325	280631
5.3164	1135584			5.31713	1064511			5.31623	848985			5.31615	277102
5.31932	1100940			5.32005	1064421			5.31915	826634			5.31907	274875
5.32223	1096832			5.32295	1120906			5.32207	793057			5.32198	262619
5.32515	1082199			5.32587	1179395			5.32498	785976			5.3249	252357
5.32805	1084556			5.32878	1191898			5.3279	763416			5.3278	243041
5.33097	1058385			5.3317	1201390			5.3308	754566			5.33072	244666
5.33388	1029780			5.3346	1195845			5.33372	745328			5.33363	234232
5.3368	1007610			5.33752	1242649			5.33663	725059			5.33655	217599
5.3397	998854			5.34043	1275610			5.33955	717026			5.33945	216063
5.34262	972294			5.34335	1326116			5.34245	713503			5.34237	209454
5.34553	964330			5.34627	1353096			5.34537	702972			5.34528	199477
5.34845	951414			5.34917	1351654			5.34828	691737			5.3482	198444
5.35137	954818			5.35208	1352135			5.3512	678779			5.35112	197575
5.35427	952371			5.355	1275366			5.3541	656427			5.35402	192195
5.35718	935897			5.35792	1199553			5.35702	643786			5.35693	193572
5.3601	942296			5.36083	1157773			5.35993	642157			5.35985	189643
5.36302	944648			5.36373	1168863			5.36285	626323			5.36277	178915
5.36592	920185			5.36665	1110564			5.36575	632667			5.36567	179855
5.36883	889570			5.36957	1039477			5.36867	631773			5.36858	175889
5.37175	881326			5.37248	1004547			5.37158	631075			5.3715	170190
5.37467	875435			5.3754	1002251			5.3745	620711			5.37442	165698
5.37757	878247			5.3783	1006240			5.3774	609751			5.37732	164972
5.38048	868968			5.38122	964002			5.38032	606228			5.38023	157223
5.3834	865216			5.38413	995045			5.38323	595108			5.38315	166104
5.38632	871888			5.38705	972346			5.38615	587223			5.38607	157663
5.38922	876439			5.38995	925989			5.38905	579903			5.38897	147677
5.39213	881117			5.39287	917036			5.39197	573916			5.39188	138103
5.39505	875749			5.39578	887901			5.39488	577991			5.3948	140287
5.39797	850985			5.3987	863711			5.3978	591689			5.39772	133466
5.40087	861980			5.40162	837944			5.40072	574354			5.40062	138748
5.40378	863347			5.40452	861749			5.40362	588789			5.40353	139695
5.4067	868084			5.40743	845846			5.40653	566839			5.40645	130889
5.40962	848008			5.41035	809011			5.40945	556163			5.40937	122391
5.41253	815280			5.41327	800886			5.41237	545630			5.41227	119360
5.41543	828028			5.41618	816417			5.41527	540829			5.41518	117331
5.41835	825053			5.41908	802582			5.41818	540973			5.4181	125980
5.42127	838023			5.422	842912			5.4211	528852			5.42102	126439
5.42418	832973			5.42492	854589			5.42402	529431			5.42393	120105
5.42708	824222			5.42783	890918			5.42692	522090			5.42683	116509
5.43	821019			5.43075	930437			5.42983	518607			5.42975	115242
5.43292	805020			5.43365	927501			5.43275	509935			5.43267	112892
5.43583	799458			5.43657	948829			5.43567	512548			5.43558	112972
5.43873	791830			5.43948	928023			5.43857	521398			5.43848	112694
5.44165	794011			5.4424	907090			5.44148	519775			5.4414	111408
5.44457	797211			5.44532	892056			5.4444	510407			5.44432	108615
5.44748	792262			5.44822	874919			5.44732	505382			5.44723	108179
5.45038	778452			5.45113	890058			5.45022	491636			5.45013	109825
5.4533	777341			5.45405	851005			5.45313	489540			5.45305	112722
5.45622	779836			5.45697	842631			5.45605	484287			5.45597	111758
5.45913	788284			5.45987	831218			5.45897	480340			5.45888	110540
5.46203	779041			5.46278	813422			5.46187	475179			5.46178	106086
5.46495	776919			5.4657	759474			5.46478	471822			5.4647	108749
5.46787	780453			5.46862	739449			5.4677	475482			5.46762	109951
5.47078	762521			5.47153	712720			5.47062	467638			5.47053	109459
5.47368	772002			5.47443	706640			5.47352	462026			5.47343	106990
5.4766	782435			5.47735	720260			5.47643	464700			5.47635	105766
5.47952	805870			5.48027	688062			5.47935	471306			5.47927	112399
5.48243	818925			5.48318	700855			5.48227	476265			5.48218	111480
5.48535	883349			5.4861	696722			5.48518	521181			5.48508	108694
5.48825	1033391			5.489	708240			5.48808	611948			5.488	109322
5.49117	1359580			5.49192	698062			5.491	835550			5.49092	108265
5.49408	1983265			5.49483	654879			5.49392	1219931			5.49383	107786
5.497	2991663			5.49775	646734			5.49683	1880328			5.49675	116356
5.4999	4351456			5.50067	608243			5.49973	2793633			5.49965	104661
5.50282	5887637			5.50357	633143			5.50265	3936292			5.50257	104803
5.50573	7434544			5.50648	614675			5.50557	5166689			5.50548	100500
5.50865	8696204			5.5094	614863			5.50848	6297664			5.5084	101707
5.51155	9482771			5.51232	615113			5.51138	7137437			5.5113	105135
5.51447	9892354			5.51523	595056			5.5143	7606319			5.51422	107258
5.51738	9874765			5.51813	591965			5.51722	7697950			5.51713	108497
5.5203	9703361			5.52105	578691			5.52013	7560893			5.52005	119602
5.5232	9235979			5.52397	575941			5.52303	7230749			5.52295	117971
5.52612	8651923			5.52688	585340			5.52595	6846856			5.52587	118502
5.52903	7993693			5.52978	584312			5.52887	6435748			5.52878	125772
5.53195	7391603			5.5327	595311			5.53178	6048289			5.5317	146357
5.53485	6848447			5.53562	664186			5.53468	5649376			5.5346	167370
5.53777	6387448			5.53853	616368			5.5376	5293602			5.53752	184555
5.54068	5989170			5.54145	654246			5.54052	4930157			5.54043	216666
5.5436	5667900			5.54435	713564			5.54343	4636979			5.54335	241306
5.5465	5358771			5.54727	788026			5.54633	4379920			5.54625	268926
5.54942	5090580			5.55018	863006			5.54925	4111310			5.54917	264434
5.55233	4832356			5.5531	973419			5.55217	3961824			5.55208	264453
5.55525	4616252			5.55602	1062339			5.55508	3778250			5.555	269436
5.55815	4435426			5.55892	1116813			5.558	3617792			5.5579	263406
5.56107	4244273			5.56183	1140475			5.5609	3417977			5.56082	252579
5.56398	4067857			5.56475	1189767			5.56382	3301585			5.56373	252650
5.5669	3907597			5.56767	1201747			5.56673	3198108			5.56665	249170
5.56982	3775756			5.57058	1141983			5.56965	3110528			5.56955	240247
5.57272	3662192			5.57348	1116286			5.57255	3009318			5.57247	227961
5.57563	3590316			5.5764	1073396			5.57547	2909709			5.57538	225656
5.57855	3519530			5.57932	1073241			5.57838	2835514			5.5783	226076
5.58147	3388414			5.58223	1000134			5.5813	2723367			5.58122	213096
5.58437	3280372			5.58515	938842			5.5842	2635855			5.58412	190733
5.58728	3174540			5.58805	947219			5.58712	2563018			5.58703	191268
5.5902	3084834			5.59097	901109			5.59003	2492075			5.58995	189606
5.59312	3026422			5.59388	871537			5.59295	2427997			5.59287	189609
5.59602	2948502			5.5968	823574			5.59585	2335977			5.59577	182604
5.59893	2882370			5.5997	804455			5.59877	2277148			5.59868	179134
5.60185	2813378			5.60262	793021			5.60168	2196856			5.6016	178927
5.60477	2742666			5.60553	768848			5.6046	2108551			5.60452	177367
5.60767	2659041			5.60845	761458			5.6075	2026941			5.60742	174843
5.61058	2610516			5.61137	768609			5.61042	1996970			5.61033	168565
5.6135	2547687			5.61427	749815			5.61333	1958177			5.61325	164716
5.61642	2503479			5.61718	746678			5.61625	1938096			5.61617	159424
5.61932	2437151			5.6201	755613			5.61915	1882548			5.61907	158433
5.62223	2409258			5.62302	760865			5.62207	1862136			5.62198	153757
5.62515	2412137			5.62593	751873			5.62498	1837082			5.6249	145398
5.62807	2368239			5.62883	721042			5.6279	1817663			5.62782	146315
5.63097	2337051			5.63175	735518			5.63082	1763133			5.63072	144096
5.63388	2297258			5.63467	708821			5.63372	1725386			5.63363	139490
5.6368	2250592			5.63758	682499			5.63663	1696180			5.63655	133526
5.63972	2199576			5.6405	662027			5.63955	1658572			5.63947	130529
5.64263	2161509			5.6434	625632			5.64247	1636861			5.64237	119756
5.64553	2118790			5.64632	623349			5.64537	1597015			5.64528	125050
5.64845	2087325			5.64923	624041			5.64828	1580650			5.6482	121573
5.65137	2038416			5.65215	620433			5.6512	1558426			5.65112	110268
5.65428	2027017			5.65507	607631			5.65412	1550662			5.65402	111905
5.65718	2009444			5.65797	617964			5.65702	1522511			5.65693	110082
5.6601	1973597			5.66088	607930			5.65993	1505447			5.65985	108777
5.66302	1962227			5.6638	609725			5.66285	1462962			5.66277	105171
5.66593	1931812			5.66672	627163			5.66577	1413691			5.66568	105533
5.66883	1923432			5.66962	600332			5.66867	1370349			5.66858	105996
5.67175	1906944			5.67253	587805			5.67158	1351984			5.6715	107608
5.67467	1862704			5.67545	560698			5.6745	1350352			5.67442	102675
5.67758	1816609			5.67837	538188			5.67742	1325627			5.67733	101695
5.68048	1806542			5.68128	542484			5.68032	1311573			5.68023	105622
5.6834	1797486			5.68418	525694			5.68323	1279301			5.68315	106163
5.68632	1799926			5.6871	554163			5.68615	1267685			5.68607	108645
5.68923	1746968			5.69002	548720			5.68907	1264001			5.68898	111600
5.69213	1724137			5.69293	558589			5.69197	1245866			5.69188	114078
5.69505	1721751			5.69585	530331			5.69488	1243981			5.6948	110363
5.69797	1726269			5.69875	518453			5.6978	1213951			5.69772	107445
5.70088	1726871			5.70167	513556			5.70072	1207604			5.70063	110696
5.70378	1728090			5.70458	512573			5.70362	1198523			5.70353	110080
5.7067	1683660			5.7075	518903			5.70653	1170484			5.70645	106625
5.70962	1646696			5.71042	515922			5.70945	1135365			5.70937	104977
5.71253	1617921			5.71332	516818			5.71237	1137764			5.71228	105383
5.71543	1630719			5.71623	506320			5.71528	1133565			5.71518	99255.6
5.71835	1620213			5.71915	508843			5.71818	1138129			5.7181	101385
5.72127	1585818			5.72207	498184			5.7211	1111266			5.72102	102379
5.72418	1574562			5.72498	485751			5.72402	1110618			5.72393	100716
5.7271	1564684			5.72788	467011			5.72693	1104128			5.72683	100389
5.73	1557734			5.7308	460643			5.72983	1104100			5.72975	110345
5.73292	1534281			5.73372	477426			5.73275	1085885			5.73267	99621.8
5.73583	1527690			5.73663	482398			5.73567	1073193			5.73558	102628
5.73875	1520265			5.73953	486786			5.73858	1045259			5.7385	101449
5.74165	1510776			5.74245	487446			5.74148	1036236			5.7414	103453
5.74457	1493210			5.74537	500066			5.7444	1010091			5.74432	102913
5.74748	1460415			5.74828	484015			5.74732	1012188			5.74723	106172
5.7504	1454712			5.7512	471322			5.75023	1005216			5.75015	100703
5.7533	1438687			5.7541	483468			5.75313	995561			5.75305	104664
5.75622	1443576			5.75702	432061			5.75605	997938			5.75597	110388
5.75913	1436101			5.75993	424872			5.75897	970911			5.75888	107510
5.76205	1440553			5.76285	465022			5.76188	967461			5.7618	107238
5.76495	1423651			5.76577	452904			5.76478	960930			5.7647	111432
5.76787	1423829			5.76867	469968			5.7677	975196			5.76762	112509
5.77078	1409986			5.77158	459304			5.77062	976123			5.77053	110224
5.7737	1459965			5.7745	445139			5.77353	998350			5.77345	114978
5.7766	1515667			5.77742	439667			5.77643	1038297			5.77635	130020
5.77952	1615258			5.78033	443978			5.77935	1132230			5.77927	147201
5.78243	1782164			5.78323	451807			5.78227	1264751			5.78218	169154
5.78535	2006236			5.78615	438048			5.78518	1461503			5.7851	234724
5.78825	2287274			5.78907	443813			5.7881	1704018			5.788	340270
5.79117	2686326			5.79198	455463			5.791	2014591			5.79092	519158
5.79408	3083011			5.7949	458203			5.79392	2346885			5.79383	774398
5.797	3495706			5.7978	493367			5.79683	2701559			5.79675	1114581
5.79992	3842394			5.80072	564818			5.79975	3042888			5.79965	1554584
5.80282	4164480			5.80363	662426			5.80265	3298634			5.80257	2065927
5.80573	4378737			5.80655	892598			5.80557	3483278			5.80548	2611767
5.80865	4517974			5.80945	1255858			5.80848	3560398			5.8084	3188529
5.81157	4471143			5.81237	1871928			5.8114	3540989			5.81132	3692534
5.81447	4352270			5.81528	2810846			5.8143	3459330			5.81422	4108346
5.81738	4168414			5.8182	4139711			5.81722	3354083			5.81713	4356853
5.8203	4004308			5.82112	5735491			5.82013	3223645			5.82005	4465805
5.82322	3821160			5.82402	7680194			5.82305	3054670			5.82297	4494498
5.82612	3632922			5.82693	9636644			5.82595	2920412			5.82587	4415046
5.82903	3473183			5.82985	11600000			5.82887	2787459			5.82878	4259983
5.83195	3352906			5.83277	13100000			5.83178	2685349			5.8317	4004446
5.83487	3196399			5.83568	14200000			5.8347	2595392			5.83462	3766843
5.83777	3101215			5.83858	14900000			5.8376	2492524			5.83752	3585298
5.84068	3025016			5.8415	15000000			5.84052	2402906			5.84043	3397997
5.8436	2959462			5.84442	14700000			5.84343	2325850			5.84335	3266749
5.84652	2865806			5.84733	13900000			5.84635	2246164			5.84627	3101534
5.84942	2805938			5.85025	13200000			5.84925	2198251			5.84917	2958071
5.85233	2752100			5.85315	12300000			5.85217	2156585			5.85208	2856844
5.85525	2739217			5.85607	11500000			5.85508	2111897			5.855	2734581
5.85817	2698536			5.85898	10700000			5.858	2061086			5.85792	2657175
5.86107	2646765			5.8619	9976762			5.86092	2018765			5.86082	2550081
5.86398	2554836			5.86482	9297647			5.86382	1978365			5.86373	2473815
5.8669	2550804			5.86772	8672709			5.86673	1941231			5.86665	2363311
5.86982	2484238			5.87063	8206606			5.86965	1886949			5.86957	2263536
5.87272	2427014			5.87355	7844590			5.87257	1835342			5.87247	2178902
5.87563	2344776			5.87647	7520481			5.87547	1777994			5.87538	2086782
5.87855	2288093			5.87937	7187379			5.87838	1721195			5.8783	2005425
5.88147	2223392			5.88228	6884533			5.8813	1698656			5.88122	1906640
5.88438	2168001			5.8852	6609972			5.88422	1662003			5.88413	1783421
5.88728	2132995			5.88812	6223224			5.88712	1602769			5.88703	1653411
5.8902	2109075			5.89103	6101023			5.89003	1558735			5.88995	1507903
5.89312	2069924			5.89393	5903910			5.89295	1518361			5.89287	1356732
5.89603	2023927			5.89685	5706067			5.89587	1492362			5.89578	1214976
5.89893	1987619			5.89977	5477659			5.89877	1470319			5.89868	1069834
5.90185	1954751			5.90268	5279468			5.90168	1455925			5.9016	936078
5.90477	1937043			5.9056	5108867			5.9046	1437784			5.90452	813601
5.90768	1854999			5.9085	4939634			5.90752	1388715			5.90743	706778
5.91058	1852972			5.91142	4850104			5.91042	1356927			5.91033	597630
5.9135	1800785			5.91433	4715775			5.91333	1325571			5.91325	530142
5.91642	1765968			5.91725	4628393			5.91625	1282348			5.91617	485154
5.91933	1700119			5.92017	4457324			5.91917	1224295			5.91908	433464
5.92223	1637679			5.92307	4311246			5.92207	1192663			5.92198	403098
5.92515	1586355			5.92598	4117324			5.92498	1150640			5.9249	396860
5.92807	1524592			5.9289	4041630			5.9279	1131328			5.92782	363799
5.93098	1500047			5.93182	3979835			5.93082	1062696			5.93073	343686
5.93388	1460910			5.93473	3983513			5.93372	1021494			5.93363	333446
5.9368	1418404			5.93763	3903526			5.93663	984226			5.93655	321486
5.93972	1380291			5.94055	3756794			5.93955	969881			5.93947	302163
5.94263	1351306			5.94347	3633231			5.94247	944741			5.94238	282650
5.94553	1345427			5.94638	3601709			5.94538	926869			5.94528	275509
5.94845	1323571			5.94928	3485639			5.94828	903003			5.9482	277612
5.95137	1288592			5.9522	3370445			5.9512	886005			5.95112	276538
5.95428	1267665			5.95512	3221956			5.95412	872505			5.95403	262825
5.9572	1250585			5.95803	3206933			5.95703	862689			5.95695	242396
5.9601	1241815			5.96095	3201368			5.95993	844742			5.95985	229365
5.96302	1223131			5.96385	3204192			5.96285	836443			5.96277	227782
5.96593	1200534			5.96677	3140536			5.96577	812858			5.96568	223692
5.96885	1188442			5.96968	3059636			5.96868	817594			5.9686	222141
5.97175	1177806			5.9726	2960084			5.97158	815205			5.9715	209776
5.97467	1196904			5.97552	2885672			5.9745	796221			5.97442	204075
5.97758	1172089			5.97842	2849273			5.97742	791093			5.97733	203425
5.9805	1152712			5.98133	2897304			5.98033	760369			5.98025	204228
5.9834	1151009			5.98425	2887285			5.98323	759892			5.98315	212366
5.98632	1136574			5.98717	2812224			5.98615	753007			5.98607	193359
5.98923	1130799			5.99008	2695981			5.98907	747111			5.98898	198779
5.99215	1101214			5.99298	2692976			5.99198	734515			5.9919	190765
5.99505	1094621			5.9959	2663733			5.99488	725781			5.9948	190242
5.99797	1072184			5.99882	2633674			5.9978	692903			5.99772	188706
6.00088	1076865			6.00173	2563819			6.00072	684730			6.00063	189060
6.0038	1085887			6.00465	2544950			6.00363	695176			6.00355	193029
6.0067	1074175			6.00755	2485760			6.00653	719067			6.00645	191138
6.00962	1058404			6.01047	2440547			6.00945	688242			6.00937	183827
6.01253	1023032			6.01338	2455182			6.01237	674810			6.01228	175523
6.01545	1013655			6.0163	2434456			6.01528	669712			6.0152	173378
6.01835	1008550			6.0192	2487287			6.01818	671899			6.01812	174595
[truncated: 8,578 more rows]

## Sheet: Figure 3
Figure 3A				Figure 3B				Figure 3C					Figure 3D				Figure 3E				Figure 3F				Figure 3G				Figure 3H				Figure 3I				Figure 3J
WT	odr-7	AWC(-)		WT	odr-7	AWC(-)		WT	odr-7	AWC(-)			WT	odr-7	AWC(-)		WT	odr-7	AWC(-)		WT	odr-7	AWC(-)		WT	odr-7	AWC(-)		WT	odr-7	AWC(-)		WT	odr-7	AWC(-)		WT	odr-7	AWC(-)
0.969697	0.903226	-0.12963		0.517241	0.8125	0.265306		0.380952	0.5	-0.69811			0.928571	0.972222	0.3		0.625	0.066667	0.969697		0.449275	0.877193	-0.73333		0.854545	0.917808	0.333333		0.971831	0.9	0.422222		0.714286	0.833333	-0.17647		0.352941	0.443182	0.029851
0.758065	0.6	0.037037		0.794118	0.822222	0.052632		0.684211	0.84466	-0.4			1	0.977778	0.4		0.714286	0.409091	1		0.941176	0.6	0.114754		0.607143	0.966102	0.208333		0.638298	0.509434	-0.3125		-0.33333	0.728814	0.295775		0.435897	0.505376	-0.0625
0.80303	0.48	0.054054		0.647059	0.851852	0.188679		0.619048	0.622642	-0.04167			0.95122	0.976744	-0.25		0.918919	-0.06667	0.909091		0.616667	0.492308	0.408451		0.473684	0.722222	0.558824		0.830986	0.960784	-0.58904		-0.16667	0.186047	-0.15254		-0.1875	0.869565	0.170213
0.972222	0.621622	-0.04348		0.728395	0.984375	0.104167		0.773585	0.925926	0.269231			0.956522	0.928571	-0.12903		0.929825	0.345455	0.829787		0.117647	0.818182	-0.27869		0.927711	1	0.074074		0.925926	1	-0.04		0.491525	0.412698	0.596154		0.179487	0.386364	0.071429
0.816667	0.754386	0.22973		0.596154	0.956522	0.25974		0.709091	0.88	-0.2449			1	0.913043	-0.2549		0.846154	0.471698	0.967742		-0.54167	0.681818	-0.19403		0.647059	0.896104	-0.14894		0.684211	0.746269	0.071429		0.555556	-0.62162	0.45		-0.03846	0.484848	0.184211
0.777778	0.883333	0.376812		0.927273	0.882353	0.28125		0.842105	0.555556	0.209302			0.906977	0.911765	0.178571		0.945205	0.257143	0.898305		0.5	0.878788	0.357143		1	0.518519	0.25		0.938776	0.964912	-0.38		0.5	0.8	0.026316		0.428571	0.434783	0.092308
0.235294	0.916667	-0.09091		0.8	0.896552	0.018018		0.666667	0.8	0.040816			0.839286	0.944444	-0.14706		0.92	0.289474	0.836066		0.794118	0.651163	0.166667		0.8	0.836735	-0.08108		0.969697	0.833333	-0.06944		0.564103	0.294118	0.444444		0.6	0.846154	0.166667
0.901639	0.925926	-0.03636		0.546667	0.869048	0.09901		0.52	0.961538	-0.48276			0.894737	1	-0.09524		0.974684	0.463415	0.966102		0.964912	0.371429	-0.25		0.833333	0.9375	-0.32353		1	0.833333	-0.32203		0.285714	0.705882	0.153846		0.555556	0.409836	0.125
0.791667	1	-0.08571		0.12963	0.721519	0.193878		0.684211	0.571429	-0.07246			0.934426	0.967742	0.122449		0.927273	0.382979	0.941176		1	0.473684	-0.17857		0.914286	0.643836	0.079365		0.807692	0.932203	-0.31884		0.061728	0.339623	-0.06667		0.047619	0.790323	0.384615
0.925926	0.6	-0.23077		0.271186	0.666667	0.232759		0.387097	0.555556	0.36			0.932203	0.983051	0.333333		0.950617	0.55102	0.820513		0.556962	0.578947	0.37931		0.491525	0.703704	0.04918		0.839286	0.811321	-0.21918		0.730769	0.508772	-0.14583		0.37931	0.791667	0.533333
0.958333	0.811321	-0.17778		0.5	0.662651	-0.02198		0.068966	0.575758	0.12			0.957447	1	0.333333		0.869565	0.323944	0.878788		0.828571	0.730769	-0.12162		0.365079	0.78125	0.272727		0.733333	0.65625	-0.17143		0.52	0.087719	0.043478		0.354839	0.582278	0.067416
0.892857	1	0.060976		0.535714	0.678899	0.1		0.269231	0.575	-0.06557			0.97561	0.962963	-0.02128		0.811321	0.62963	0.825		0.694915	0.857143	0.492754		0.728814	0.642857	0.206897		0.904762	0.444444	-0.02128		0.238095	0.428571	-0.28		0.486842	0.466667	0.154639
1	0.953488	0.176471		0.603175	0.56044	0.028037		0.731343	0.142857	0.162162			0.909091	1	-0.05		0.904762	0.61194	0.983333		0.857143	0.710145	0.569231		0.617647	0.802817	-0.68421		0.869565	0.777778	0.140625		0.787234	0.921569	-0.13433		0.285714	0.61039	0.168539
0.854545	0.746032	0		0.451613	0.933333	0.333333		0.215385	0.843137	0.186667			0.956522	0.909091	0.043478		0.962264	0.420561	0.927536		0.870968	0.64	0.434783		0.476923	0.942857	0.182927		0.765625	0.813953	0.065574		0.642857	0.909091	0.297872		0.393443	0.074627	0.047619
0.631579	0.433735	0.023256		0.962963	0.764706	0.22		0.4	0.71134	0.102564			1	0.983871	-0.21818		1	0.285714	0.862745			0.836735	0.071429		0.758621	0.846154	0.071429		0.809524	0.6	0.22449		0.7		-0.30159		0.396825	0.428571	0.011905
0.888889	0.783784	-0.19048		0.787879	1	0.377358		0.672414	0.802469	-0.29167												0.714286			0.544304						-0.10204				0.293103		0.545455	0.56338	0.363636
0.944444	0.309524	-0.26984		0.865169	0.6	0.109756		0.591837	0.784615	0.101124												0.826087									-0.13462				0.125
0.802817	0.788462	0.19697		0.786885	0.442623	0.466667		0.611111	0.777778	0.012821																					0.592593
0.131579	0.829787	0.09375		0.803922	0.525	0.44186		0.685714	0.626667	0.028169																					-0.52
0.676471	0.727273	0.032787		0.942857	0.508772	-0.02128		0.365591	0.8125	0.030769																					-0.31507
0.755102		0.351852		0.977011	0.48			0.692308		-0.1828
								0.698113		0.136364

## Sheet: Figure 3 figure supplements
Figure 3-figure supplement 1A				Figure 3-figure supplement 1B				Figure 3-figure supplement 1C				Figure 3-figure supplement 2B					Figure 3-figure supplement 2C					Figure 3-figure supplement 2D					Figure 3-figure supplement 2E					Figure 3-figure supplement 2F					Figure 3-figure supplement 2G					Figure 3-figure supplement 2H					Figure 3-figure supplement 2I
WT	odr-7	AWC (-)		WT	odr-7	AWC (-)		WT	odr-7	AWC(-)		10-2	10-3	10-4	10-5		1 M	500 mM	100 mM	10 mM		Abs	10-1	10-2	10-3		Abs	10-1	10-2	10-3		Abs	10-1	10-2	10-3		Abs	10-1	10-2	10-3		Abs	10-1	10-2	10-3		Abs	10-1	10-2
0.888889	0.428571	0.438202		0.256098	0.677419	0.142857		0.43662	0.3765	0.152941		0.962264	0.944444	0.417582	0.42029		1	1	0.692308	-0.23377		0.72549	0.128205	0.211538	0.26087		1	0.740741	0.555556	-0.10145		0.625	0.232877	0.4	0.076923		0.333333	0.958333	0.923077	0.230769		-0.19355	0.461538	0.759036	0.462687		-0.57576	-0.4	0.546875
0.772727	0.478261	0.290323		0.162162	0.405405	0.252525		0.319149	0.035714	0.12766		0.903614	1	0.351351	0.130435		1	0.797468	0.685185	-0.16901		0.785714	0.053571	0.222222	0.040816		1	0.642857	0.204819	-0.2381		0.386364	0.211538	0.132075	-0.18033		-0.01538	0.789474	0.90625	0.784615		0.121951	0.508475	0.898734	0.209302		0.068966	-0.77049	-0.82759
0.515152	0.567568	0.475728		0.363636	0.288136	0.218391		0.333333	0.2678	0.37931		0.916667	0.930233	0.385542	0.204082		0.864407	0.8	0.583333	0.45		0.510638	0.297297	0	0.153846		0.967213	0.784615	-0.05882	0.37037		0.710526	0.029412	0.205479	0.129032		-0.52941	0.478261	1	0.52381		-0.20455	0.033333	0.627119	-0.28846		0.180328	-0.22222	0.030303
0.490566	0.4	0.666667		0.472222	0.649485	0.22449		0.59375	0.166667	0.175		0.963636	0.981818	0.34375	0.277778		0.927273	0.672727	0.585714	-0.44		0.75	0.23913	0.081081	0.340909		1	0.957447	-0.19298	0.106383		0.671233	0.305556	-0.08108	0.026316		-0.38983	0.644444	0.96	0.473684		0.309091	0.511111	0.423077	-0.65957		0.5	0.034483	0.131313
0.875	0.586207	0.333333		0.851852	0.47541	0.268293		0.36	0.1234	0.171171		0.983871	0.960784	0.222222	0.26087		0.950617	0.925	0.487805	-0.34211		0.79661	-0.11628	-0.2439	-0.2		1	0.969697	0.083333	-0.06383		0.561404	0.323077	0.190476	-0.08511		-0.43396	0.527778	0.906977	0.645161		0.475	0.4	0.548387	0.666667		-0.07143	-0.68966	-0.16129
0.813333	0.545455	0.793103		0.236364	0.297872	0.036145		0.510204	0.151515	0.36		0.979592	0.955556	0.068182	0.072165		1	0.836066	0.114754	0.466667		0.59375	-0.16667	0.051282	-0.03896		0.473684	0.953488	0.597403	0.40625		0.422222	0.410256	0.092308	0.02		-0.01852	0.473684	0.02439	0.66129		0.569231	0.534884	0.438596	0.520833		-0.04082	0.285714	0.111111
0.639344	0.583333	0.630769		0.452055	0.333333	0.810526		0.44	0.2567	0.301587		0.86	1	0.134328	0.024691		0.962264	0.973333	0.547619	-0.37288		0.674419	0.385965	0.333333	-0.14583		0.932584	0.9125	0.301887	-0.39344		0.569231	0.655738	0.402985	-0.05357		-0.14706	0.5	0.681818	0.355932		-0.21277	0.253968	0.387097	0.159091		0.3125	0.324324	0.225806
0.447368	0.326316	0.708333		0.62069	0.44186	0.1875		0.348837	0.518987	0.3		1	1	0.015385	0.1		1	0.791045	0.2	0.541667		0.666667	0.694444	0.016393	0.482759		0.96875	0.907692	0.771429	0.337838		0.555556	0.264706	-0.45614	-0.23881		-0.31081	0.245614	0.318182	0.080645		-0.55102	-0.52083	0.569231	0.1		-0.2	-0.34286	-0.25
0.513514	0.333333	0.786667		0.58209	0.2	0.625		0.8977	0.191489	0.483871		1	0.952381	0.229508	0.514286		0.977778	0.735294	0.266667	0.102041		0.622642	-0.40351	-0.35714	0.259259		0.946667	0.779221	0.071429	0.054545		0.951613	-0.16279	0.12	0.084746		-0.21429	0.37037	0.290909	0.183333		-0.67347	0.597222	0.911765	0.177778		0.625	0.222222	-0.21053
0.723077	0.72549	0.493976		0.770492	0.5625	0.492063		0.236	0.238095	0.2		1	0.982143	0.071429	-0.05263		0.958333	0.85	0.693548	0.015873		0.666667	0.218182	0.146341	-0.3125		1	0.92	-0.03448	0.641791		0.634146	-0.21667	0.369863	0.283784		-0.16071	0.285714	0.321429	0.510204		-0.47727	0.259259	-0.10417	0.243243		-0.33333	-0.16216	0.325
0.877551	0.297872	0.046875		0.4	0.06383	0.085714		0.736842	0.592593	0.268293		0.972973	0.882353	0.59322	0.153846		0.953846	0.779661		0.54717		-0.28889	0.4	0.674419	-0.65455		1	0.964912	0.62069	0.135593		0.38961	0.21875	0	0.030303		-0.6129	0.973684	0.962264	0.79661		0.377778	0.416667	0.04	0.806452		-0.57143	0.8125	-0.19608
0.666667	0.454545	0.367347		0.5	0.16	0.5		0.605263	0.395349	0.264151		0.961538	1	0.526316	0.369863		1	0.824561		-0.10714		0.361702	0.383333	0.12	-0.63077		1	0.768293	0.076923	-0.58824		0.75	0.349206	0.384615	0.326531		-0.59615	-0.43478	0.173913	0.234043		0.4	0.454545	0.6	-0.03571		0.325	0.74	0.132075
0.826087	0.3125	0.69697		0.833333	0.416667	0.125		0.6	0.463415	0.428571		0.973333	0.921569	0.476923	0.164179		0.957447	1		0.775862		0.333333	0.824561	0.297297	0.4		1	1	0.627907	-0.17391		0.934426	-0.02	0.101266	0.295082		-0.71795	0.886792	0.846154	-0.6		0.507937	0.146341	0.548387	0.222222		0.195652	0.5	-0.05405
0.931818	0.672414	0.603175		0.772727	0.122807	0.117647		0.705882	0.515152	0.541667		0.968254	0.803922	0.435897	0.058824		0.941176			0.25		0.36	0.447368	0.333333	-0.3913		1	0.68254	0.230769	0.288136		0.904762	0.381579	0.474576	-0.15		0.058824	-0.18182	0.52	0.645833		0.023256	-0.07547	0.8	0		0.651163	0.235294	-0.5
0.722222	0.559322	0.405797		0.71831	0.372549	0.021739		0.5876	0.454545	0.365854		0.918367	0.888889	0.418605	-0.02857		0.968254			0.210526		0.8	-0.08	0.444444	-0.07692		1	0.731343	0.111111	0.107692		0.886792	0.472222	0.101695	-0.34146		0.068182	0.716418	-0.26531	0.595238		-0.11765		-0.10638	-0.16216		0.242424	0.304348	0.105263
																																0.395349
																																0.8125
																																0.659574
																																1
																																0.971429
[truncated: 9 more columns]

## Sheet: Figure 4
Figure 4B					Figure 4C					Figure 4D					Figure 4E					Figure 4F					Figure 4G					Figure 4H
Naïve	CEent1	JUb66	BIGb0170		Naïve	CEent1	JUb66	BIGb0170		Naïve	CEent1	JUb66	BIGb0170		Naïve	CEent1	JUb66	BIGb0170		Naïve	CEent1	JUb66	BIGb0170		Naive	CEent1	JUb66	BIGb0170		Naïve	CEent1	JUb66	BIGb0170
0.384615	0.6	0.083333	0.425		1	0.361111	1	0.681818		0.783333	0.075	0.333333	0.674419		0.442623	-0.09302	0.341463	0.777778		0.927273	0.580247	0.461538	0.461538		0.390244	0.076923	0.27027	-0.64103		0.447368	0.722892	0.785714	0.485714
0.416667	0.04	0.5	0.155556		1	0.809524	0.959184	0.6		0.702128	0.368421	-0.23684	0.536585		0.40625	0.027027	-0.01923	0.422222		0.692308	0.6	0.283951	0.283951		0.764706	0.428571	0.230769	0.592593		0.209877	0.288889	0.25641	0.344262
0.333333	-0.125	0.021277	0.485714		1	0.239437	0.811321	0.633333		0.73913	0.083333	0.382979	0.473684		0.580645	0.171429	0.548387	0.559322		0.9	0.555556	0.083333	0.083333		0.027778	0.050847	0.424242	0.704545		0.7	0.566265	0.482143	0.319149
0.5	0.263158	0.220339	0.4		1	0.777778	0.911111	0.770492		0.754386	0.166667	0.289474	0.34375		0.757576	-0.22222	0.358974	0.411765		1	0.695652	0.4375	0.4375		0.232558	0.647059	0.285714	0		0.04878	0.338235	0.347826	0.459459
0.277778	-0.08	0.288889	0.433333		0.229167	0.636364	0.877551	0.6		0.820896	0.243243	0.37037	0.75		0.857143	-0.04167	0.328358	0.368421		0.925926	0.617978	0.35	0.35		0.659091	0.214286	0.333333	0.25		0.151899	0.573529	0.444444	0.21875
0.653333	-0.04545	0.478261	0.333333		0.781818	0.588235	0.769231	0.918367		0.466019	0.683333	0.9	0.377358		0.625	0.285714	0.575758	0.677419		0.685714	0.439024	1	0.92		0.4375	0.5	0.553191	0.409836		0.846154	-0.03448	0.540541	0.52459
0.803922	-0.22388	0.04	0.342466		0.769231	0.873684	0.72973	0.857143		0.639535	0.96875	0.666667	0.635135		0.45098	0.166667	0.32	0.373333		0.846154	0.843137	0.95	0.88		0.423529	0.210526	0.561404	0.474576		0.86	0.583333	0.466667	0.275862
0.540984	-0.08	0.076923	0.347368		0.918919	0.45	0.722222	0.843137		0.590909	0.884615	0.792453	0.179487		0.45	0.020408	0.781818	0.205479		0.975	0.239437	0.836066	0.809524		0.5	0.361702	0.0625	0.482759		0.666667	0.461538	0.65625	0.55102
0.574074	0.119048	0.287356	-0.16		0.972603	0.868421	0.676471	0.882353		0.47541	0.594595	0.559322	0.411765		0.531915	0.127273	0.637681	0.363636		1	0.828571	0.9375	0.925926		0.461538	0.041667	0.47619	0.139535		0.806452	0.372093	0.606061	-0.3125
0.409091	0.013699	0.192308	0.393939		1	0.736264	0.614035	1		0.709677	0.816667	0.302326	0.325581		0.180328	-0.09677	0.761194	0.40625		1	0.529412	0.898305	1		0.519231	0.631579	0.388889	0.09434		0.647059	0.44186	-0.01587	0.677419
0.285714	0.115385	0.218391	0.396825		0.873418	1	1	0.8		0.641791	0.294872	0.716216	0.470588		0.581395	0.129032	0.263158	0.824176		0.723077	-0.08571	0.641026	0.623529		0.358491	0.630769	0.6875	0.736842		0.548387	0.310345	0.615385	0.567568
0.272727	0.118644	0.127273	0.066667		0.792208	0.938462	0.938462	0.641026		0.625	0.354167	0.430769	0.707692		0.698113	-0.08571	0.25641	0.82716		0.52	0.472222	0.333333	0.717949		0.666667	0.019231	0.822222	0.608696		0.659574	0.414634	0.828571	0.538462
0.75	0.151515	0.615385	0.058824		0.879518	0.53125	0.53125	0.931034		0.45283	0.444444	0.627119	0.238095		0.510204	0.222222	0.5625	0.586207		0.740741	0.522388	0.704918	0.613636		0.705882	0.525	0.48	0.225		0.588235	0.52381	0.59322	0.533333
0.189189	0.147059	0.348837	0.030303		0.777778	0.803922	0.803922	0.863014		0.5	0.209302	0.388889	0.866667		0.618182	0.333333	0.413793	0.737705		0.698925	0.454545	0.586207	0.647059		0.766667	0.225	0.266667	0.396825		0.589744	-0.1	0.806452	0.414634
0.636364	0.625	-0.06667	-0.5102		0.781818	0.75	0.75	0.58209		0.621622	0.360465	0.40678	0.648649		0.62069	0.275862	0.384615	0.444444		0.621622	0.388235	0.536232	0.566667		0.913043	0.1	0.444444	0.580645		0.631579	-0.02857	0.575	0.703704
					0.555556															0.5			0.419355
					0.636364																		0.529412
					0.594203																		0.792208
					0.517241																		0.669903
					0.795918

## Sheet: Figure 4 figure supplements
Figure 4-figure supplement 1B				Figure 4-figure supplement 1C				Figure 4-figure supplement 1D				Figure 4-figure supplement 1E
Naïve	Adapted			Naïve	Adapted			Naïve	Adapted			Naïve	Adapted
0.52	0.148936			0.645161	0.70229			0.692308	0.163636			0.141593	-0.405797
0.352941	-0.02222			0.84375	0.441176			0.494845	0.170732			0.2	0.0114943
0.194805	0.214286			0.457627	0.470588			0.481481	0.28125			0.213483	-0.14
0.157895	0.142857			0.670886	0.280488			0.404762	0.135417			0.333333	-0.171053
0.192308	-0.21053			0.824561	0.525641			0.549296	0.108696			0.104651	-0.263158
0.04	0.258427			0.555556	0.545455			0.215686	-0.15152			0.681159	-0.18367
0.1	0.015873			0.586207	0.226667			0.133333	0.081967			0.183673	0.305556
-0.05882	0.205882			0.526316	0.387097			0.607843	0.307692			0.017544	0.272727
0.194805	-0.24324			0.573333	0.642857			0.296703	0.208333			0.366667	0.037037
0.166667	0.035714			0.911765	0.183673			0.538462	0.333333			0.321429	-0.23944
0.42623	-0.01266			0.69697	0.135135			0.473684	0.227273			0.538462	0.111111
0.34375	-0.34211			0.75	0.2			0.419355	0.3			0.73913	0.217391
0.418182	-0.07895			0.666667	0.361702			0.589744	0.333333			0.467742	0.391304
0.323529	0.137931			0.377778	0.339623			0.793103	0.047619			0.555556	0.45614
0.368421	0.035714			0.733333	0.372881			0.395833	0.116279			0.452381	0.12766
				0.465116	0.367647			0.475	0.156863			0.517857	0.133333
				0.396825	0.0714286			0.543478	0.166667			0.529412	0.0625

## Sheet: Figure 5
Figure 5B											Figure 5C											Figure 5D											Figure 5E
WT	JU3226	JU1934	DL226	JU1200	JU1440	JU561	QX1211	JU1711	EG4725		WT	JU3226	JU1934	DL226	JU1200	JU1440	JU561	QX1211	JU1711	EG4725		WT	JU3226	JU1934	DL226	JU1200	JU1440	JU561	QX1211	JU1711	EG4725		WT	JU3226	JU1934	DL226	JU1200	JU1440	JU561	QX1211	JU1711	EG4725
0.928571	0.945946	0.953488	0.862069	1	1	1	0.925926	0.971429	0.820896		0.972973	0.930233	0.948718	0.678571	0.84	0.927273	0.911111	1	0.894737	0.704918		1	0.846154	0.897436	0.899329	0.661017	0.489796	1	0.921569	0.836735	0.921569		0.774194	0.204545	0.6	0.746988	0.464286	0.327586	0.9	0.733333	0.809524	0.306122
1	0.878049	0.948718	0.865385	0.981818	0.8	0.96	0.901639	1	0.793103		0.95	0.897436	0.88	0.612245	0.979592	0.811321	1	0.964912	0.952381	0.454545		0.87234	0.918919	0.875	0.797101	0.555556	0.890625	1	0.8	0.852941	0.788462		0.683333	0.461538	0.837838	0.65625	0.555556	0.567164	1	0.794118	0.803922	0.566667
0.95122	0.940909	0.857143	0.868132	1	0.939394	1	1	0.921569	1		0.95122	0.916667	0.978261	0.766667	0.903226	0.753623	0.963636	1	0.828571	0.802198		0.842105	0.836735	0.867925	0.789916	0.52381	0.623188	1	0.934426	0.222222	0.798319		0.722222	0.416667	0.925926	0.74026	0.597826	0.714286	0.469388	0.769231	0.916667	0.287671
0.956522	0.911111	0.916667	0.862069	0.925926	0.73913	1	1	0.966667	0.855072		0.953488	0.945946	0.882353	0.87156	0.949153	0.94	1	1	0.875	0.714286		0.935484	0.923077	0.945946	0.783333	0.413793	0.78125	0.938776	0.782609	0.491525	0.44		0.661972	0.5	0.842105	0.695313	0.555556	0.395349	0.736842	0.970149	0.980392	0.758621
1	0.95122	0.904762	0.890909	1	0.923077	1	0.945946	0.791667	0.970149		0.95122	0.885714	0.875	0.802469	0.553846	0.862745	0.962963	0.959184	0.58209	0.85		0.886364	0.902439	0.854167	0.88	0.428571	0.8	0.773585	0.442623	0.301205	0.753846		0.6	0.454545	0.926829	0.622222	0.757576	0.176471	0.745455	0.607143	0.939394	0.762712
0.906977	0.909091	0.942857	0.887097	1	1	0.877551	0.880952	0.7	0.928571		1	0.924528	0.952381	0.854369	0.913043	0.859649	0.84127	0.954545	0.581395	0.971014		0.824561	0.916667	0.926829	0.7875	0.935484	0.85	0.824561	0.825243	0.65	0.328125		0.953488	0.813953	0.789474	0.75	0.811321	0.5	0.614035	0.924528	0.814815	0.454545
0.839286	0.930233	1	0.864865	1	0.847826	1	0.890909	0.813953	1		0.954545	0.931034	0.913793	0.792453	0.864407	0.773585	1	0.927273	0.52809	0.911111		0.934783	0.895833	0.754386	0.789474	0.963636	0.843137	0.826087	0.803922	0.020408	0.627119		0.8	0.767442	0.793103	0.666667	1	0.814815	0.666667	0.457627	0.935484	0.471698
0.894737	0.836735	0.948718	0.851485	0.95	0.956522	0.945946	1	0.852632	0.964912		0.906977	0.909091	0.904762	0.89899	0.728814	0.830508	0.932203	0.890909	0.569231	0.968254		0.888889	0.914286	0.807018	0.739837	0.965517	0.923077	0.934426	0.903226	0.692308	0.762712		0.906977	0.794872	0.857143	0.75	0.755102	0.555556	0.422222	0.736842	0.927273	0.783784
0.934426	0.911111	0.888889	0.890909	0.96	0.84507	0.918367	1	0.806452	0.964286		1	0.935484	1	0.87013	0.892857	0.863636	0.75	0.890909	0.723077	0.793103		0.716216	0.961538	0.944444	0.816327	0.833333	0.787234	0.928571	0.742857	0.846154	0.442623		0.906977	0.538462	0.882353	0.768116	0.696203	0.711538	0.921569	0.214286	0.957447	0.559322
0.932203	0.878049	0.820513	0.90099	1	0.911765	1	0.975904	0.885057	0.927273		0.948276	0.890909	0.849057	0.855422	0.877551	0.909091	0.809524	0.789474	0.888889	0.936508		0.916667	0.944444	0.904762	0.780822	0.653333	0.96	0.803279	0.72549	0.7	0.564356		0.64	0.633803	0.822222	0.682171	0.721311	0.492754	0.72	0.921053	0.971831	0.744681
1	0.907692	0.863636	0.872727	1	0.847458	0.023256	0.22449	0.826923	0.826087		1	0.960784	0.961538	0.828571	1	1	0.96	0.906977	0.648148	1		0.882353	0.888889	0.833333	0.865854	0.888889	0.904762	0.805556	0.770492	0.698925	0.733333		0.877551	0.795918	0.653846	0.789474	0.904762	0.88	0.772727	0.413793	0.931818	0.885714
1	0.955224	0.95	0.821429	0.962963	0.862745	1	0.253731	0.925	0.647059		1	0.964286	0.978261	0.832117	0.964912	0.96875	0.894737	0.73913	0.678571	0.921053		0.953488	0.962264	0.74359	0.833333	0.588235	0.673469	0.956522	0.95	0.710843	0.92		0.934426	0.627451	0.644444	0.762712	0.851852	0.767857	0.96	0.882353	0.939394	0.686275
0.959184	0.971831	0.967742	0.840426	1	1	0.722222	0.822222	0.894737	0.906977		0.943396	0.970588	0.962963	0.911111	0.940299	1	1	0.925926	0.765766	0.952941		0.836364	0.820896	0.684211	0.882353	0.791045	0.787879	0.849057	0.555556	0.7	0.936508		0.958333	0.816327	0.75	0.859504	0.836735	0.597015	0.811321	0.451613	0.833333	0.791667
1	0.95	0.804348	0.828125	0.940299	0.944444	0.894737	0.9375	0.794118	0.96875		0.918367	0.960784	0.928571	0.814286	0.971429	0.905405	0.829787	0.869565	0.928571	1		0.952381	0.941176	0.891892	0.790323	0.896552	0.636364	0.909091	0.836066	0.707865	0.958333		0.844444	0.45098	0.882353	0.764706	0.87037	0.73913	0.787234	0.535714	0.977273	0.333333
1	0.928571	0.910448	0.857143	1	0.964912	0.791667	0.833333	0.913043	0.901639		1	0.926829	0.969697	0.856061	0.924731	0.928571		1	0.92	0.971014		0.943396	0.737705	0.694444	0.844156	0.636364	0.836735	0.843137	0.824561	0.659574	0.884615		0.962963	0.377358	0.712121	0.707547	0.869565	0.518987		0.174603	1	0.650794
0.944444											0.984375											0.934426											0.796296
0.983333											0.851852											0.93578											0.96
0.983607											0.878378											0.774648											0.851064
0.956522											0.942529											0.85											0.878049
0.934066											0.96											0.862745											0.916667
0.982143											0.965517											0.689655											0.616667
0.971831											0.957447											0.793651											0.979381
0.947917											0.949495											0.744186											0.834286
1											0.947826											0.867925											0.82243
0.972603											1											0.865979											0.895522
0.971154											0.958333											0.837607											1
0.949367											0.965517											0.777778											0.880597
0.929825											0.959677											0.675											0.938776
0.909091											0.942529											0.910112											0.796875
0.910112											0.979592											0.873418											0.808511
0.979592											0.865385											0.869565											0.788462
1											0.823529											0.755102											0.75
0.982143											0.883333											0.918367											0.73913
1											0.883721											0.909091											0.824561
1											0.839286											0.967742											0.92
0.979592											0.911765											0.470588											0.734694
0.962264											0.882353											0.820896											0.723404
0.96											0.826923											0.431373											0.822222
0.9											0.77193											0.555556											0.6
0.913793											0.920635											0.528571											0.4
0.903846											0.92											0.714286											0.722222
0.956522											0.907407											0.696429											0.76087
0.981818											0.886792											0.533333											0.840909
1											1											0.509091											0.909091
0.95082											0.894737											0.6											0.766667
1											0.953488											0.6											0.940299
0.967213											1											0.866667											0.777778
1											0.92											0.918367											0.357143
0.890909											0.969231											0.882353											0.888889
0.886792											0.931818											0.821429											1
0.916667											0.943662											0.608696											1
0.924528											1											0.727273											0.970149
0.652778											1											0.84127											1
1											0.878049											0.692308											0.324324
1											0.923077											0.380952											0.916667
0.74359											1											0.673913											0.541667
0.72											0.88											0.795918											0.803922
0.886792											0.914286											0.352941											0.92
0.588235																						0.87234											0.829268
																						0.85											0.918367

## Sheet: Figure 6
Figure 6B																	Figure 6F				Figure 6G				Figure 6H
WT	1169	1133	1190	1010	1028	1212	1075	1210	1041	1182	1109	1276	1035	1030	1146		WT	VSL2401	VSL2402		WT	VSL2401	VSL2402		WT	VSL2401	VSL2401; snif-1p::snif-1)	VSL2401; AWCp::snif-1)	VSL2401; AWBp::snif-1)
0.811321	0.487179	0.365854	0.72	0.560976	0.764706	0.535714	0.811321	0.878788	0.764706	0.789474	0.84127	0.653846	0.737705	0.907692	0.862069		0.534247	0.206349	0.454545		0.704918	0.234043	-0.45161		0.661538	0.190476	0.741935	1	0.2
0.78125	0.421053	0.512195	0.781818	0.833333	0.52	0.65625	0.78125	0.829787	0.660377	0.661017	0.340426	0.957447	0.877551	0.781818	0.864407		0.470588	0.392857	0.355932		0.84127	0.52381	-0.53846		0.391304	-0.11321	0.8	0.960784	-0.48
0.849057	0.391304	0.68	0.563636	0.657143	0.818182	0.8	0.849057	0.675676	0.509434	0.789474	0.954545	0.877551	0.914894	0.795918	0.8		0.411765	0.353846	0.150685		0.464286	0.565217	-0.08772		0.875	0.607843	0.52	0.963636	-0.11628
0.791045	0.058824	0.777778	0.666667	0.714286	0.827586	0.722222	0.791045	0.589744	0.962963	0.84127	0.859375	0.688889	0.880597	0.960784	0.968254		0.723077	0.661972	0.642857		0.389831	0.678571	-0.21875		0.95	0.55	0.448276	0.93617	-0.34783
0.346939	0.282051	0.636364	0.48	0.485714	0.365854	0.631579	0.346939	0.773585	0.885714	0.745455	0.955556	0.944444	0.782609	0.864407	0.854545		0.589041	0.433333	0.320755		0.64	0.775	0.510204		0.72093	0.469388	0.8	0.955556	-0.38462
0.372549																	0.9	0.309091	0.275862		1	-0.22034	-0.41176		0.306122	0.02439	0.827586	0.96	-0.44
0.681818																	0.447368	0	0.253333		0.726027	0.058824	-0.37255		0.625	0.206897	0.836066	1	0.014085
0.769231																	0.898305	-0.09091	0.487179		0.037037	0.044444	0.411765		0.755102	-0.05263	0.804878	0.933333	-0.42857
0.75																	0.855072	0.277778	0.277778		0.366667	0.461538	0.130435		0.633333	0.166667	0.833333	1	-0.46032
0.644444																	0.28125	0.34375	0.287671		0.491525	0.463415	0.321429		0.22807	0.153846	0.802469	0.877193	-0.12281
																	0.694444	0.395349	0.121212		0.686275	0.3125	0.148936		0.626667	0.507246	0.489362	1	-0.22388
																	0.75	-0.33333	-0.23333		0.531915	0.105263	0.236364		0.974026	0.244444	0.903226	0.916667	0.058824
																	0.741935	0.396226	-0.19481		0.44	0.344828	0.435897		0.8	0.052632	0.95	0.860465	-0.2
																	0.875	0.230769	-0.24		0.688889	0.642857	0.148936		0.893333	0.061224	0.75	0.952381	-0.2973
																	0.771429	0.035714	0.230769		0.111111	0.674419	0.214286		0.811321	0.323077	0.696203	1	-0.2
																	0.904762	0.028571	0.606557		0.619048	0.631579	0.259259		0.773585	0.101449			-0.05085
																	0.866667	-0.08108	0.551724		0.925926	0.469388	0.368421		0.36	0.670886			-0.14815
																	0.862069	0.366667	0.290323		0.75	0.191489	0.294118		0.555556	0.545455			-0.12727
																	0.888889	-0.18182	0.214286		0.588235	0	0.352941		0.714286	0.375			-0.28
																	0.9375	-0.05085	-0.14706		0.964912		0.352941		0.649123	0.5
																					0.446809		0.741935		0.586957	0.275862
																					0.846154		0.512195		0.694915	0.418182
																									0.630769	0.551724
																									0.666667	0.235294
																									0.428571	0.731343
																									0.5	0.384615
																									0.736842	0.027027
																									0.580645	0.142857
																										0.307692

[truncated: 1 more sheets: Figure 6 figure supplements]
