# Supplementary material for: The olfactory receptor SNIF-1 mediates foraging for leucine-enriched diets in C. elegans
Source: eLife. 2026 Apr 24;13:RP101936. doi: 10.7554/eLife.101936 (PMC13108967; doi:10.7554/eLife.101936)
Supplement: Supplementary file 1. [file elife-101936-supp1.xlsx]

## Sheet: Supplementary file 1
Supplementary file 1: Bacterial strains used in this study
Strain code	Strain name	Family	Phylum	Source
CEent1	Enterobacter hormaechei	Enterobacteriaceae	Pseudomonadota	Dirksen, Philipp et al. 2020
JUb66	Lelliottia amnigena	Enterobacteriaceae	Pseudomonadota	Dirksen, Philipp et al. 2020
MYb10	Acinetobacter guillouiae	Moraxellaceae	Pseudomonadota	Dirksen, Philipp et al. 2020
JUb134	Sphingomonas molluscorum	Sphingomonadaceae	Pseudomonadota	Dirksen, Philipp et al. 2020
JUb19	Stenotrophomonas indicatrix	Xanthomonadaceae	Pseudomonadota	Dirksen, Philipp et al. 2020
MYb11	Pseudomonas lurida	Pseudomonadaceae	Pseudomonadota	Dirksen, Philipp et al. 2020
MSPm1	Pseudomonas berkeleyensis	Pseudomonadaceae	Pseudomonadota	Dirksen, Philipp et al. 2020
BIGb0172	Comamonas piscis	Comamonadaceae	Pseudomonadota	Dirksen, Philipp et al. 2020
BIGb0393	Pantoea nemavictus	Enterobacteriaceae	Pseudomonadota	Dirksen, Philipp et al. 2020
MYb71	Ochrobactrum vermis	Brucellaceae	Proteobacteria	Dirksen, Philipp et al. 2020
BIGb0170	Sphingobacterium multivorum	Sphingobacteriaceae	Bacteroidota	Dirksen, Philipp et al. 2020
JUb44	Chryseobacterium scophthalmum	Weeksellaceae	Bacteroidota	Dirksen, Philipp et al. 2020
OP50	Escherichia coli	Enterobacteriaceae	Pseudomonadota	Dirksen, Philipp et al. 2020
