# Supplementary material for: The olfactory receptor SNIF-1 mediates foraging for leucine-enriched diets in C. elegans
Source: eLife. 2026 Apr 24;13:RP101936. doi: 10.7554/eLife.101936 (PMC13108967; doi:10.7554/eLife.101936)
Supplement: Supplementary file 2. [file elife-101936-supp2.xlsx]

## Sheet: Supplementary file 2
Supplementary file 2: List of volatiles produced by bacteria
Bacteria	Volatiles identified (- LEU)	Volatiles identified (+ LEU)
CEent1	IAA, Acetoin, Isobutanol, Isoamyl acetate, PEA, and 2,3-Butanediol	IAA, Acetoin, Isoamyl acetate, Isovaleraldehyde, and 2-Nonanone
JUb66	IAA, Acetoin, Isobutanol, Isoamyl acetate, PEA, Isovalerate, Isoamyl propionate, 2,3-Butanediol, and 10,13-Octadecadiynoic acid, methyl ester	IAA, Acetoin, Isoamyl acetate, Isovaleraldehyde, and 2-Nonanone
BIGb0170	IAA, Isovalerate, Methyl isovalerate, and Butyl acetate	IAA, Acetoin, Isoamyl acetate, and 2-Nonanone
BIGb0172	1-Tetradecanol, 3-Carene, and Dimethyl, trisulfide	Not detected
BIGb0393	IAA, and PEA	IAA
MYb10	Disulfide, dimethyl, and 2-Heptadecanol, acetate	Not detected
MYb11	1-Undecene, 9,17-Octadecadienal, and Disulfide, dimethyl	1-Undecene, 9,17-Octadecadienal, and Disulfide, dimethyl
MYb71	Disulfide, dimethyl, and 1H-Indene, 1-methylene	1-Undecene
JUb19	Disulfide, dimethyl, Heptadecane, 9-hexyl-, and Dimethyl, trisulfide	IAA
JUb44	IAA	Not detected
JUb134	IAA, and 1-Undecene	Not detected
MSPm1	Disulfide, dimethyl, and Dimethyl, trisulfide	Not detected
E. coli OP50	Indole	Indole
