# Supplementary material for: The olfactory receptor SNIF-1 mediates foraging for leucine-enriched diets in C. elegans
Source: eLife. 2026 Apr 24;13:RP101936. doi: 10.7554/eLife.101936 (PMC13108967; doi:10.7554/eLife.101936)
Supplement: Supplementary file 3. [file elife-101936-supp3.xlsx]

## Sheet: Supplementary file 3
Supplementary file 3: List of C. elegans used in this study
C. elegans strains	Description	Source	Place of isolation
Wild type (WT)	N2 Bristol	CGC
odr-7	CX4 (ky4)	CGC
AWC(-)	PY7502 (oyIs85)	CGC
JU1440	-	Rotting Fruit, Palm	Barcelona, Spain
QX1211	-	Soil under rotting orange	San Francisco, California, USA
JU1171	-	Compost heap	Concepcion, Chile
JU1200	-	Compost heap	Dundaldo, Scotland
JU561	-	Live arthropod, isopod	Sainte-Barbe, France
JU1934	-	Rotting stem, Heracleum sphondylium	Santeuil, France
JU3226	-	Rotting fruit	Wellington, New Zealand
DL226	-	Soil, leaf litter	Oregon, USA
EG4725	-	Rotting fruit, Apple	Amares, Portugal
CHS1010	str-112(yum1145); str-113(yum1146); str-114(yum1147); str-115(yum1148); str-116(yum1149); str-118(yum1150)	Pu et al., 2023b
CHS1028	srj-7(yum1206); srj-8(yum1207); srj-9(yum1208); srj-10(yum1209); srj-11(yum1210) ; srj-13(yum1211); srj-14(yum1212); srj-15(yum1213)	Pu et al., 2023b
CHS1030	str-145(yum1221); str-146(yum1222); str-148(yum1223); str-141(yum1224); str-149(yum1225); str-150(yum1226); str-151(yum1227)	Pu et al., 2023b
CHS1035	str-153(yum1271); str-155(yum1272); str-162(yum1273); str-168(yum1274); str-156(yum1275); str-158(yum1276); str-159(yum1277); str-160(yum1278); str-161(yum1279); str-154(yum1280); str-267(yum1281)	Pu et al., 2023b
CHS1041	frpr-3(yum1321); frpr-4(yum1322); frpr-16(yum1323); frpr-18(yum1324)	Pu et al., 2023b
CHS1075	str-163(yum1473); str-164(yum1474); str-165(yum1475); str-166(yum1476); str-169(yum1477)	Pu et al., 2023b
CHS1109	frpr-1(yum1645); frpr-2(yum1646); frpr-14(yum1647); frpr-17(yum1648)	Pu et al., 2023b
CHS1133	srx-38(yum1772); srx-39(yum1773); srx-41(yum1774); c03g6.21(yum1775); srx-42(yum1776); srx-43(yum1777); fbxa-199(yum1778)	Pu et al., 2023b
CHS1146	srx-48(yum1857); srx-50(yum1858); srx-51(yum1859); srx-54(yum1860); srx-59(yum1862); srx-64(yum1863)	Pu et al., 2023b
CHS1169	srd-10(yum2006); srd-11(yum2007); srd-12(yum2008); srd-13(yum2009); srd-15(yum2010); srd-16(yum2011)	Pu et al., 2023b
CHS1182	str-196(yum2084); str-198(yum2085); str-199(yum2086); str-200(yum2087); str-204(yum2088); str-205(yum2089); str-193(yum2090); str-2(yum2091); str-3(yum2092)	Pu et al., 2023b
CHS1190	srd-1(yum2136); srd-2(yum2137); srd-3(yum2138); srd-4(yum2139); srd-5(yum2140); srd-7(yum2141); srd-8(yum2142); srd-9(yum2143)	Pu et al., 2023b
CHS1210	srsx-1(yum2261); srsx-2(yum2262); srsx-3(yum2263); srsx-5(yum2264); srsx-6(yum2265); srsx-7(yum2266)	Pu et al., 2023b
CHS1212	gnrr-1(yum2273); gnrr-2(yum2274); gnrr-3(yum2275); gnrr-4(yum2276); gnrr-5(yum2277); gnrr-6(yum2278); gnrr-7(yum2279)	Pu et al., 2023b
CHS1276	str-123(yum2774); str-124(yum2775); str-125(yum2776); str-129(yum2777); str-130(yum2778); str-131(yum2779); str-134(yum2780); str-135(yum2781); str-136(yum2782); str-145(yum2783); t06c12.11(yum2784)	Pu et al., 2023b
VSL2401	srd-12 (yum2008) x3	This study
VSL2402	srd-12 (yum2008) x3	This study
VSL2512 (snif-1p::snif-1)	srd-12 (yum2008); vslEx2512 [snif-1p (2Kb)::snif-1::SL2::mCherry::unc-54 3' UTR + unc-122p::GFP]	This study
VSL2404 (AWCp::snif-1)	srd-12 (yum2008); vslEx2404 [odr-1p::snif-1::SL2::mCherry + unc-122p::GFP]	This study
VSL2514 (AWBp::snif-1)	srd-12 (yum2008); vslEx2514 [str-1p::snif-1::SL2::mCherry::unc-54 3' UTR + unc-122p::GFP]	This study
VSL2521	srd-12 (yum2008); vslEx2521 [snif-1p (2Kb)::snif-1:SL2::GFP::unc-54 3' UTR + odr-1p::GPR43::SL2::mCherry + unc-122p::GFP]	This study
