# Supplementary material for: The olfactory receptor SNIF-1 mediates foraging for leucine-enriched diets in C. elegans
Source: eLife. 2026 Apr 24;13:RP101936. doi: 10.7554/eLife.101936 (PMC13108967; doi:10.7554/eLife.101936)
Supplement: Supplementary file 4. [file elife-101936-supp4.xlsx]

## Sheet: Supplementary File 4
Supplementary File 4: Details of primers used in this study.
Gene	Forward Primer	Reverse primer
Cloning
snif-1p for position 1	GGGGACAACTTTGTATAGAAAAGTTGtctagtgtaagagtgaaacttg	GGGGACTGCTTTTTTGTACAAACTTGgactttgatttctgaaaaagaaaa
snif-1 for position 2	GGGGACAAGTTTGTACAAAAAAGCAGGCTATGTTTGATTTTGCTGTTCTCTTCT	GGGGACCACTTTGTACAAGAAAGCTGGGTctcaTTATCCAATAATATGAATAC
Genotyping
VSL2401 and VSL2402	TCAGAAATCAAAGTCATGTTTGATTTTGCTG	CCTGAGACCAGATGAAGGAGATCCATT
qRT-PCR
ilvE	TGTGATCATTGCTGCGTTCC	CCAGCAGTGAGGAGAGGTAG
rpoB	ACCTGACCAAATACACCCGT	GATCTTCCTGAACCACACGC
