# Supplementary material for: The olfactory receptor SNIF-1 mediates foraging for leucine-enriched diets in C. elegans
Source: eLife. 2026 Apr 24;13:RP101936. doi: 10.7554/eLife.101936 (PMC13108967; doi:10.7554/eLife.101936)
Supplement: Supplementary file 5. [file elife-101936-supp5.xlsx]

## Sheet: Supplementary File 5
Supplementary File 5: List of volatiles and their respective solvents used for chemotaxis assay.
Volatiles	Solvent
2,3-Butanediol	Water
Acetoin	Water
Androstenone	Ethanol
Butyl acetate	Water
Butyric acid	Water
Diacetyl	Chloroform
Indole	Chloroform
Isoamyl acetate	Water
Isoamyl alcohol	Ethanol
Isobutanol	Water
Isovalerate	Water
Methyl isovalerate	Water
Phenylethyl alcohol	Water
Propionic acid	Water
